# Supplementary material for: Genetically predicted telomere length and the risk of 11 hematological diseases: a Mendelian randomization study
Source: Aging (Albany NY). 2024 Feb 22;16(5):4270–81. doi: 10.18632/aging.205583 (PMC10968687; doi:10.18632/aging.205583)
Supplement: Supplementary File 1 [file aging-16-205583-s001.xlsx]

## Sheet: Supplementary File 1
Supplementary File 1. Details of the 152 instrumental variables.
SNP	effect_allele.exposure	other_allele.exposure	eaf.exposure	beta.exposure	se.exposure	pval.exposure	samplesize.exposure	R2	F
rs2977608	C	A	0.743949	0.0129483	0.00233716	3e-08	472174	6.5e-05	30.6935
rs66731853	A	G	0.317304	-0.0177791	0.00215421	1.5e-16	472174	0.000144238	68.1148
rs6669563	A	G	0.437768	0.0182358	0.00202476	2.1e-19	472174	0.000171762	81.1149
rs3767952	A	G	0.226709	0.0134472	0.00238826	1.8e-08	472174	6.71e-05	31.7029
rs41269079	A	T	0.188991	0.0153617	0.0025499	1.7e-09	472174	7.69e-05	36.2936
rs139795227	C	A	0.014021	0.0599379	0.00873247	6.7e-12	472174	9.98e-05	47.1115
rs145114957	G	C	0.042648	0.0272605	0.00498872	4.6e-08	472174	6.32e-05	29.8598
rs4498805	T	G	0.546632	0.0150601	0.00200376	5.7e-14	472174	0.000119622	56.4888
rs11584821	T	C	0.176208	-0.0306517	0.00263623	3e-31	472174	0.000286231	135.189
rs11579626	C	A	0.084882	0.0265113	0.00357752	1.3e-13	472174	0.000116291	54.9156
rs6587577	G	A	0.826346	-0.0182148	0.0026359	4.8e-12	472174	0.000101122	47.7517
rs6659669	T	C	0.605095	-0.0117091	0.00205167	1.1e-08	472174	6.9e-05	32.5709
rs932002	T	C	0.150843	-0.0402052	0.00279667	7.3e-47	472174	0.000437512	206.671
rs2555104	C	A	0.434255	-0.0139717	0.00203498	6.6e-12	472174	9.98e-05	47.1386
rs56178008	A	T	0.437497	0.0143739	0.00201464	9.7e-13	472174	0.000107797	50.9041
rs6751209	C	T	0.204231	-0.0140465	0.00248465	1.6e-08	472174	6.77e-05	31.9598
rs188918174	T	C	0.036106	0.0403062	0.00543604	1.2e-13	472174	0.00011642	54.9764
rs202034370	T	TA	0.97541	0.102784	0.00650108	2.6e-56	472174	0.000529113	249.964
rs376641875	C	CATAA	0.928873	-0.0265863	0.00422973	3.3e-10	472174	8.37e-05	39.5083
rs77732866	A	G	0.137597	0.0177942	0.00290595	9.2e-10	472174	7.94e-05	37.4955
rs17803849	T	C	0.405161	0.0273203	0.00203482	4.2e-41	472174	0.000381638	180.267
rs869785	C	T	0.672471	-0.0147303	0.00212801	4.4e-12	472174	0.000101468	47.9153
rs2230590	C	T	0.510897	-0.0158022	0.00200806	3.6e-15	472174	0.000131136	61.927
rs78491606	C	A	0.018433	-0.0756311	0.00741168	1.9e-24	472174	0.00022048	104.128
rs13062095	C	T	0.327843	0.0138552	0.00214113	9.7e-11	472174	8.87e-05	41.8733
rs6776756	A	G	0.597562	-0.0174439	0.00203747	1.1e-17	472174	0.000155216	73.2998
rs11426156	T	TA	0.399525	-0.0115882	0.0020709	2.2e-08	472174	6.63e-05	31.3121
rs9878436	T	C	0.434393	-0.0143407	0.00201819	1.2e-12	472174	0.000106922	50.4911
rs201009932	T	TA	0.991068	0.0769296	0.0116209	3.6e-11	472174	9.28e-05	43.8234
rs10936598	C	A	0.32379	-0.0656433	0.00214663	1e-200	472174	0.00197654	935.114
rs76094497	A	G	0.051569	0.0278689	0.00461731	1.6e-09	472174	7.71e-05	36.43
rs112394943	C	T	0.162741	-0.0198961	0.00281641	1.6e-12	472174	0.000105681	49.9048
rs2282764	G	A	0.142384	-0.0224234	0.00289392	9.3e-15	472174	0.000127137	60.0383
rs871134	T	C	0.569032	-0.0182986	0.0020263	1.7e-19	472174	0.000172684	81.5505
rs10805346	C	T	0.439339	0.0117072	0.00202147	7e-09	472174	7.1e-05	33.5405
rs4695407	G	A	0.507843	0.0141511	0.00199925	1.5e-12	472174	0.000106096	50.1008
rs35500378	CACTT	C	0.610542	0.014467	0.00205607	2e-12	472174	0.000104842	49.5085
rs6536702	A	G	0.774647	0.0534148	0.00238875	9.4e-111	472174	0.00105784	500.011
rs11746381	C	T	0.0568	0.0329955	0.00431036	1.9e-14	472174	0.000124087	58.5977
rs11745132	T	G	0.00789	0.0709046	0.0119367	2.8e-09	472174	7.47e-05	35.284
rs7726159	A	C	0.327295	0.0707719	0.0021282	1e-200	472174	0.00233657	1105.85
rs61748181	T	C	0.028928	-0.059181	0.00595394	2.8e-23	472174	0.000209201	98.7993
rs6881568	A	C	0.36258	0.0169256	0.00207735	3.7e-16	472174	0.000140574	66.3845
rs141214782	TTATC	T	0.101206	-0.0246687	0.00335723	2e-13	472174	0.000114335	53.9919
rs55747751	A	G	0.077375	-0.0211612	0.00375164	1.7e-08	472174	6.74e-05	31.8153
rs185174247	A	G	0.05609	0.0372806	0.00435145	1.1e-17	472174	0.000155428	73.4
rs80324517	A	G	0.048259	0.0396515	0.00466286	1.8e-17	472174	0.000153125	72.3124
rs142730696	TTTTTC	T	0.864083	0.0216931	0.00301569	6.3e-13	472174	0.000109577	51.745
rs7772289	T	G	0.503081	0.017549	0.00200003	1.7e-18	472174	0.000163027	76.9892
rs201558190	C	T	0.363271	-0.0181748	0.00217477	6.4e-17	472174	0.000147893	69.8411
rs2763979	T	C	0.359721	-0.0277713	0.00208092	1.3e-40	472174	0.000377065	178.107
rs9398196	G	A	0.52005	-0.0143586	0.00201175	9.5e-13	472174	0.000107877	50.9418
rs61405042	T	C	0.029288	-0.0501874	0.00602955	8.5e-17	472174	0.000146708	69.2816
rs13230646	C	T	0.248945	-0.0173277	0.00232377	8.9e-14	472174	0.000117745	55.6024
rs11769630	A	T	0.072227	-0.0256807	0.00389475	4.3e-11	472174	9.21e-05	43.4763
rs2538745	C	T	0.602841	-0.012942	0.002056	3.1e-10	472174	8.39e-05	39.6237
rs2056726	A	G	0.214376	-0.0228078	0.00243638	7.9e-21	472174	0.000185564	87.6345
rs7790856	T	C	0.289139	-0.0437199	0.00220526	1.8e-87	472174	0.000831716	393.04
rs117630647	A	G	0.021346	0.059565	0.00720413	1.4e-16	472174	0.000144762	68.3624
rs4731541	G	C	0.624901	-0.0206119	0.00205962	1.4e-23	472174	0.000212064	100.152
rs117407747	T	C	0.027571	0.0450533	0.00611706	1.8e-13	472174	0.000114872	54.2458
rs1985369	G	A	0.868178	-0.0311893	0.00300952	3.6e-25	472174	0.000227413	107.403
rs2306646	C	G	0.559475	-0.0209417	0.00201898	3.3e-25	472174	0.000227803	107.587
rs762679	A	T	0.856501	0.0310104	0.00285024	1.4e-27	472174	0.000250635	118.372
rs11991877	A	T	0.889309	-0.030138	0.00318686	3.2e-21	472174	0.000189373	89.4337
rs10112752	A	G	0.430369	-0.0287522	0.00202518	9.5e-46	472174	0.000426705	201.564
rs1023767	A	G	0.237595	-0.0183732	0.00234772	5e-15	472174	0.000129694	61.2456
rs34896435	G	C	0.469158	0.0154567	0.00206109	6.4e-14	472174	0.000119093	56.239
rs11557154	T	C	0.13003	-0.0343719	0.00298538	1.1e-30	472174	0.000280662	132.558
rs4743037	T	C	0.230874	0.0147971	0.00238094	5.1e-10	472174	8.18e-05	38.6238
rs10905255	T	G	0.57919	-0.0182493	0.00203099	2.6e-19	472174	0.000170962	80.7374
rs7099229	A	G	0.273301	-0.0153288	0.00224403	8.4e-12	472174	9.88e-05	46.6613
rs12412214	A	G	0.279765	-0.0245174	0.00222685	3.4e-28	472174	0.000256657	121.217
rs117034449	A	G	0.023304	0.0374377	0.00667898	2.1e-08	472174	6.65e-05	31.4193
rs6584579	G	A	0.398876	0.0114923	0.00204674	2e-08	472174	6.68e-05	31.5273
rs9419958	C	T	0.86139	-0.0810098	0.00293847	2.6e-167	472174	0.00160706	760.03
rs77231040	C	G	0.005742	0.0989303	0.0134649	2e-13	472174	0.000114314	53.9822
rs939916	A	G	0.669967	0.0241795	0.00216724	6.6e-29	472174	0.000263551	124.474
rs10768683	G	C	0.841033	0.0469922	0.00277015	1.5e-64	472174	0.000609086	287.768
rs10840270	G	C	0.655684	0.014383	0.00212494	1.3e-11	472174	9.7e-05	45.8146
rs2293579	A	G	0.386274	-0.012915	0.00205481	3.3e-10	472174	8.37e-05	39.5042
rs611646	A	T	0.408685	-0.0368309	0.00203547	3.5e-73	472174	0.000692934	327.411
rs11212631	C	T	0.199229	-0.0193458	0.00256554	4.7e-14	472174	0.00012041	56.8609
rs6590343	G	A	0.516385	0.0121739	0.00201444	1.5e-09	472174	7.73e-05	36.5215
rs10845387	A	G	0.352666	-0.0141214	0.00209396	1.5e-11	472174	9.63e-05	45.4796
rs12369950	C	T	0.140675	-0.0178308	0.00290205	8e-10	472174	7.99e-05	37.7511
rs79977579	A	C	0.09555	0.0281517	0.00343182	2.3e-16	472174	0.000142494	67.2912
rs17445108	A	G	0.12695	-0.0168922	0.00300983	2e-08	472174	6.67e-05	31.4983
rs1907702	A	G	0.766771	0.0150247	0.00242651	5.9e-10	472174	8.12e-05	38.3394
rs10774624	A	G	0.53276	0.0149944	0.00205494	2.9e-13	472174	0.000112748	53.2425
rs76666449	C	T	0.100625	0.0295125	0.00333186	8.2e-19	472174	0.000166136	78.4579
rs10773176	G	A	0.741214	-0.0172009	0.00228534	5.2e-14	472174	0.000119963	56.6499
rs28577594	C	G	0.709829	0.0187657	0.00224024	5.4e-17	472174	0.000148585	70.1679
rs1332941	G	A	0.820466	0.0256552	0.00273159	5.9e-21	472174	0.000186783	88.21
rs670180	A	T	0.569104	-0.0115801	0.00203062	1.2e-08	472174	6.89e-05	32.5211
rs9600019	T	C	0.335579	0.0127134	0.00213096	2.4e-09	472174	7.54e-05	35.5935
rs3093888	A	G	0.05131	-0.028973	0.00452459	1.5e-10	472174	8.68e-05	41.004
rs73581419	T	C	0.106605	0.0229838	0.00324156	1.3e-12	472174	0.00010646	50.2729
rs113525195	A	C	0.290254	-0.0124075	0.00224132	3.1e-08	472174	6.49e-05	30.645
rs45604339	T	C	0.34242	-0.020433	0.00211433	4.3e-22	472174	0.000197756	93.3936
rs137901416	A	G	0.100311	0.04572	0.00332355	4.7e-43	472174	0.000400619	189.237
rs34550383	C	CT	0.5474	-0.0192236	0.00200412	8.6e-22	472174	0.000194821	92.0068
rs1957937	T	A	0.16018	0.0209365	0.00273361	1.9e-14	472174	0.000124216	58.6588
rs17677991	G	C	0.342123	0.0222664	0.00210806	4.4e-26	472174	0.000236227	111.566
rs11412296	T	TA	0.759384	0.0332259	0.00234478	1.4e-45	472174	0.000425072	200.792
rs7164950	G	A	0.405979	0.0129362	0.00204001	2.3e-10	472174	8.52e-05	40.2112
rs5742915	C	T	0.445829	0.0193377	0.00202886	1.6e-21	472174	0.000192362	90.8455
rs80116508	A	G	0.062356	-0.0352672	0.00415151	2e-17	472174	0.000152813	72.1652
rs12932179	G	A	0.561399	-0.0136257	0.0020276	1.8e-11	472174	9.56e-05	45.1597
rs182059586	C	T	0.02511	-0.0571159	0.00680853	4.9e-17	472174	0.000149019	70.3729
rs450962	G	A	0.283779	0.0142833	0.00245428	5.9e-09	472174	7.17e-05	33.8694
rs111950327	C	G	0.063628	0.0238271	0.00409406	5.9e-09	472174	7.17e-05	33.8713
rs76219171	A	G	0.058433	0.0359839	0.00431741	7.8e-17	472174	0.000147097	69.4653
rs3785074	G	A	0.289672	0.023863	0.00220455	2.6e-27	472174	0.000248085	117.168
rs56061761	A	G	0.332642	-0.0203556	0.0022296	6.9e-20	472174	0.000176496	83.3512
rs76065543	T	C	0.137527	0.0342843	0.00290708	4.2e-32	472174	0.000294474	139.083
rs2967355	C	A	0.774276	-0.0461595	0.00238972	4e-83	472174	0.000789556	373.101
rs11117354	C	T	0.696513	0.0232506	0.00219601	3.4e-26	472174	0.000237353	112.098
rs12925933	C	A	0.66221	-0.0146622	0.00213796	7e-12	472174	9.96e-05	47.0324
rs59409453	G	A	0.730602	0.0202133	0.00230175	1.6e-18	472174	0.0001633	77.1181
rs12451892	C	T	0.380511	-0.0116145	0.00207578	2.2e-08	472174	6.63e-05	31.3066
rs4724	A	G	0.116598	-0.0547446	0.00312441	9.8e-69	472174	0.000649774	307.004
rs75664430	G	C	0.248028	-0.0235179	0.0023186	3.6e-24	472174	0.000217846	102.883
rs111527438	C	T	0.351251	0.0125	0.00211016	3.1e-09	472174	7.43e-05	35.0903
rs56799554	G	A	0.170183	-0.0259793	0.00267858	3e-22	472174	0.000199185	94.0684
rs7209057	A	G	0.561044	0.011819	0.00202865	5.7e-09	472174	7.19e-05	33.9426
rs144204502	T	C	0.012562	-0.100574	0.00913369	3.4e-28	472174	0.000256723	121.249
rs7221585	T	C	0.22401	0.0143271	0.00247042	6.7e-09	472174	7.12e-05	33.6336
rs3891167	G	A	0.253435	-0.0425685	0.00239551	1.2e-70	472174	0.000668326	315.776
rs150150565	T	C	0.021455	0.063762	0.00739877	6.8e-18	472174	0.000157266	74.2682
rs116863223	A	G	0.011763	-0.0817874	0.00937157	2.6e-18	472174	0.000161278	76.1634
rs139669835	T	C	0.009365	-0.0612563	0.0105346	6.1e-09	472174	7.16e-05	33.8114
rs16978028	T	A	0.143727	-0.029945	0.00285068	8.2e-26	472174	0.000233641	110.344
rs2276182	G	C	0.403227	0.0233529	0.00204247	2.8e-30	472174	0.000276788	130.728
rs9955360	A	C	0.869288	-0.0190311	0.00299791	2.2e-10	472174	8.53e-05	40.2985
rs11085072	T	C	0.236909	-0.0131806	0.00236713	2.6e-08	472174	6.57e-05	31.0045
rs8105767	G	A	0.29467	0.0328384	0.00220117	2.5e-50	472174	0.00047114	222.564
rs4530278	T	G	0.59815	0.0138793	0.0020567	1.5e-11	472174	9.64e-05	45.5398
rs429358	C	T	0.153969	0.0173498	0.00277091	3.8e-10	472174	8.3e-05	39.2051
rs8102497	A	G	0.431828	-0.0149654	0.0020233	1.4e-13	472174	0.000115852	54.7084
rs6054257	A	G	0.793522	-0.0141684	0.00247729	1.1e-08	472174	6.93e-05	32.7104
rs1291143	C	A	0.849026	0.0493145	0.0027991	1.8e-69	472174	0.000656939	310.392
rs11699829	A	G	0.034146	0.0641957	0.00602028	1.5e-26	472174	0.000240753	113.704
rs143190905	T	G	0.080404	-0.0723995	0.00369421	1.6e-85	472174	0.00081278	384.084
rs35640778	A	G	0.020757	-0.209011	0.00702087	9.59e-195	472174	0.00187344	886.247
rs41304832	A	G	0.012378	0.0611702	0.0093095	5e-11	472174	9.14e-05	43.1743
rs142426306	T	C	0.039544	-0.0504903	0.00539933	8.7e-21	472174	0.000185163	87.4449
rs117512405	A	G	0.017043	-0.0790134	0.00824611	9.5e-22	472174	0.000194409	91.8124
rs28502153	A	C	0.377958	-0.0215916	0.00206208	1.2e-25	472174	0.000232143	109.637
rs6007020	C	T	0.367823	0.0144904	0.00209637	4.8e-12	472174	0.000101176	47.7775
rs131797	T	TAAAAA	0.235625	0.0243752	0.00236561	6.8e-25	472174	0.000224807	106.172
rs1003322	A	C	0.213742	0.0141734	0.00247546	1e-08	472174	6.94e-05	32.7819
