# Supplementary material for: Genetically predicted telomere length and the risk of 11 hematological diseases: a Mendelian randomization study
Source: Aging (Albany NY). 2024 Feb 22;16(5):4270–81. doi: 10.18632/aging.205583 (PMC10968687; doi:10.18632/aging.205583)
Supplement: Supplementary File 4 [file aging-16-205583-s004.xlsx]

## Sheet: acute lymphocytic leukemia
Supplementary File 4. Details of all the MR analysis results.
SNP	effect_allele.exposure	other_allele.exposure	effect_allele.outcome	other_allele.outcome	beta.exposure	beta.outcome	eaf.exposure	eaf.outcome	remove	palindromic	ambiguous	se.outcome	pval.outcome	samplesize.outcome	outcome	mr_keep.outcome	pval_origin.outcome	se.exposure	pval.exposure	samplesize.exposure	exposure	mr_keep.exposure	pval_origin.exposure	data_source.exposure	action	mr_keep	R2	F
rs1003322	A	C	A	C	0.0141734	0.274615	0.213742	0.177735	FALSE	FALSE	FALSE	0.143893	0.05633	314389	ALL	TRUE	reported	0.00247546	1e-08	472174	TL	TRUE	reported	textfile	2	TRUE	6.94231e-05	32.7819
rs10112752	A	G	A	G	-0.0287522	-0.0423242	0.430369	0.438738	FALSE	FALSE	FALSE	0.10204	0.678305	314389	ALL	TRUE	reported	0.00202518	9.5e-46	472174	TL	TRUE	reported	textfile	2	TRUE	0.000426705	201.564
rs1023767	A	G	A	G	-0.0183732	-0.0163416	0.237595	0.371514	FALSE	FALSE	FALSE	0.104458	0.875685	314389	ALL	TRUE	reported	0.00234772	5e-15	472174	TL	TRUE	reported	textfile	2	TRUE	0.000129694	61.2456
rs10768683	G	C	G	C	0.0469922	-0.0200778	0.841033	0.789131	FALSE	TRUE	FALSE	0.12579	0.873185	314389	ALL	TRUE	reported	0.00277015	1.5e-64	472174	TL	TRUE	reported	textfile	2	TRUE	0.000609086	287.768
rs10773176	G	A	G	A	-0.0172009	0.0983685	0.741214	0.826515	FALSE	FALSE	FALSE	0.129739	0.448328	314389	ALL	TRUE	reported	0.00228534	5.2e-14	472174	TL	TRUE	reported	textfile	2	TRUE	0.000119963	56.6499
rs10774624	A	G	A	G	0.0149944	-0.0886785	0.53276	0.575764	FALSE	FALSE	FALSE	0.103889	0.393334	314389	ALL	TRUE	reported	0.00205494	2.9e-13	472174	TL	TRUE	reported	textfile	2	TRUE	0.000112748	53.2425
rs10805346	C	T	C	T	0.0117072	-0.0138007	0.439339	0.445735	FALSE	FALSE	FALSE	0.102855	0.893263	314389	ALL	TRUE	reported	0.00202147	7e-09	472174	TL	TRUE	reported	textfile	2	TRUE	7.10295e-05	33.5405
rs10840270	G	C	G	C	0.014383	-0.181	0.655684	0.623928	FALSE	TRUE	FALSE	0.107762	0.0930294	314389	ALL	TRUE	reported	0.00212494	1.3e-11	472174	TL	TRUE	reported	textfile	2	TRUE	9.702e-05	45.8146
rs10845387	A	G	A	G	-0.0141214	0.127602	0.352666	0.369762	FALSE	FALSE	FALSE	0.109287	0.242971	314389	ALL	TRUE	reported	0.00209396	1.5e-11	472174	TL	TRUE	reported	textfile	2	TRUE	9.63108e-05	45.4796
rs10905255	T	G	T	G	-0.0182493	0.102078	0.57919	0.583289	FALSE	FALSE	FALSE	0.102549	0.31954	314389	ALL	TRUE	reported	0.00203099	2.6e-19	472174	TL	TRUE	reported	textfile	2	TRUE	0.000170962	80.7374
rs10936598	C	A	C	A	-0.0656433	-0.0750918	0.32379	0.336668	FALSE	FALSE	FALSE	0.106221	0.479604	314389	ALL	TRUE	reported	0.00214663	1e-200	472174	TL	TRUE	reported	textfile	2	TRUE	0.00197654	935.114
rs11085072	T	C	T	C	-0.0131806	-0.127964	0.236909	0.146989	FALSE	FALSE	FALSE	0.137569	0.352278	314389	ALL	TRUE	reported	0.00236713	2.6e-08	472174	TL	TRUE	reported	textfile	2	TRUE	6.56592e-05	31.0045
rs11117354	C	T	C	T	0.0232506	-0.0788024	0.696513	0.560436	FALSE	FALSE	FALSE	0.103045	0.444427	314389	ALL	TRUE	reported	0.00219601	3.4e-26	472174	TL	TRUE	reported	textfile	2	TRUE	0.000237353	112.098
rs111527438	C	T	C	T	0.0125	0.0418437	0.351251	0.329412	FALSE	FALSE	FALSE	0.10825	0.69909	314389	ALL	TRUE	reported	0.00211016	3.1e-09	472174	TL	TRUE	reported	textfile	2	TRUE	7.43113e-05	35.0903
rs111950327	C	G	C	G	0.0238271	-0.0601904	0.063628	0.0507614	FALSE	TRUE	FALSE	0.226161	0.790133	314389	ALL	TRUE	reported	0.00409406	5.9e-09	472174	TL	TRUE	reported	textfile	2	TRUE	7.173e-05	33.8713
rs112394943	C	T	C	T	-0.0198961	-0.0530847	0.162741	0.230148	FALSE	FALSE	FALSE	0.120924	0.660668	314389	ALL	TRUE	reported	0.00281641	1.6e-12	472174	TL	TRUE	reported	textfile	2	TRUE	0.000105681	49.9048
rs113525195	A	C	A	C	-0.0124075	-0.119326	0.290254	0.279188	FALSE	FALSE	FALSE	0.110096	0.278436	314389	ALL	TRUE	reported	0.00224132	3.1e-08	472174	TL	TRUE	reported	textfile	2	TRUE	6.48979e-05	30.645
rs11557154	T	C	T	C	-0.0343719	0.169985	0.13003	0.150154	FALSE	FALSE	FALSE	0.14964	0.255973	314389	ALL	TRUE	reported	0.00298538	1.1e-30	472174	TL	TRUE	reported	textfile	2	TRUE	0.000280662	132.558
rs11579626	C	A	C	A	0.0265113	0.0889029	0.084882	0.130069	FALSE	FALSE	FALSE	0.155603	0.567767	314389	ALL	TRUE	reported	0.00357752	1.3e-13	472174	TL	TRUE	reported	textfile	2	TRUE	0.000116291	54.9156
rs11584821	T	C	T	C	-0.0306517	0.0100092	0.176208	0.179944	FALSE	FALSE	FALSE	0.132252	0.939672	314389	ALL	TRUE	reported	0.00263623	3e-31	472174	TL	TRUE	reported	textfile	2	TRUE	0.000286231	135.189
rs116863223	A	G	A	G	-0.0817874	-0.24499	0.011763	0.0126904	FALSE	FALSE	FALSE	0.39674	0.536901	314389	ALL	TRUE	reported	0.00937157	2.6e-18	472174	TL	TRUE	reported	textfile	2	TRUE	0.000161278	76.1634
rs11699829	A	G	A	G	0.0641957	0.383792	0.034146	0.0200557	FALSE	FALSE	FALSE	0.428835	0.370806	314389	ALL	TRUE	reported	0.00602028	1.5e-26	472174	TL	TRUE	reported	textfile	2	TRUE	0.000240753	113.704
rs117034449	A	G	A	G	0.0374377	-0.232887	0.023304	0.0126904	FALSE	FALSE	FALSE	0.402203	0.562571	314389	ALL	TRUE	reported	0.00667898	2.1e-08	472174	TL	TRUE	reported	textfile	2	TRUE	6.65376e-05	31.4193
rs117407747	T	C	T	C	0.0450533	0.848635	0.027571	0.0255101	FALSE	FALSE	FALSE	0.354516	0.0166755	314389	ALL	TRUE	reported	0.00611706	1.8e-13	472174	TL	TRUE	reported	textfile	2	TRUE	0.000114872	54.2458
rs11746381	C	T	C	T	0.0329955	-0.134561	0.0568	0.0616204	FALSE	FALSE	FALSE	0.198372	0.497565	314389	ALL	TRUE	reported	0.00431036	1.9e-14	472174	TL	TRUE	reported	textfile	2	TRUE	0.000124087	58.5977
rs117512405	A	G	A	G	-0.0790134	0.0442428	0.017043	0.0573007	FALSE	FALSE	FALSE	0.225409	0.844392	314389	ALL	TRUE	reported	0.00824611	9.5e-22	472174	TL	TRUE	reported	textfile	2	TRUE	0.000194409	91.8124
rs117630647	A	G	A	G	0.059565	0.209973	0.021346	0.0203046	FALSE	FALSE	FALSE	0.396096	0.596038	314389	ALL	TRUE	reported	0.00720413	1.4e-16	472174	TL	TRUE	reported	textfile	2	TRUE	0.000144762	68.3624
rs11769630	A	T	A	T	-0.0256807	-0.0584977	0.072227	0.0974321	FALSE	TRUE	FALSE	0.1684	0.728311	314389	ALL	TRUE	reported	0.00389475	4.3e-11	472174	TL	TRUE	reported	textfile	2	TRUE	9.20688e-05	43.4763
rs11991877	A	T	A	T	-0.030138	0.0878322	0.889309	0.86802	FALSE	TRUE	FALSE	0.145486	0.546034	314389	ALL	TRUE	reported	0.00318686	3.2e-21	472174	TL	TRUE	reported	textfile	2	TRUE	0.000189373	89.4337
rs12369950	C	T	C	T	-0.0178308	0.0362846	0.140675	0.154792	FALSE	FALSE	FALSE	0.142413	0.79889	314389	ALL	TRUE	reported	0.00290205	8e-10	472174	TL	TRUE	reported	textfile	2	TRUE	7.99457e-05	37.7511
rs12412214	A	G	A	G	-0.0245174	0.00227357	0.279765	0.391241	FALSE	FALSE	FALSE	0.104396	0.982625	314389	ALL	TRUE	reported	0.00222685	3.4e-28	472174	TL	TRUE	reported	textfile	2	TRUE	0.000256657	121.217
rs12451892	C	T	C	T	-0.0116145	0.00503965	0.380511	0.426237	FALSE	FALSE	FALSE	0.103364	0.961114	314389	ALL	TRUE	reported	0.00207578	2.2e-08	472174	TL	TRUE	reported	textfile	2	TRUE	6.62991e-05	31.3066
rs1291143	C	A	C	A	0.0493145	0.103102	0.849026	0.795173	FALSE	FALSE	FALSE	0.122808	0.401169	314389	ALL	TRUE	reported	0.0027991	1.8e-69	472174	TL	TRUE	reported	textfile	2	TRUE	0.000656939	310.392
rs12925933	C	A	C	A	-0.0146622	-0.170004	0.66221	0.499881	FALSE	FALSE	FALSE	0.102721	0.0979242	314389	ALL	TRUE	reported	0.00213796	7e-12	472174	TL	TRUE	reported	textfile	2	TRUE	9.95987e-05	47.0324
rs12932179	G	A	G	A	-0.0136257	0.0539039	0.561399	0.628765	FALSE	FALSE	FALSE	0.104268	0.605176	314389	ALL	TRUE	reported	0.0020276	1.8e-11	472174	TL	TRUE	reported	textfile	2	TRUE	9.56334e-05	45.1597
rs131797	T	TAAAAA	T	TAAAAA	0.0243752	0.269461	0.235625	0.224883	FALSE	FALSE	FALSE	0.130123	0.0383751	314389	ALL	TRUE	reported	0.00236561	6.8e-25	472174	TL	TRUE	reported	textfile	2	TRUE	0.000224807	106.172
rs13230646	C	T	C	T	-0.0173277	0.0395579	0.248945	0.184383	FALSE	FALSE	FALSE	0.133403	0.766826	314389	ALL	TRUE	reported	0.00232377	8.9e-14	472174	TL	TRUE	reported	textfile	2	TRUE	0.000117745	55.6024
rs1332941	G	A	G	A	0.0256552	-0.160297	0.820466	0.766497	FALSE	FALSE	FALSE	0.124322	0.19727	314389	ALL	TRUE	reported	0.00273159	5.9e-21	472174	TL	TRUE	reported	textfile	2	TRUE	0.000186783	88.21
rs137901416	A	G	A	G	0.04572	-0.100477	0.100311	0.0609137	FALSE	FALSE	FALSE	0.201315	0.617706	314389	ALL	TRUE	reported	0.00332355	4.7e-43	472174	TL	TRUE	reported	textfile	2	TRUE	0.000400619	189.237
rs139669835	T	C	T	C	-0.0612563	0.431019	0.009365	0.00253807	FALSE	FALSE	FALSE	1.21295	0.722329	314389	ALL	TRUE	reported	0.0105346	6.1e-09	472174	TL	TRUE	reported	textfile	2	TRUE	7.16032e-05	33.8114
rs139795227	C	A	C	A	0.0599379	0.567765	0.014021	0.040639	FALSE	FALSE	FALSE	0.318403	0.074559	314389	ALL	TRUE	reported	0.00873247	6.7e-12	472174	TL	TRUE	reported	textfile	2	TRUE	9.97662e-05	47.1115
rs141214782	TTATC	T	TTATC	T	-0.0246687	-0.0570789	0.101206	0.0989549	FALSE	FALSE	FALSE	0.166154	0.7312	314389	ALL	TRUE	reported	0.00335723	2e-13	472174	TL	TRUE	reported	textfile	2	TRUE	0.000114335	53.9919
rs142426306	T	C	T	C	-0.0504903	-0.0205724	0.039544	0.0405295	FALSE	FALSE	FALSE	0.257945	0.936432	314389	ALL	TRUE	reported	0.00539933	8.7e-21	472174	TL	TRUE	reported	textfile	2	TRUE	0.000185163	87.4449
rs143190905	T	G	T	G	-0.0723995	-0.316999	0.080404	0.0539962	FALSE	FALSE	FALSE	0.191072	0.0971046	314389	ALL	TRUE	reported	0.00369421	1.6e-85	472174	TL	TRUE	reported	textfile	2	TRUE	0.00081278	384.084
rs144204502	T	C	T	C	-0.100574	-0.244003	0.012562	0.0279188	FALSE	FALSE	FALSE	0.269885	0.365943	314389	ALL	TRUE	reported	0.00913369	3.4e-28	472174	TL	TRUE	reported	textfile	2	TRUE	0.000256723	121.249
rs145114957	G	C	G	C	0.0272605	0.0963839	0.042648	0.0431472	FALSE	TRUE	FALSE	0.260593	0.711484	314389	ALL	TRUE	reported	0.00498872	4.6e-08	472174	TL	TRUE	reported	textfile	2	TRUE	6.32353e-05	29.8598
rs150150565	T	C	T	C	0.063762	0.361767	0.021455	0.0228426	FALSE	FALSE	FALSE	0.393533	0.357948	314389	ALL	TRUE	reported	0.00739877	6.8e-18	472174	TL	TRUE	reported	textfile	2	TRUE	0.000157266	74.2682
rs16978028	T	A	T	A	-0.029945	-0.263192	0.143727	0.0609137	FALSE	TRUE	FALSE	0.186358	0.157862	314389	ALL	TRUE	reported	0.00285068	8.2e-26	472174	TL	TRUE	reported	textfile	2	TRUE	0.000233641	110.344
rs17445108	A	G	A	G	-0.0168922	-0.178578	0.12695	0.110212	FALSE	FALSE	FALSE	0.1528	0.242521	314389	ALL	TRUE	reported	0.00300983	2e-08	472174	TL	TRUE	reported	textfile	2	TRUE	6.67049e-05	31.4983
rs182059586	C	T	C	T	-0.0571159	-0.652134	0.02511	0.00253807	FALSE	FALSE	FALSE	0.612041	0.286647	314389	ALL	TRUE	reported	0.00680853	4.9e-17	472174	TL	TRUE	reported	textfile	2	TRUE	0.000149019	70.3729
rs185174247	A	G	A	G	0.0372806	0.211371	0.05609	0.0368468	FALSE	FALSE	FALSE	0.293956	0.472104	314389	ALL	TRUE	reported	0.00435145	1.1e-17	472174	TL	TRUE	reported	textfile	2	TRUE	0.000155428	73.4
rs188918174	T	C	T	C	0.0403062	-0.038535	0.036106	0.0456853	FALSE	FALSE	FALSE	0.239877	0.872373	314389	ALL	TRUE	reported	0.00543604	1.2e-13	472174	TL	TRUE	reported	textfile	2	TRUE	0.00011642	54.9764
rs1907702	A	G	A	G	0.0150247	-0.00389008	0.766771	0.804569	FALSE	FALSE	FALSE	0.12841	0.975832	314389	ALL	TRUE	reported	0.00242651	5.9e-10	472174	TL	TRUE	reported	textfile	2	TRUE	8.11914e-05	38.3394
rs1957937	T	A	T	A	0.0209365	-0.0826143	0.16018	0.167513	FALSE	TRUE	FALSE	0.131505	0.52986	314389	ALL	TRUE	reported	0.00273361	1.9e-14	472174	TL	TRUE	reported	textfile	2	TRUE	0.000124216	58.6588
rs1985369	G	A	G	A	-0.0311893	0.177356	0.868178	0.910481	FALSE	FALSE	FALSE	0.166366	0.286397	314389	ALL	TRUE	reported	0.00300952	3.6e-25	472174	TL	TRUE	reported	textfile	2	TRUE	0.000227413	107.403
rs201009932	T	TA	T	TA	0.0769296	0.605686	0.991068	0.989848	FALSE	FALSE	FALSE	0.342312	0.0768281	314389	ALL	TRUE	reported	0.0116209	3.6e-11	472174	TL	TRUE	reported	textfile	2	TRUE	9.28036e-05	43.8234
rs2056726	A	G	A	G	-0.0228078	-0.123615	0.214376	0.209794	FALSE	FALSE	FALSE	0.120593	0.305336	314389	ALL	TRUE	reported	0.00243638	7.9e-21	472174	TL	TRUE	reported	textfile	2	TRUE	0.000185564	87.6345
rs2230590	C	T	C	T	-0.0158022	-0.0247665	0.510897	0.393401	FALSE	FALSE	FALSE	0.102998	0.809977	314389	ALL	TRUE	reported	0.00200806	3.6e-15	472174	TL	TRUE	reported	textfile	2	TRUE	0.000131136	61.927
rs2282764	G	A	G	A	-0.0224234	-0.428503	0.142384	0.0914004	FALSE	FALSE	FALSE	0.151404	0.004652	314389	ALL	TRUE	reported	0.00289392	9.3e-15	472174	TL	TRUE	reported	textfile	2	TRUE	0.000127137	60.0383
rs2293579	A	G	A	G	-0.012915	0.0528568	0.386274	0.309645	FALSE	FALSE	FALSE	0.110573	0.63263	314389	ALL	TRUE	reported	0.00205481	3.3e-10	472174	TL	TRUE	reported	textfile	2	TRUE	8.36579e-05	39.5042
rs2538745	C	T	C	T	-0.012942	-0.177499	0.602841	0.484772	FALSE	FALSE	FALSE	0.101188	0.0794054	314389	ALL	TRUE	reported	0.002056	3.1e-10	472174	TL	TRUE	reported	textfile	2	TRUE	8.39108e-05	39.6237
rs2555104	C	A	C	A	-0.0139717	-0.0851206	0.434255	0.459391	FALSE	FALSE	FALSE	0.101407	0.401246	314389	ALL	TRUE	reported	0.00203498	6.6e-12	472174	TL	TRUE	reported	textfile	2	TRUE	9.98235e-05	47.1386
rs2763979	T	C	T	C	-0.0277713	0.0414665	0.359721	0.451777	FALSE	FALSE	FALSE	0.102017	0.684402	314389	ALL	TRUE	reported	0.00208092	1.3e-40	472174	TL	TRUE	reported	textfile	2	TRUE	0.000377065	178.107
rs28502153	A	C	A	C	-0.0215916	0.0698178	0.377958	0.388325	FALSE	FALSE	FALSE	0.104918	0.505762	314389	ALL	TRUE	reported	0.00206208	1.2e-25	472174	TL	TRUE	reported	textfile	2	TRUE	0.000232143	109.637
rs28577594	C	G	C	G	0.0187657	-0.057712	0.709829	0.698358	FALSE	TRUE	FALSE	0.112422	0.607705	314389	ALL	TRUE	reported	0.00224024	5.4e-17	472174	TL	TRUE	reported	textfile	2	TRUE	0.000148585	70.1679
rs2967355	C	A	C	A	-0.0461595	-0.135737	0.774276	0.804569	FALSE	FALSE	FALSE	0.132586	0.305943	314389	ALL	TRUE	reported	0.00238972	4e-83	472174	TL	TRUE	reported	textfile	2	TRUE	0.000789556	373.101
rs2977608	C	A	C	A	0.0129483	-0.107244	0.743949	0.667085	FALSE	FALSE	FALSE	0.110103	0.330039	314389	ALL	TRUE	reported	0.00233716	3e-08	472174	TL	TRUE	reported	textfile	2	TRUE	6.50007e-05	30.6935
rs3093888	A	G	A	G	-0.028973	-0.0674726	0.05131	0.0811486	FALSE	FALSE	FALSE	0.181379	0.709895	314389	ALL	TRUE	reported	0.00452459	1.5e-10	472174	TL	TRUE	reported	textfile	2	TRUE	8.68338e-05	41.004
rs35640778	A	G	A	G	-0.209011	-0.598712	0.020757	0.00515577	FALSE	FALSE	FALSE	0.462713	0.195694	314389	ALL	TRUE	reported	0.00702087	9.59e-195	472174	TL	TRUE	reported	textfile	2	TRUE	0.00187344	886.247
rs3767952	A	G	A	G	0.0134472	-0.0906254	0.226709	0.205584	FALSE	FALSE	FALSE	0.122316	0.458747	314389	ALL	TRUE	reported	0.00238826	1.8e-08	472174	TL	TRUE	reported	textfile	2	TRUE	6.71381e-05	31.7029
rs3785074	G	A	G	A	0.023863	-0.0584232	0.289672	0.200508	FALSE	FALSE	FALSE	0.123983	0.637485	314389	ALL	TRUE	reported	0.00220455	2.6e-27	472174	TL	TRUE	reported	textfile	2	TRUE	0.000248085	117.168
rs3891167	G	A	G	A	-0.0425685	-0.0232054	0.253435	0.24672	FALSE	FALSE	FALSE	0.117746	0.843765	314389	ALL	TRUE	reported	0.00239551	1.2e-70	472174	TL	TRUE	reported	textfile	2	TRUE	0.000668326	315.776
rs41269079	A	T	A	T	0.0153617	-0.10888	0.188991	0.190455	FALSE	TRUE	FALSE	0.125059	0.383954	314389	ALL	TRUE	reported	0.0025499	1.7e-09	472174	TL	TRUE	reported	textfile	2	TRUE	7.68594e-05	36.2936
rs41304832	A	G	A	G	0.0611702	-0.0514914	0.012378	0.0366975	FALSE	FALSE	FALSE	0.264763	0.845799	314389	ALL	TRUE	reported	0.0093095	5e-11	472174	TL	TRUE	reported	textfile	2	TRUE	9.14293e-05	43.1743
rs429358	C	T	C	T	0.0173498	-0.0897514	0.153969	0.175127	FALSE	FALSE	FALSE	0.13019	0.490579	314389	ALL	TRUE	reported	0.00277091	3.8e-10	472174	TL	TRUE	reported	textfile	2	TRUE	8.30244e-05	39.2051
rs4498805	T	G	T	G	0.0150601	0.0392481	0.546632	0.515487	FALSE	FALSE	FALSE	0.101561	0.699166	314389	ALL	TRUE	reported	0.00200376	5.7e-14	472174	TL	TRUE	reported	textfile	2	TRUE	0.000119622	56.4888
rs4530278	T	G	T	G	0.0138793	0.132585	0.59815	0.63627	FALSE	FALSE	FALSE	0.10359	0.200582	314389	ALL	TRUE	reported	0.0020567	1.5e-11	472174	TL	TRUE	reported	textfile	2	TRUE	9.64382e-05	45.5398
rs45604339	T	C	T	C	-0.020433	-0.0787413	0.34242	0.36809	FALSE	FALSE	FALSE	0.103884	0.448466	314389	ALL	TRUE	reported	0.00211433	4.3e-22	472174	TL	TRUE	reported	textfile	2	TRUE	0.000197756	93.3936
rs4695407	G	A	G	A	0.0141511	-0.124947	0.507843	0.439664	FALSE	FALSE	FALSE	0.101307	0.217444	314389	ALL	TRUE	reported	0.00199925	1.5e-12	472174	TL	TRUE	reported	textfile	2	TRUE	0.000106096	50.1008
rs4724	A	G	A	G	-0.0547446	-0.103808	0.116598	0.101672	FALSE	FALSE	FALSE	0.160655	0.51818	314389	ALL	TRUE	reported	0.00312441	9.8e-69	472174	TL	TRUE	reported	textfile	2	TRUE	0.000649774	307.004
rs4731541	G	C	G	C	-0.0206119	0.0450228	0.624901	0.647228	FALSE	TRUE	FALSE	0.105199	0.668667	314389	ALL	TRUE	reported	0.00205962	1.4e-23	472174	TL	TRUE	reported	textfile	2	TRUE	0.000212064	100.152
rs4743037	T	C	T	C	0.0147971	0.0571378	0.230874	0.228456	FALSE	FALSE	FALSE	0.12307	0.642455	314389	ALL	TRUE	reported	0.00238094	5.1e-10	472174	TL	TRUE	reported	textfile	2	TRUE	8.17935e-05	38.6238
rs55747751	A	G	A	G	-0.0211612	0.0572914	0.077375	0.0598288	FALSE	FALSE	FALSE	0.219638	0.794213	314389	ALL	TRUE	reported	0.00375164	1.7e-08	472174	TL	TRUE	reported	textfile	2	TRUE	6.73763e-05	31.8153
rs56799554	G	A	G	A	-0.0259793	0.0684247	0.170183	0.247059	FALSE	FALSE	FALSE	0.120913	0.571463	314389	ALL	TRUE	reported	0.00267858	3e-22	472174	TL	TRUE	reported	textfile	2	TRUE	0.000199185	94.0684
rs5742915	C	T	C	T	0.0193377	-0.00705818	0.445829	0.406091	FALSE	FALSE	FALSE	0.103125	0.945433	314389	ALL	TRUE	reported	0.00202886	1.6e-21	472174	TL	TRUE	reported	textfile	2	TRUE	0.000192362	90.8455
rs59409453	G	A	G	A	0.0202133	0.0538212	0.730602	0.801642	FALSE	FALSE	FALSE	0.124788	0.66625	314389	ALL	TRUE	reported	0.00230175	1.6e-18	472174	TL	TRUE	reported	textfile	2	TRUE	0.0001633	77.1181
rs6007020	C	T	C	T	0.0144904	0.189665	0.367823	0.401772	FALSE	FALSE	FALSE	0.105466	0.0721224	314389	ALL	TRUE	reported	0.00209637	4.8e-12	472174	TL	TRUE	reported	textfile	2	TRUE	0.000101176	47.7775
rs6054257	A	G	A	G	-0.0141684	0.0285525	0.793522	0.805912	FALSE	FALSE	FALSE	0.127403	0.822671	314389	ALL	TRUE	reported	0.00247729	1.1e-08	472174	TL	TRUE	reported	textfile	2	TRUE	6.92717e-05	32.7104
rs611646	A	T	A	T	-0.0368309	-0.11177	0.408685	0.373246	FALSE	TRUE	FALSE	0.103393	0.279691	314389	ALL	TRUE	reported	0.00203547	3.5e-73	472174	TL	TRUE	reported	textfile	2	TRUE	0.000692934	327.411
rs61748181	T	C	T	C	-0.059181	-0.129039	0.028928	0.0473674	FALSE	FALSE	FALSE	0.225953	0.567942	314389	ALL	TRUE	reported	0.00595394	2.8e-23	472174	TL	TRUE	reported	textfile	2	TRUE	0.000209201	98.7993
rs6536702	A	G	A	G	0.0534148	-0.0387264	0.774647	0.811904	FALSE	FALSE	FALSE	0.130994	0.76751	314389	ALL	TRUE	reported	0.00238875	9.4e-111	472174	TL	TRUE	reported	textfile	2	TRUE	0.00105784	500.011
rs6584579	G	A	G	A	0.0114923	0.0645808	0.398876	0.341037	FALSE	FALSE	FALSE	0.108209	0.550633	314389	ALL	TRUE	reported	0.00204674	2e-08	472174	TL	TRUE	reported	textfile	2	TRUE	6.67663e-05	31.5273
rs6587577	G	A	G	A	-0.0182148	0.113577	0.826346	0.85533	FALSE	FALSE	FALSE	0.138928	0.41363	314389	ALL	TRUE	reported	0.0026359	4.8e-12	472174	TL	TRUE	reported	textfile	2	TRUE	0.000101122	47.7517
rs6659669	T	C	T	C	-0.0117091	0.0996885	0.605095	0.609366	FALSE	FALSE	FALSE	0.102112	0.328933	314389	ALL	TRUE	reported	0.00205167	1.1e-08	472174	TL	TRUE	reported	textfile	2	TRUE	6.89763e-05	32.5709
rs6669563	A	G	A	G	0.0182358	0.0604553	0.437768	0.484722	FALSE	FALSE	FALSE	0.101855	0.552818	314389	ALL	TRUE	reported	0.00202476	2.1e-19	472174	TL	TRUE	reported	textfile	2	TRUE	0.000171762	81.1149
rs66731853	A	G	A	G	-0.0177791	-0.116376	0.317304	0.175764	FALSE	FALSE	FALSE	0.128492	0.365088	314389	ALL	TRUE	reported	0.00215421	1.5e-16	472174	TL	TRUE	reported	textfile	2	TRUE	0.000144238	68.1148
rs6751209	C	T	C	T	-0.0140465	-0.0377208	0.204231	0.175475	FALSE	FALSE	FALSE	0.131714	0.774585	314389	ALL	TRUE	reported	0.00248465	1.6e-08	472174	TL	TRUE	reported	textfile	2	TRUE	6.76822e-05	31.9598
rs6776756	A	G	A	G	-0.0174439	0.0462448	0.597562	0.545158	FALSE	FALSE	FALSE	0.102838	0.652938	314389	ALL	TRUE	reported	0.00203747	1.1e-17	472174	TL	TRUE	reported	textfile	2	TRUE	0.000155216	73.2998
rs6881568	A	C	A	C	0.0169256	-0.0536427	0.36258	0.260555	FALSE	FALSE	FALSE	0.114057	0.638131	314389	ALL	TRUE	reported	0.00207735	3.7e-16	472174	TL	TRUE	reported	textfile	2	TRUE	0.000140574	66.3845
rs7164950	G	A	G	A	0.0129362	-0.0640255	0.405979	0.403066	FALSE	FALSE	FALSE	0.103263	0.535242	314389	ALL	TRUE	reported	0.00204001	2.3e-10	472174	TL	TRUE	reported	textfile	2	TRUE	8.51549e-05	40.2112
rs7209057	A	G	A	G	0.011819	0.00607856	0.561044	0.552752	FALSE	FALSE	FALSE	0.101672	0.952326	314389	ALL	TRUE	reported	0.00202865	5.7e-09	472174	TL	TRUE	reported	textfile	2	TRUE	7.1881e-05	33.9426
rs7221585	T	C	T	C	0.0143271	0.0604816	0.22401	0.299492	FALSE	FALSE	FALSE	0.111766	0.588407	314389	ALL	TRUE	reported	0.00247042	6.7e-09	472174	TL	TRUE	reported	textfile	2	TRUE	7.12266e-05	33.6336
rs73581419	T	C	T	C	0.0229838	-0.0732326	0.106605	0.0761421	FALSE	FALSE	FALSE	0.185197	0.692526	314389	ALL	TRUE	reported	0.00324156	1.3e-12	472174	TL	TRUE	reported	textfile	2	TRUE	0.00010646	50.2729
rs75664430	G	C	G	C	-0.0235179	0.146324	0.248028	0.213118	FALSE	TRUE	FALSE	0.128792	0.255903	314389	ALL	TRUE	reported	0.0023186	3.6e-24	472174	TL	TRUE	reported	textfile	2	TRUE	0.000217846	102.883
rs76065543	T	C	T	C	0.0342843	0.114867	0.137527	0.200508	FALSE	FALSE	FALSE	0.130946	0.380374	314389	ALL	TRUE	reported	0.00290708	4.2e-32	472174	TL	TRUE	reported	textfile	2	TRUE	0.000294474	139.083
rs76094497	A	G	A	G	0.0278689	0.00685739	0.051569	0.0253807	FALSE	FALSE	FALSE	0.323618	0.983094	314389	ALL	TRUE	reported	0.00461731	1.6e-09	472174	TL	TRUE	reported	textfile	2	TRUE	7.71482e-05	36.43
rs76219171	A	G	A	G	0.0359839	-0.367301	0.058433	0.0228426	FALSE	FALSE	FALSE	0.273802	0.179764	314389	ALL	TRUE	reported	0.00431741	7.8e-17	472174	TL	TRUE	reported	textfile	2	TRUE	0.000147097	69.4653
rs762679	A	T	A	T	0.0310104	0.177561	0.856501	0.856285	FALSE	TRUE	FALSE	0.136234	0.192454	314389	ALL	TRUE	reported	0.00285024	1.4e-27	472174	TL	TRUE	reported	textfile	2	TRUE	0.000250635	118.372
rs76666449	C	T	C	T	0.0295125	0.177202	0.100625	0.157719	FALSE	FALSE	FALSE	0.146969	0.227929	314389	ALL	TRUE	reported	0.00333186	8.2e-19	472174	TL	TRUE	reported	textfile	2	TRUE	0.000166136	78.4579
rs77231040	C	G	C	G	0.0989303	0.20921	0.005742	0.0304569	FALSE	TRUE	FALSE	0.322208	0.516145	314389	ALL	TRUE	reported	0.0134649	2e-13	472174	TL	TRUE	reported	textfile	2	TRUE	0.000114314	53.9822
rs7726159	A	C	A	C	0.0707719	0.104467	0.327295	0.350333	FALSE	FALSE	FALSE	0.107606	0.331632	314389	ALL	TRUE	reported	0.0021282	1e-200	472174	TL	TRUE	reported	textfile	2	TRUE	0.00233657	1105.85
rs7772289	T	G	T	G	0.017549	0.0100228	0.503081	0.614213	FALSE	FALSE	FALSE	0.103727	0.923023	314389	ALL	TRUE	reported	0.00200003	1.7e-18	472174	TL	TRUE	reported	textfile	2	TRUE	0.000163027	76.9892
rs77732866	A	G	A	G	0.0177942	-0.0177702	0.137597	0.142202	FALSE	FALSE	FALSE	0.143653	0.901551	314389	ALL	TRUE	reported	0.00290595	9.2e-10	472174	TL	TRUE	reported	textfile	2	TRUE	7.94043e-05	37.4955
rs7790856	T	C	T	C	-0.0437199	-0.192605	0.289139	0.195232	FALSE	FALSE	FALSE	0.121078	0.111666	314389	ALL	TRUE	reported	0.00220526	1.8e-87	472174	TL	TRUE	reported	textfile	2	TRUE	0.000831716	393.04
rs78491606	C	A	C	A	-0.0756311	-0.197298	0.018433	0.0228426	FALSE	FALSE	FALSE	0.308912	0.523027	314389	ALL	TRUE	reported	0.00741168	1.9e-24	472174	TL	TRUE	reported	textfile	2	TRUE	0.00022048	104.128
rs79977579	A	C	A	C	0.0281517	-0.119614	0.09555	0.0862646	FALSE	FALSE	FALSE	0.172347	0.487663	314389	ALL	TRUE	reported	0.00343182	2.3e-16	472174	TL	TRUE	reported	textfile	2	TRUE	0.000142494	67.2912
rs80116508	A	G	A	G	-0.0352672	-0.131391	0.062356	0.0685279	FALSE	FALSE	FALSE	0.187996	0.484612	314389	ALL	TRUE	reported	0.00415151	2e-17	472174	TL	TRUE	reported	textfile	2	TRUE	0.000152813	72.1652
rs80324517	A	G	A	G	0.0396515	0.381948	0.048259	0.0813974	FALSE	FALSE	FALSE	0.213789	0.0740082	314389	ALL	TRUE	reported	0.00466286	1.8e-17	472174	TL	TRUE	reported	textfile	2	TRUE	0.000153125	72.3124
rs8102497	A	G	A	G	-0.0149654	0.0432142	0.431828	0.464268	FALSE	FALSE	FALSE	0.10197	0.671718	314389	ALL	TRUE	reported	0.0020233	1.4e-13	472174	TL	TRUE	reported	textfile	2	TRUE	0.000115852	54.7084
rs8105767	G	A	G	A	0.0328384	0.00106914	0.29467	0.314721	FALSE	FALSE	FALSE	0.10968	0.992222	314389	ALL	TRUE	reported	0.00220117	2.5e-50	472174	TL	TRUE	reported	textfile	2	TRUE	0.00047114	222.564
rs869785	C	T	C	T	-0.0147303	-0.12244	0.672471	0.630536	FALSE	FALSE	FALSE	0.10616	0.248765	314389	ALL	TRUE	reported	0.00212801	4.4e-12	472174	TL	TRUE	reported	textfile	2	TRUE	0.000101468	47.9153
rs871134	T	C	T	C	-0.0182986	-0.194773	0.569032	0.504469	FALSE	FALSE	FALSE	0.101977	0.0561371	314389	ALL	TRUE	reported	0.0020263	1.7e-19	472174	TL	TRUE	reported	textfile	2	TRUE	0.000172684	81.5505
rs932002	T	C	T	C	-0.0402052	-0.0175347	0.150843	0.236041	FALSE	FALSE	FALSE	0.118314	0.882182	314389	ALL	TRUE	reported	0.00279667	7.3e-47	472174	TL	TRUE	reported	textfile	2	TRUE	0.000437512	206.671
rs9398196	G	A	G	A	-0.0143586	0.0399557	0.52005	0.629471	FALSE	FALSE	FALSE	0.104741	0.702854	314389	ALL	TRUE	reported	0.00201175	9.5e-13	472174	TL	TRUE	reported	textfile	2	TRUE	0.000107877	50.9418
rs939916	A	G	A	G	0.0241795	-0.100261	0.669967	0.71282	FALSE	FALSE	FALSE	0.114749	0.382261	314389	ALL	TRUE	reported	0.00216724	6.6e-29	472174	TL	TRUE	reported	textfile	2	TRUE	0.000263551	124.474
rs9419958	C	T	C	T	-0.0810098	0.00596504	0.86139	0.886772	FALSE	FALSE	FALSE	0.160332	0.970322	314389	ALL	TRUE	reported	0.00293847	2.6e-167	472174	TL	TRUE	reported	textfile	2	TRUE	0.00160706	760.03
rs9878436	T	C	T	C	-0.0143407	0.0933192	0.434393	0.377715	FALSE	FALSE	FALSE	0.105918	0.378288	314389	ALL	TRUE	reported	0.00201819	1.2e-12	472174	TL	TRUE	reported	textfile	2	TRUE	0.000106922	50.4911
rs9955360	A	C	A	C	-0.0190311	-0.130511	0.869288	0.836737	FALSE	FALSE	FALSE	0.143844	0.364244	314389	ALL	TRUE	reported	0.00299791	2.2e-10	472174	TL	TRUE	reported	textfile	2	TRUE	8.53398e-05	40.2985

## Sheet: acute myeloid leukemia
SNP	effect_allele.exposure	other_allele.exposure	effect_allele.outcome	other_allele.outcome	beta.exposure	beta.outcome	eaf.exposure	eaf.outcome	remove	palindromic	ambiguous	se.outcome	pval.outcome	samplesize.outcome	outcome	mr_keep.outcome	pval_origin.outcome	se.exposure	pval.exposure	samplesize.exposure	exposure	mr_keep.exposure	pval_origin.exposure	data_source.exposure	action	mr_keep	R2	F
rs1003322	A	C	A	C	0.0141734	-0.0525015	0.213742	0.140084	FALSE	FALSE	FALSE	0.129174	0.684419	314436	AML	TRUE	reported	0.00247546	1e-08	472174	TL	TRUE	reported	textfile	2	TRUE	6.94231e-05	32.7819
rs10112752	A	G	A	G	-0.0287522	0.179831	0.430369	0.492197	FALSE	FALSE	FALSE	0.0913551	0.0490129	314436	AML	TRUE	reported	0.00202518	9.5e-46	472174	TL	TRUE	reported	textfile	2	TRUE	0.000426705	201.564
rs1023767	A	G	A	G	-0.0183732	-0.00975339	0.237595	0.37631	FALSE	FALSE	FALSE	0.0936403	0.917044	314436	AML	TRUE	reported	0.00234772	5e-15	472174	TL	TRUE	reported	textfile	2	TRUE	0.000129694	61.2456
rs10768683	G	C	G	C	0.0469922	0.052019	0.841033	0.800217	FALSE	TRUE	FALSE	0.112315	0.643255	314436	AML	TRUE	reported	0.00277015	1.5e-64	472174	TL	TRUE	reported	textfile	2	TRUE	0.000609086	287.768
rs10773176	G	A	G	A	-0.0172009	0.0146168	0.741214	0.811805	FALSE	FALSE	FALSE	0.116113	0.899824	314436	AML	TRUE	reported	0.00228534	5.2e-14	472174	TL	TRUE	reported	textfile	2	TRUE	0.000119963	56.6499
rs10774624	A	G	A	G	0.0149944	-0.10441	0.53276	0.571271	FALSE	FALSE	FALSE	0.0931005	0.262084	314436	AML	TRUE	reported	0.00205494	2.9e-13	472174	TL	TRUE	reported	textfile	2	TRUE	0.000112748	53.2425
rs10805346	C	T	C	T	0.0117072	-0.0536332	0.439339	0.438854	FALSE	FALSE	FALSE	0.091677	0.558532	314436	AML	TRUE	reported	0.00202147	7e-09	472174	TL	TRUE	reported	textfile	2	TRUE	7.10295e-05	33.5405
rs10840270	G	C	G	C	0.014383	-0.00861631	0.655684	0.664674	FALSE	TRUE	FALSE	0.0965884	0.928918	314436	AML	TRUE	reported	0.00212494	1.3e-11	472174	TL	TRUE	reported	textfile	2	TRUE	9.702e-05	45.8146
rs10845387	A	G	A	G	-0.0141214	0.0414961	0.352666	0.355119	FALSE	FALSE	FALSE	0.0976144	0.670761	314436	AML	TRUE	reported	0.00209396	1.5e-11	472174	TL	TRUE	reported	textfile	2	TRUE	9.63108e-05	45.4796
rs10905255	T	G	T	G	-0.0182493	-0.135506	0.57919	0.52668	FALSE	FALSE	FALSE	0.0919076	0.140381	314436	AML	TRUE	reported	0.00203099	2.6e-19	472174	TL	TRUE	reported	textfile	2	TRUE	0.000170962	80.7374
rs10936598	C	A	C	A	-0.0656433	-0.171611	0.32379	0.309651	FALSE	FALSE	FALSE	0.0956468	0.0727797	314436	AML	TRUE	reported	0.00214663	1e-200	472174	TL	TRUE	reported	textfile	2	TRUE	0.00197654	935.114
rs11085072	T	C	T	C	-0.0131806	-0.0606184	0.236909	0.152748	FALSE	FALSE	FALSE	0.124594	0.626592	314436	AML	TRUE	reported	0.00236713	2.6e-08	472174	TL	TRUE	reported	textfile	2	TRUE	6.56592e-05	31.0045
rs11117354	C	T	C	T	0.0232506	-0.147352	0.696513	0.541249	FALSE	FALSE	FALSE	0.092167	0.109876	314436	AML	TRUE	reported	0.00219601	3.4e-26	472174	TL	TRUE	reported	textfile	2	TRUE	0.000237353	112.098
rs111527438	C	T	C	T	0.0125	0.177327	0.351251	0.358398	FALSE	FALSE	FALSE	0.0976842	0.0694752	314436	AML	TRUE	reported	0.00211016	3.1e-09	472174	TL	TRUE	reported	textfile	2	TRUE	7.43113e-05	35.0903
rs112394943	C	T	C	T	-0.0198961	0.205871	0.162741	0.272806	FALSE	FALSE	FALSE	0.108756	0.0583647	314436	AML	TRUE	reported	0.00281641	1.6e-12	472174	TL	TRUE	reported	textfile	2	TRUE	0.000105681	49.9048
rs11557154	T	C	T	C	-0.0343719	0.29076	0.13003	0.162866	FALSE	FALSE	FALSE	0.134936	0.0311781	314436	AML	TRUE	reported	0.00298538	1.1e-30	472174	TL	TRUE	reported	textfile	2	TRUE	0.000280662	132.558
rs11579626	C	A	C	A	0.0265113	-0.0314182	0.084882	0.117181	FALSE	FALSE	FALSE	0.13962	0.821958	314436	AML	TRUE	reported	0.00357752	1.3e-13	472174	TL	TRUE	reported	textfile	2	TRUE	0.000116291	54.9156
rs11584821	T	C	T	C	-0.0306517	-0.0237848	0.176208	0.175924	FALSE	FALSE	FALSE	0.118701	0.841187	314436	AML	TRUE	reported	0.00263623	3e-31	472174	TL	TRUE	reported	textfile	2	TRUE	0.000286231	135.189
rs116863223	A	G	A	G	-0.0817874	-0.343506	0.011763	0.01027	FALSE	FALSE	FALSE	0.368734	0.351552	314436	AML	TRUE	reported	0.00937157	2.6e-18	472174	TL	TRUE	reported	textfile	2	TRUE	0.000161278	76.1634
rs11699829	A	G	A	G	0.0641957	0.118476	0.034146	0.0176149	FALSE	FALSE	FALSE	0.374283	0.751592	314436	AML	TRUE	reported	0.00602028	1.5e-26	472174	TL	TRUE	reported	textfile	2	TRUE	0.000240753	113.704
rs117034449	A	G	A	G	0.0374377	-0.118828	0.023304	0.0143443	FALSE	FALSE	FALSE	0.363878	0.744	314436	AML	TRUE	reported	0.00667898	2.1e-08	472174	TL	TRUE	reported	textfile	2	TRUE	6.65376e-05	31.4193
rs117407747	T	C	T	C	0.0450533	0.222151	0.027571	0.012504	FALSE	FALSE	FALSE	0.457315	0.627129	314436	AML	TRUE	reported	0.00611706	1.8e-13	472174	TL	TRUE	reported	textfile	2	TRUE	0.000114872	54.2458
rs11746381	C	T	C	T	0.0329955	0.0138972	0.0568	0.0717213	FALSE	FALSE	FALSE	0.177714	0.937669	314436	AML	TRUE	reported	0.00431036	1.9e-14	472174	TL	TRUE	reported	textfile	2	TRUE	0.000124087	58.5977
rs117512405	A	G	A	G	-0.0790134	-0.499262	0.017043	0.0292912	FALSE	FALSE	FALSE	0.202483	0.0136748	314436	AML	TRUE	reported	0.00824611	9.5e-22	472174	TL	TRUE	reported	textfile	2	TRUE	0.000194409	91.8124
rs117630647	A	G	A	G	0.059565	-0.273253	0.021346	0.0122951	FALSE	FALSE	FALSE	0.35627	0.443092	314436	AML	TRUE	reported	0.00720413	1.4e-16	472174	TL	TRUE	reported	textfile	2	TRUE	0.000144762	68.3624
rs11769630	A	T	A	T	-0.0256807	-0.346829	0.072227	0.0719624	FALSE	TRUE	FALSE	0.149349	0.020219	314436	AML	TRUE	reported	0.00389475	4.3e-11	472174	TL	TRUE	reported	textfile	2	TRUE	9.20688e-05	43.4763
rs11991877	A	T	A	T	-0.030138	0.0291095	0.889309	0.860656	FALSE	TRUE	FALSE	0.129782	0.822528	314436	AML	TRUE	reported	0.00318686	3.2e-21	472174	TL	TRUE	reported	textfile	2	TRUE	0.000189373	89.4337
rs12369950	C	T	C	T	-0.0178308	0.0650348	0.140675	0.156148	FALSE	FALSE	FALSE	0.128435	0.612601	314436	AML	TRUE	reported	0.00290205	8e-10	472174	TL	TRUE	reported	textfile	2	TRUE	7.99457e-05	37.7511
rs12412214	A	G	A	G	-0.0245174	-0.0323132	0.279765	0.385294	FALSE	FALSE	FALSE	0.0930426	0.72837	314436	AML	TRUE	reported	0.00222685	3.4e-28	472174	TL	TRUE	reported	textfile	2	TRUE	0.000256657	121.217
rs12451892	C	T	C	T	-0.0116145	-0.118544	0.380511	0.408333	FALSE	FALSE	FALSE	0.0921168	0.198132	314436	AML	TRUE	reported	0.00207578	2.2e-08	472174	TL	TRUE	reported	textfile	2	TRUE	6.62991e-05	31.3066
rs1291143	C	A	C	A	0.0493145	-0.102798	0.849026	0.758631	FALSE	FALSE	FALSE	0.109402	0.347407	314436	AML	TRUE	reported	0.0027991	1.8e-69	472174	TL	TRUE	reported	textfile	2	TRUE	0.000656939	310.392
rs12925933	C	A	C	A	-0.0146622	-0.199751	0.66221	0.491538	FALSE	FALSE	FALSE	0.0918884	0.0297173	314436	AML	TRUE	reported	0.00213796	7e-12	472174	TL	TRUE	reported	textfile	2	TRUE	9.95987e-05	47.0324
rs12932179	G	A	G	A	-0.0136257	-0.0463535	0.561399	0.605698	FALSE	FALSE	FALSE	0.0933016	0.61932	314436	AML	TRUE	reported	0.0020276	1.8e-11	472174	TL	TRUE	reported	textfile	2	TRUE	9.56334e-05	45.1597
rs13062095	C	T	C	T	0.0138552	-0.0695045	0.327843	0.357634	FALSE	FALSE	FALSE	0.0939643	0.459488	314436	AML	TRUE	reported	0.00214113	9.7e-11	472174	TL	TRUE	reported	textfile	2	TRUE	8.86745e-05	41.8733
rs131797	T	TAAAAA	T	TAAAAA	0.0243752	-0.0768493	0.235625	0.170749	FALSE	FALSE	FALSE	0.117898	0.514513	314436	AML	TRUE	reported	0.00236561	6.8e-25	472174	TL	TRUE	reported	textfile	2	TRUE	0.000224807	106.172
rs13230646	C	T	C	T	-0.0173277	-0.0594363	0.248945	0.164015	FALSE	FALSE	FALSE	0.120166	0.62087	314436	AML	TRUE	reported	0.00232377	8.9e-14	472174	TL	TRUE	reported	textfile	2	TRUE	0.000117745	55.6024
rs1332941	G	A	G	A	0.0256552	0.0917351	0.820466	0.807168	FALSE	FALSE	FALSE	0.111753	0.411719	314436	AML	TRUE	reported	0.00273159	5.9e-21	472174	TL	TRUE	reported	textfile	2	TRUE	0.000186783	88.21
rs137901416	A	G	A	G	0.04572	-0.0584005	0.100311	0.0619335	FALSE	FALSE	FALSE	0.183964	0.750898	314436	AML	TRUE	reported	0.00332355	4.7e-43	472174	TL	TRUE	reported	textfile	2	TRUE	0.000400619	189.237
rs139669835	T	C	T	C	-0.0612563	0.231416	0.009365	0.00204918	FALSE	FALSE	FALSE	1.16699	0.842809	314436	AML	TRUE	reported	0.0105346	6.1e-09	472174	TL	TRUE	reported	textfile	2	TRUE	7.16032e-05	33.8114
rs139795227	C	A	C	A	0.0599379	0.150112	0.014021	0.0308904	FALSE	FALSE	FALSE	0.281975	0.594478	314436	AML	TRUE	reported	0.00873247	6.7e-12	472174	TL	TRUE	reported	textfile	2	TRUE	9.97662e-05	47.1115
rs141214782	TTATC	T	TTATC	T	-0.0246687	0.0615228	0.101206	0.112134	FALSE	FALSE	FALSE	0.14741	0.676418	314436	AML	TRUE	reported	0.00335723	2e-13	472174	TL	TRUE	reported	textfile	2	TRUE	0.000114335	53.9919
rs142426306	T	C	T	C	-0.0504903	-0.105476	0.039544	0.0365558	FALSE	FALSE	FALSE	0.233649	0.651681	314436	AML	TRUE	reported	0.00539933	8.7e-21	472174	TL	TRUE	reported	textfile	2	TRUE	0.000185163	87.4449
rs143190905	T	G	T	G	-0.0723995	0.142655	0.080404	0.0875763	FALSE	FALSE	FALSE	0.169844	0.400954	314436	AML	TRUE	reported	0.00369421	1.6e-85	472174	TL	TRUE	reported	textfile	2	TRUE	0.00081278	384.084
rs144204502	T	C	T	C	-0.100574	-0.422469	0.012562	0.022541	FALSE	FALSE	FALSE	0.239294	0.0774819	314436	AML	TRUE	reported	0.00913369	3.4e-28	472174	TL	TRUE	reported	textfile	2	TRUE	0.000256723	121.249
rs145114957	G	C	G	C	0.0272605	0.0227524	0.042648	0.0409836	FALSE	TRUE	FALSE	0.231267	0.921629	314436	AML	TRUE	reported	0.00498872	4.6e-08	472174	TL	TRUE	reported	textfile	2	TRUE	6.32353e-05	29.8598
rs150150565	T	C	T	C	0.063762	-0.113819	0.021455	0.0163934	FALSE	FALSE	FALSE	0.339722	0.737598	314436	AML	TRUE	reported	0.00739877	6.8e-18	472174	TL	TRUE	reported	textfile	2	TRUE	0.000157266	74.2682
rs16978028	T	A	T	A	-0.029945	0.117223	0.143727	0.0871103	FALSE	TRUE	FALSE	0.168447	0.486489	314436	AML	TRUE	reported	0.00285068	8.2e-26	472174	TL	TRUE	reported	textfile	2	TRUE	0.000233641	110.344
rs17445108	A	G	A	G	-0.0168922	0.0871392	0.12695	0.136708	FALSE	FALSE	FALSE	0.137837	0.527261	314436	AML	TRUE	reported	0.00300983	2e-08	472174	TL	TRUE	reported	textfile	2	TRUE	6.67049e-05	31.4983
rs17677991	G	C	G	C	0.0222664	0.040284	0.342123	0.404468	FALSE	TRUE	FALSE	0.0928704	0.664459	314436	AML	TRUE	reported	0.00210806	4.4e-26	472174	TL	TRUE	reported	textfile	2	TRUE	0.000236227	111.566
rs182059586	C	T	C	T	-0.0571159	0.209134	0.02511	0.0082369	FALSE	FALSE	FALSE	0.554293	0.705952	314436	AML	TRUE	reported	0.00680853	4.9e-17	472174	TL	TRUE	reported	textfile	2	TRUE	0.000149019	70.3729
rs185174247	A	G	A	G	0.0372806	-0.306791	0.05609	0.0206766	FALSE	FALSE	FALSE	0.270296	0.256367	314436	AML	TRUE	reported	0.00435145	1.1e-17	472174	TL	TRUE	reported	textfile	2	TRUE	0.000155428	73.4
rs188918174	T	C	T	C	0.0403062	-0.41392	0.036106	0.0288412	FALSE	FALSE	FALSE	0.21645	0.0558354	314436	AML	TRUE	reported	0.00543604	1.2e-13	472174	TL	TRUE	reported	textfile	2	TRUE	0.00011642	54.9764
rs1907702	A	G	A	G	0.0150247	0.0548798	0.766771	0.809426	FALSE	FALSE	FALSE	0.113974	0.630153	314436	AML	TRUE	reported	0.00242651	5.9e-10	472174	TL	TRUE	reported	textfile	2	TRUE	8.11914e-05	38.3394
rs1985369	G	A	G	A	-0.0311893	-0.0296221	0.868178	0.890718	FALSE	FALSE	FALSE	0.148721	0.842123	314436	AML	TRUE	reported	0.00300952	3.6e-25	472174	TL	TRUE	reported	textfile	2	TRUE	0.000227413	107.403
rs201009932	T	TA	T	TA	0.0769296	-0.608818	0.991068	0.963275	FALSE	FALSE	FALSE	0.304987	0.0459113	314436	AML	TRUE	reported	0.0116209	3.6e-11	472174	TL	TRUE	reported	textfile	2	TRUE	9.28036e-05	43.8234
rs2056726	A	G	A	G	-0.0228078	0.00503056	0.214376	0.22635	FALSE	FALSE	FALSE	0.10912	0.96323	314436	AML	TRUE	reported	0.00243638	7.9e-21	472174	TL	TRUE	reported	textfile	2	TRUE	0.000185564	87.6345
rs2230590	C	T	C	T	-0.0158022	0.00334498	0.510897	0.395492	FALSE	FALSE	FALSE	0.0930687	0.971329	314436	AML	TRUE	reported	0.00200806	3.6e-15	472174	TL	TRUE	reported	textfile	2	TRUE	0.000131136	61.927
rs2282764	G	A	G	A	-0.0224234	0.177846	0.142384	0.163934	FALSE	FALSE	FALSE	0.130617	0.173329	314436	AML	TRUE	reported	0.00289392	9.3e-15	472174	TL	TRUE	reported	textfile	2	TRUE	0.000127137	60.0383
rs2293579	A	G	A	G	-0.012915	0.0395709	0.386274	0.311315	FALSE	FALSE	FALSE	0.0986387	0.688296	314436	AML	TRUE	reported	0.00205481	3.3e-10	472174	TL	TRUE	reported	textfile	2	TRUE	8.36579e-05	39.5042
rs2538745	C	T	C	T	-0.012942	-0.18264	0.602841	0.482602	FALSE	FALSE	FALSE	0.0909191	0.0445564	314436	AML	TRUE	reported	0.002056	3.1e-10	472174	TL	TRUE	reported	textfile	2	TRUE	8.39108e-05	39.6237
rs2555104	C	A	C	A	-0.0139717	0.0648341	0.434255	0.495926	FALSE	FALSE	FALSE	0.0910245	0.476297	314436	AML	TRUE	reported	0.00203498	6.6e-12	472174	TL	TRUE	reported	textfile	2	TRUE	9.98235e-05	47.1386
rs2763979	T	C	T	C	-0.0277713	-0.207788	0.359721	0.385246	FALSE	FALSE	FALSE	0.0918487	0.0236799	314436	AML	TRUE	reported	0.00208092	1.3e-40	472174	TL	TRUE	reported	textfile	2	TRUE	0.000377065	178.107
rs28502153	A	C	A	C	-0.0215916	-0.0116238	0.377958	0.370178	FALSE	FALSE	FALSE	0.0942684	0.901865	314436	AML	TRUE	reported	0.00206208	1.2e-25	472174	TL	TRUE	reported	textfile	2	TRUE	0.000232143	109.637
rs28577594	C	G	C	G	0.0187657	0.146078	0.709829	0.738348	FALSE	TRUE	FALSE	0.100265	0.145138	314436	AML	TRUE	reported	0.00224024	5.4e-17	472174	TL	TRUE	reported	textfile	2	TRUE	0.000148585	70.1679
rs2967355	C	A	C	A	-0.0461595	-0.147011	0.774276	0.806003	FALSE	FALSE	FALSE	0.119998	0.220534	314436	AML	TRUE	reported	0.00238972	4e-83	472174	TL	TRUE	reported	textfile	2	TRUE	0.000789556	373.101
rs2977608	C	A	C	A	0.0129483	-0.0331011	0.743949	0.684619	FALSE	FALSE	FALSE	0.0989623	0.738016	314436	AML	TRUE	reported	0.00233716	3e-08	472174	TL	TRUE	reported	textfile	2	TRUE	6.50007e-05	30.6935
rs3093888	A	G	A	G	-0.028973	0.00485201	0.05131	0.0897943	FALSE	FALSE	FALSE	0.159056	0.975664	314436	AML	TRUE	reported	0.00452459	1.5e-10	472174	TL	TRUE	reported	textfile	2	TRUE	8.68338e-05	41.004
rs35640778	A	G	A	G	-0.209011	0.102811	0.020757	0.0143443	FALSE	FALSE	FALSE	0.402746	0.79851	314436	AML	TRUE	reported	0.00702087	9.59e-195	472174	TL	TRUE	reported	textfile	2	TRUE	0.00187344	886.247
rs3767952	A	G	A	G	0.0134472	0.233105	0.226709	0.264344	FALSE	FALSE	FALSE	0.109124	0.0326678	314436	AML	TRUE	reported	0.00238826	1.8e-08	472174	TL	TRUE	reported	textfile	2	TRUE	6.71381e-05	31.7029
rs3785074	G	A	G	A	0.023863	-0.0659284	0.289672	0.196745	FALSE	FALSE	FALSE	0.112128	0.556548	314436	AML	TRUE	reported	0.00220455	2.6e-27	472174	TL	TRUE	reported	textfile	2	TRUE	0.000248085	117.168
rs3891167	G	A	G	A	-0.0425685	0.062332	0.253435	0.267406	FALSE	FALSE	FALSE	0.104777	0.551911	314436	AML	TRUE	reported	0.00239551	1.2e-70	472174	TL	TRUE	reported	textfile	2	TRUE	0.000668326	315.776
rs41269079	A	T	A	T	0.0153617	0.1904	0.188991	0.24149	FALSE	TRUE	FALSE	0.11147	0.0876214	314436	AML	TRUE	reported	0.0025499	1.7e-09	472174	TL	TRUE	reported	textfile	2	TRUE	7.68594e-05	36.2936
rs41304832	A	G	A	G	0.0611702	0.239881	0.012378	0.0478303	FALSE	FALSE	FALSE	0.234256	0.30583	314436	AML	TRUE	reported	0.0093095	5e-11	472174	TL	TRUE	reported	textfile	2	TRUE	9.14293e-05	43.1743
rs429358	C	T	C	T	0.0173498	-0.070892	0.153969	0.173015	FALSE	FALSE	FALSE	0.118177	0.548586	314436	AML	TRUE	reported	0.00277091	3.8e-10	472174	TL	TRUE	reported	textfile	2	TRUE	8.30244e-05	39.2051
rs4498805	T	G	T	G	0.0150601	-0.0753141	0.546632	0.485728	FALSE	FALSE	FALSE	0.0910035	0.4079	314436	AML	TRUE	reported	0.00200376	5.7e-14	472174	TL	TRUE	reported	textfile	2	TRUE	0.000119622	56.4888
rs4530278	T	G	T	G	0.0138793	0.0576468	0.59815	0.617808	FALSE	FALSE	FALSE	0.0927981	0.534463	314436	AML	TRUE	reported	0.0020567	1.5e-11	472174	TL	TRUE	reported	textfile	2	TRUE	9.64382e-05	45.5398
rs45604339	T	C	T	C	-0.020433	0.0632543	0.34242	0.403978	FALSE	FALSE	FALSE	0.0932161	0.497406	314436	AML	TRUE	reported	0.00211433	4.3e-22	472174	TL	TRUE	reported	textfile	2	TRUE	0.000197756	93.3936
rs4695407	G	A	G	A	0.0141511	0.0883683	0.507843	0.491418	FALSE	FALSE	FALSE	0.0915026	0.334171	314436	AML	TRUE	reported	0.00199925	1.5e-12	472174	TL	TRUE	reported	textfile	2	TRUE	0.000106096	50.1008
rs4724	A	G	A	G	-0.0547446	-0.0605934	0.116598	0.10303	FALSE	FALSE	FALSE	0.146007	0.678141	314436	AML	TRUE	reported	0.00312441	9.8e-69	472174	TL	TRUE	reported	textfile	2	TRUE	0.000649774	307.004
rs4731541	G	C	G	C	-0.0206119	0.173342	0.624901	0.676149	FALSE	TRUE	FALSE	0.0949628	0.0679454	314436	AML	TRUE	reported	0.00205962	1.4e-23	472174	TL	TRUE	reported	textfile	2	TRUE	0.000212064	100.152
rs4743037	T	C	T	C	0.0147971	-0.100653	0.230874	0.201109	FALSE	FALSE	FALSE	0.110128	0.360735	314436	AML	TRUE	reported	0.00238094	5.1e-10	472174	TL	TRUE	reported	textfile	2	TRUE	8.17935e-05	38.6238
rs56799554	G	A	G	A	-0.0259793	0.186898	0.170183	0.267752	FALSE	FALSE	FALSE	0.108206	0.084124	314436	AML	TRUE	reported	0.00267858	3e-22	472174	TL	TRUE	reported	textfile	2	TRUE	0.000199185	94.0684
rs5742915	C	T	C	T	0.0193377	-0.149806	0.445829	0.371006	FALSE	FALSE	FALSE	0.0926819	0.106021	314436	AML	TRUE	reported	0.00202886	1.6e-21	472174	TL	TRUE	reported	textfile	2	TRUE	0.000192362	90.8455
rs59409453	G	A	G	A	0.0202133	0.0728849	0.730602	0.804717	FALSE	FALSE	FALSE	0.113167	0.519546	314436	AML	TRUE	reported	0.00230175	1.6e-18	472174	TL	TRUE	reported	textfile	2	TRUE	0.0001633	77.1181
rs6007020	C	T	C	T	0.0144904	-0.0325792	0.367823	0.345572	FALSE	FALSE	FALSE	0.0955917	0.733241	314436	AML	TRUE	reported	0.00209637	4.8e-12	472174	TL	TRUE	reported	textfile	2	TRUE	0.000101176	47.7775
rs6054257	A	G	A	G	-0.0141684	0.0277992	0.793522	0.806983	FALSE	FALSE	FALSE	0.114571	0.808286	314436	AML	TRUE	reported	0.00247729	1.1e-08	472174	TL	TRUE	reported	textfile	2	TRUE	6.92717e-05	32.7104
rs61748181	T	C	T	C	-0.059181	-0.35464	0.028928	0.0369736	FALSE	FALSE	FALSE	0.199092	0.0748652	314436	AML	TRUE	reported	0.00595394	2.8e-23	472174	TL	TRUE	reported	textfile	2	TRUE	0.000209201	98.7993
rs6536702	A	G	A	G	0.0534148	0.117704	0.774647	0.834957	FALSE	FALSE	FALSE	0.117709	0.317331	314436	AML	TRUE	reported	0.00238875	9.4e-111	472174	TL	TRUE	reported	textfile	2	TRUE	0.00105784	500.011
rs6584579	G	A	G	A	0.0114923	0.00299988	0.398876	0.322581	FALSE	FALSE	FALSE	0.0975788	0.975474	314436	AML	TRUE	reported	0.00204674	2e-08	472174	TL	TRUE	reported	textfile	2	TRUE	6.67663e-05	31.5273
rs6587577	G	A	G	A	-0.0182148	-0.107691	0.826346	0.82823	FALSE	FALSE	FALSE	0.124951	0.38876	314436	AML	TRUE	reported	0.0026359	4.8e-12	472174	TL	TRUE	reported	textfile	2	TRUE	0.000101122	47.7517
rs6659669	T	C	T	C	-0.0117091	-0.0318396	0.605095	0.574325	FALSE	FALSE	FALSE	0.0921579	0.729726	314436	AML	TRUE	reported	0.00205167	1.1e-08	472174	TL	TRUE	reported	textfile	2	TRUE	6.89763e-05	32.5709
rs6669563	A	G	A	G	0.0182358	0.133994	0.437768	0.504822	FALSE	FALSE	FALSE	0.0911956	0.141751	314436	AML	TRUE	reported	0.00202476	2.1e-19	472174	TL	TRUE	reported	textfile	2	TRUE	0.000171762	81.1149
rs66731853	A	G	A	G	-0.0177791	-0.081872	0.317304	0.184402	FALSE	FALSE	FALSE	0.114505	0.474602	314436	AML	TRUE	reported	0.00215421	1.5e-16	472174	TL	TRUE	reported	textfile	2	TRUE	0.000144238	68.1148
rs6751209	C	T	C	T	-0.0140465	0.00542993	0.204231	0.182401	FALSE	FALSE	FALSE	0.11846	0.96344	314436	AML	TRUE	reported	0.00248465	1.6e-08	472174	TL	TRUE	reported	textfile	2	TRUE	6.76822e-05	31.9598
rs6776756	A	G	A	G	-0.0174439	-0.0237734	0.597562	0.528705	FALSE	FALSE	FALSE	0.0917528	0.795556	314436	AML	TRUE	reported	0.00203747	1.1e-17	472174	TL	TRUE	reported	textfile	2	TRUE	0.000155216	73.2998
rs6881568	A	C	A	C	0.0169256	0.203056	0.36258	0.313918	FALSE	FALSE	FALSE	0.102045	0.0466069	314436	AML	TRUE	reported	0.00207735	3.7e-16	472174	TL	TRUE	reported	textfile	2	TRUE	0.000140574	66.3845
rs7099229	A	G	A	G	-0.0153288	-0.0779674	0.273301	0.169351	FALSE	FALSE	FALSE	0.11902	0.512416	314436	AML	TRUE	reported	0.00224403	8.4e-12	472174	TL	TRUE	reported	textfile	2	TRUE	9.8813e-05	46.6613
rs7164950	G	A	G	A	0.0129362	0.0726972	0.405979	0.4401	FALSE	FALSE	FALSE	0.0922945	0.430893	314436	AML	TRUE	reported	0.00204001	2.3e-10	472174	TL	TRUE	reported	textfile	2	TRUE	8.51549e-05	40.2112
rs7209057	A	G	A	G	0.011819	-0.128145	0.561044	0.519351	FALSE	FALSE	FALSE	0.0912523	0.16023	314436	AML	TRUE	reported	0.00202865	5.7e-09	472174	TL	TRUE	reported	textfile	2	TRUE	7.1881e-05	33.9426
rs7221585	T	C	T	C	0.0143271	0.142066	0.22401	0.31334	FALSE	FALSE	FALSE	0.100417	0.157138	314436	AML	TRUE	reported	0.00247042	6.7e-09	472174	TL	TRUE	reported	textfile	2	TRUE	7.12266e-05	33.6336
rs73581419	T	C	T	C	0.0229838	-0.136924	0.106605	0.0717454	FALSE	FALSE	FALSE	0.165699	0.408611	314436	AML	TRUE	reported	0.00324156	1.3e-12	472174	TL	TRUE	reported	textfile	2	TRUE	0.00010646	50.2729
rs75664430	G	C	G	C	-0.0235179	0.155042	0.248028	0.217719	FALSE	TRUE	FALSE	0.115159	0.178194	314436	AML	TRUE	reported	0.0023186	3.6e-24	472174	TL	TRUE	reported	textfile	2	TRUE	0.000217846	102.883
rs76065543	T	C	T	C	0.0342843	-0.192753	0.137527	0.154074	FALSE	FALSE	FALSE	0.11722	0.100102	314436	AML	TRUE	reported	0.00290708	4.2e-32	472174	TL	TRUE	reported	textfile	2	TRUE	0.000294474	139.083
rs76094497	A	G	A	G	0.0278689	-0.0957174	0.051569	0.0224526	FALSE	FALSE	FALSE	0.292946	0.743863	314436	AML	TRUE	reported	0.00461731	1.6e-09	472174	TL	TRUE	reported	textfile	2	TRUE	7.71482e-05	36.43
rs76219171	A	G	A	G	0.0359839	-0.00841396	0.058433	0.0348602	FALSE	FALSE	FALSE	0.246464	0.972766	314436	AML	TRUE	reported	0.00431741	7.8e-17	472174	TL	TRUE	reported	textfile	2	TRUE	0.000147097	69.4653
rs762679	A	T	A	T	0.0310104	0.0171424	0.856501	0.830489	FALSE	TRUE	FALSE	0.120513	0.886886	314436	AML	TRUE	reported	0.00285024	1.4e-27	472174	TL	TRUE	reported	textfile	2	TRUE	0.000250635	118.372
rs76666449	C	T	C	T	0.0295125	-0.250623	0.100625	0.106557	FALSE	FALSE	FALSE	0.132643	0.0588315	314436	AML	TRUE	reported	0.00333186	8.2e-19	472174	TL	TRUE	reported	textfile	2	TRUE	0.000166136	78.4579
rs77231040	C	G	C	G	0.0989303	0.136612	0.005742	0.028793	FALSE	TRUE	FALSE	0.289375	0.636862	314436	AML	TRUE	reported	0.0134649	2e-13	472174	TL	TRUE	reported	textfile	2	TRUE	0.000114314	53.9822
rs7726159	A	C	A	C	0.0707719	0.218221	0.327295	0.374044	FALSE	FALSE	FALSE	0.0969304	0.0243652	314436	AML	TRUE	reported	0.0021282	1e-200	472174	TL	TRUE	reported	textfile	2	TRUE	0.00233657	1105.85
rs7772289	T	G	T	G	0.017549	0.0856766	0.503081	0.635632	FALSE	FALSE	FALSE	0.093583	0.359922	314436	AML	TRUE	reported	0.00200003	1.7e-18	472174	TL	TRUE	reported	textfile	2	TRUE	0.000163027	76.9892
rs77732866	A	G	A	G	0.0177942	0.120204	0.137597	0.155738	FALSE	FALSE	FALSE	0.130399	0.356625	314436	AML	TRUE	reported	0.00290595	9.2e-10	472174	TL	TRUE	reported	textfile	2	TRUE	7.94043e-05	37.4955
rs7790856	T	C	T	C	-0.0437199	0.0548598	0.289139	0.23666	FALSE	FALSE	FALSE	0.108562	0.613325	314436	AML	TRUE	reported	0.00220526	1.8e-87	472174	TL	TRUE	reported	textfile	2	TRUE	0.000831716	393.04
rs78491606	C	A	C	A	-0.0756311	0.259024	0.018433	0.0356397	FALSE	FALSE	FALSE	0.274789	0.345869	314436	AML	TRUE	reported	0.00741168	1.9e-24	472174	TL	TRUE	reported	textfile	2	TRUE	0.00022048	104.128
rs79977579	A	C	A	C	0.0281517	-0.160761	0.09555	0.081919	FALSE	FALSE	FALSE	0.155419	0.300962	314436	AML	TRUE	reported	0.00343182	2.3e-16	472174	TL	TRUE	reported	textfile	2	TRUE	0.000142494	67.2912
rs80116508	A	G	A	G	-0.0352672	-0.0533269	0.062356	0.0738348	FALSE	FALSE	FALSE	0.170057	0.753838	314436	AML	TRUE	reported	0.00415151	2e-17	472174	TL	TRUE	reported	textfile	2	TRUE	0.000152813	72.1652
rs80324517	A	G	A	G	0.0396515	-0.0366924	0.048259	0.0596111	FALSE	FALSE	FALSE	0.188679	0.845807	314436	AML	TRUE	reported	0.00466286	1.8e-17	472174	TL	TRUE	reported	textfile	2	TRUE	0.000153125	72.3124
rs8102497	A	G	A	G	-0.0149654	-0.0035636	0.431828	0.446697	FALSE	FALSE	FALSE	0.0914059	0.968901	314436	AML	TRUE	reported	0.0020233	1.4e-13	472174	TL	TRUE	reported	textfile	2	TRUE	0.000115852	54.7084
rs8105767	G	A	G	A	0.0328384	0.169063	0.29467	0.350386	FALSE	FALSE	FALSE	0.0979346	0.0842966	314436	AML	TRUE	reported	0.00220117	2.5e-50	472174	TL	TRUE	reported	textfile	2	TRUE	0.00047114	222.564
rs869785	C	T	C	T	-0.0147303	-0.010599	0.672471	0.659491	FALSE	FALSE	FALSE	0.0962126	0.912281	314436	AML	TRUE	reported	0.00212801	4.4e-12	472174	TL	TRUE	reported	textfile	2	TRUE	0.000101468	47.9153
rs871134	T	C	T	C	-0.0182986	-0.113396	0.569032	0.530215	FALSE	FALSE	FALSE	0.0914541	0.215004	314436	AML	TRUE	reported	0.0020263	1.7e-19	472174	TL	TRUE	reported	textfile	2	TRUE	0.000172684	81.5505
rs932002	T	C	T	C	-0.0402052	-0.0415779	0.150843	0.229484	FALSE	FALSE	FALSE	0.106774	0.696979	314436	AML	TRUE	reported	0.00279667	7.3e-47	472174	TL	TRUE	reported	textfile	2	TRUE	0.000437512	206.671
rs9398196	G	A	G	A	-0.0143586	-0.0906628	0.52005	0.606461	FALSE	FALSE	FALSE	0.0943958	0.336827	314436	AML	TRUE	reported	0.00201175	9.5e-13	472174	TL	TRUE	reported	textfile	2	TRUE	0.000107877	50.9418
rs939916	A	G	A	G	0.0241795	0.164454	0.669967	0.76641	FALSE	FALSE	FALSE	0.102269	0.107821	314436	AML	TRUE	reported	0.00216724	6.6e-29	472174	TL	TRUE	reported	textfile	2	TRUE	0.000263551	124.474
rs9419958	C	T	C	T	-0.0810098	-0.18268	0.86139	0.868828	FALSE	FALSE	FALSE	0.144101	0.204897	314436	AML	TRUE	reported	0.00293847	2.6e-167	472174	TL	TRUE	reported	textfile	2	TRUE	0.00160706	760.03
rs9600019	T	C	T	C	0.0127134	0.135586	0.335579	0.406429	FALSE	FALSE	FALSE	0.0940985	0.149616	314436	AML	TRUE	reported	0.00213096	2.4e-09	472174	TL	TRUE	reported	textfile	2	TRUE	7.53769e-05	35.5935
rs9878436	T	C	T	C	-0.0143407	-0.0479638	0.434393	0.340204	FALSE	FALSE	FALSE	0.0948716	0.613162	314436	AML	TRUE	reported	0.00201819	1.2e-12	472174	TL	TRUE	reported	textfile	2	TRUE	0.000106922	50.4911
rs9955360	A	C	A	C	-0.0190311	-0.096125	0.869288	0.844624	FALSE	FALSE	FALSE	0.130108	0.460023	314436	AML	TRUE	reported	0.00299791	2.2e-10	472174	TL	TRUE	reported	textfile	2	TRUE	8.53398e-05	40.2985

## Sheet: chronic lymphocytic leukemia
SNP	effect_allele.exposure	other_allele.exposure	effect_allele.outcome	other_allele.outcome	beta.exposure	beta.outcome	eaf.exposure	eaf.outcome	remove	palindromic	ambiguous	se.outcome	pval.outcome	samplesize.outcome	outcome	mr_keep.outcome	pval_origin.outcome	se.exposure	pval.exposure	samplesize.exposure	exposure	mr_keep.exposure	pval_origin.exposure	data_source.exposure	action	mr_keep	R2	F
rs1003322	A	C	A	C	0.0141734	-0.00482228	0.213742	0.141769	FALSE	FALSE	FALSE	0.079261	0.951486	314857	CLL	TRUE	reported	0.00247546	1e-08	472174	TL	TRUE	reported	textfile	2	TRUE	6.94231e-05	32.7819
rs10112752	A	G	A	G	-0.0287522	-0.0291627	0.430369	0.437651	FALSE	FALSE	FALSE	0.0557516	0.600916	314857	CLL	TRUE	reported	0.00202518	9.5e-46	472174	TL	TRUE	reported	textfile	2	TRUE	0.000426705	201.564
rs1023767	A	G	A	G	-0.0183732	-0.0178859	0.237595	0.368707	FALSE	FALSE	FALSE	0.0572859	0.754873	314857	CLL	TRUE	reported	0.00234772	5e-15	472174	TL	TRUE	reported	textfile	2	TRUE	0.000129694	61.2456
rs10768683	G	C	G	C	0.0469922	-0.139372	0.841033	0.775056	FALSE	TRUE	FALSE	0.0690519	0.0435532	314857	CLL	TRUE	reported	0.00277015	1.5e-64	472174	TL	TRUE	reported	textfile	2	TRUE	0.000609086	287.768
rs10773176	G	A	G	A	-0.0172009	-0.0912569	0.741214	0.795045	FALSE	FALSE	FALSE	0.0705191	0.19564	314857	CLL	TRUE	reported	0.00228534	5.2e-14	472174	TL	TRUE	reported	textfile	2	TRUE	0.000119963	56.6499
rs10774624	A	G	A	G	0.0149944	-0.0654931	0.53276	0.580463	FALSE	FALSE	FALSE	0.056694	0.248008	314857	CLL	TRUE	reported	0.00205494	2.9e-13	472174	TL	TRUE	reported	textfile	2	TRUE	0.000112748	53.2425
rs10805346	C	T	C	T	0.0117072	0.0685607	0.439339	0.470336	FALSE	FALSE	FALSE	0.0559825	0.220695	314857	CLL	TRUE	reported	0.00202147	7e-09	472174	TL	TRUE	reported	textfile	2	TRUE	7.10295e-05	33.5405
rs10840270	G	C	G	C	0.014383	-0.00425157	0.655684	0.6646	FALSE	TRUE	FALSE	0.0589564	0.942511	314857	CLL	TRUE	reported	0.00212494	1.3e-11	472174	TL	TRUE	reported	textfile	2	TRUE	9.702e-05	45.8146
rs10845387	A	G	A	G	-0.0141214	-0.0786881	0.352666	0.327422	FALSE	FALSE	FALSE	0.0593623	0.184986	314857	CLL	TRUE	reported	0.00209396	1.5e-11	472174	TL	TRUE	reported	textfile	2	TRUE	9.63108e-05	45.4796
rs10905255	T	G	T	G	-0.0182493	-0.0358041	0.57919	0.551218	FALSE	FALSE	FALSE	0.0559791	0.522433	314857	CLL	TRUE	reported	0.00203099	2.6e-19	472174	TL	TRUE	reported	textfile	2	TRUE	0.000170962	80.7374
rs10936598	C	A	C	A	-0.0656433	-0.169458	0.32379	0.312091	FALSE	FALSE	FALSE	0.0580858	0.00352996	314857	CLL	TRUE	reported	0.00214663	1e-200	472174	TL	TRUE	reported	textfile	2	TRUE	0.00197654	935.114
rs11085072	T	C	T	C	-0.0131806	-0.0801079	0.236909	0.155882	FALSE	FALSE	FALSE	0.0744648	0.282025	314857	CLL	TRUE	reported	0.00236713	2.6e-08	472174	TL	TRUE	reported	textfile	2	TRUE	6.56592e-05	31.0045
rs11117354	C	T	C	T	0.0232506	-0.0178566	0.696513	0.577246	FALSE	FALSE	FALSE	0.0562357	0.750841	314857	CLL	TRUE	reported	0.00219601	3.4e-26	472174	TL	TRUE	reported	textfile	2	TRUE	0.000237353	112.098
rs111527438	C	T	C	T	0.0125	-0.0197881	0.351251	0.319438	FALSE	FALSE	FALSE	0.0592643	0.738458	314857	CLL	TRUE	reported	0.00211016	3.1e-09	472174	TL	TRUE	reported	textfile	2	TRUE	7.43113e-05	35.0903
rs111950327	C	G	C	G	0.0238271	0.119905	0.063628	0.0591317	FALSE	TRUE	FALSE	0.123305	0.330838	314857	CLL	TRUE	reported	0.00409406	5.9e-09	472174	TL	TRUE	reported	textfile	2	TRUE	7.173e-05	33.8713
rs112394943	C	T	C	T	-0.0198961	0.0398796	0.162741	0.239894	FALSE	FALSE	FALSE	0.0668291	0.550681	314857	CLL	TRUE	reported	0.00281641	1.6e-12	472174	TL	TRUE	reported	textfile	2	TRUE	0.000105681	49.9048
rs113525195	A	C	A	C	-0.0124075	-0.0202561	0.290254	0.297625	FALSE	FALSE	FALSE	0.0604642	0.737617	314857	CLL	TRUE	reported	0.00224132	3.1e-08	472174	TL	TRUE	reported	textfile	2	TRUE	6.48979e-05	30.645
rs11557154	T	C	T	C	-0.0343719	-0.0364276	0.13003	0.125056	FALSE	FALSE	FALSE	0.0825564	0.659036	314857	CLL	TRUE	reported	0.00298538	1.1e-30	472174	TL	TRUE	reported	textfile	2	TRUE	0.000280662	132.558
rs11579626	C	A	C	A	0.0265113	0.0422255	0.084882	0.124034	FALSE	FALSE	FALSE	0.085539	0.62156	314857	CLL	TRUE	reported	0.00357752	1.3e-13	472174	TL	TRUE	reported	textfile	2	TRUE	0.000116291	54.9156
rs11584821	T	C	T	C	-0.0306517	-0.0215655	0.176208	0.176512	FALSE	FALSE	FALSE	0.0721983	0.76517	314857	CLL	TRUE	reported	0.00263623	3e-31	472174	TL	TRUE	reported	textfile	2	TRUE	0.000286231	135.189
rs116863223	A	G	A	G	-0.0817874	-0.0812789	0.011763	0.0149701	FALSE	FALSE	FALSE	0.217518	0.708654	314857	CLL	TRUE	reported	0.00937157	2.6e-18	472174	TL	TRUE	reported	textfile	2	TRUE	0.000161278	76.1634
rs11699829	A	G	A	G	0.0641957	0.557579	0.034146	0.0257661	FALSE	FALSE	FALSE	0.190699	0.00345708	314857	CLL	TRUE	reported	0.00602028	1.5e-26	472174	TL	TRUE	reported	textfile	2	TRUE	0.000240753	113.704
rs117034449	A	G	A	G	0.0374377	0.0987458	0.023304	0.0191852	FALSE	FALSE	FALSE	0.212657	0.642402	314857	CLL	TRUE	reported	0.00667898	2.1e-08	472174	TL	TRUE	reported	textfile	2	TRUE	6.65376e-05	31.4193
rs117407747	T	C	T	C	0.0450533	0.115662	0.027571	0.0126952	FALSE	FALSE	FALSE	0.264886	0.662366	314857	CLL	TRUE	reported	0.00611706	1.8e-13	472174	TL	TRUE	reported	textfile	2	TRUE	0.000114872	54.2458
rs11746381	C	T	C	T	0.0329955	-0.0718933	0.0568	0.0659064	FALSE	FALSE	FALSE	0.107843	0.504998	314857	CLL	TRUE	reported	0.00431036	1.9e-14	472174	TL	TRUE	reported	textfile	2	TRUE	0.000124087	58.5977
rs117512405	A	G	A	G	-0.0790134	0.0645629	0.017043	0.0555389	FALSE	FALSE	FALSE	0.126085	0.60861	314857	CLL	TRUE	reported	0.00824611	9.5e-22	472174	TL	TRUE	reported	textfile	2	TRUE	0.000194409	91.8124
rs117630647	A	G	A	G	0.059565	0.329894	0.021346	0.021689	FALSE	FALSE	FALSE	0.21794	0.130104	314857	CLL	TRUE	reported	0.00720413	1.4e-16	472174	TL	TRUE	reported	textfile	2	TRUE	0.000144762	68.3624
rs11769630	A	T	A	T	-0.0256807	-0.0791805	0.072227	0.0964483	FALSE	TRUE	FALSE	0.0912651	0.38562	314857	CLL	TRUE	reported	0.00389475	4.3e-11	472174	TL	TRUE	reported	textfile	2	TRUE	9.20688e-05	43.4763
rs11991877	A	T	A	T	-0.030138	-0.0655047	0.889309	0.853293	FALSE	TRUE	FALSE	0.0800161	0.412989	314857	CLL	TRUE	reported	0.00318686	3.2e-21	472174	TL	TRUE	reported	textfile	2	TRUE	0.000189373	89.4337
rs12369950	C	T	C	T	-0.0178308	-0.136213	0.140675	0.129532	FALSE	FALSE	FALSE	0.0788033	0.0838958	314857	CLL	TRUE	reported	0.00290205	8e-10	472174	TL	TRUE	reported	textfile	2	TRUE	7.99457e-05	37.7511
rs12412214	A	G	A	G	-0.0245174	-0.00562048	0.279765	0.388039	FALSE	FALSE	FALSE	0.0566863	0.921019	314857	CLL	TRUE	reported	0.00222685	3.4e-28	472174	TL	TRUE	reported	textfile	2	TRUE	0.000256657	121.217
rs12451892	C	T	C	T	-0.0116145	0.0101917	0.380511	0.425349	FALSE	FALSE	FALSE	0.0560904	0.855818	314857	CLL	TRUE	reported	0.00207578	2.2e-08	472174	TL	TRUE	reported	textfile	2	TRUE	6.62991e-05	31.3066
rs1291143	C	A	C	A	0.0493145	-0.0170696	0.849026	0.777724	FALSE	FALSE	FALSE	0.0672302	0.799575	314857	CLL	TRUE	reported	0.0027991	1.8e-69	472174	TL	TRUE	reported	textfile	2	TRUE	0.000656939	310.392
rs12925933	C	A	C	A	-0.0146622	0.00512528	0.66221	0.551239	FALSE	FALSE	FALSE	0.0558501	0.926882	314857	CLL	TRUE	reported	0.00213796	7e-12	472174	TL	TRUE	reported	textfile	2	TRUE	9.95987e-05	47.0324
rs12932179	G	A	G	A	-0.0136257	0.0312397	0.561399	0.621031	FALSE	FALSE	FALSE	0.0566114	0.581067	314857	CLL	TRUE	reported	0.0020276	1.8e-11	472174	TL	TRUE	reported	textfile	2	TRUE	9.56334e-05	45.1597
rs13062095	C	T	C	T	0.0138552	0.0857788	0.327843	0.392403	FALSE	FALSE	FALSE	0.0574064	0.135114	314857	CLL	TRUE	reported	0.00214113	9.7e-11	472174	TL	TRUE	reported	textfile	2	TRUE	8.86745e-05	41.8733
rs131797	T	TAAAAA	T	TAAAAA	0.0243752	0.0868607	0.235625	0.200179	FALSE	FALSE	FALSE	0.0708717	0.220347	314857	CLL	TRUE	reported	0.00236561	6.8e-25	472174	TL	TRUE	reported	textfile	2	TRUE	0.000224807	106.172
rs13230646	C	T	C	T	-0.0173277	-0.0759799	0.248945	0.169807	FALSE	FALSE	FALSE	0.0718895	0.290558	314857	CLL	TRUE	reported	0.00232377	8.9e-14	472174	TL	TRUE	reported	textfile	2	TRUE	0.000117745	55.6024
rs1332941	G	A	G	A	0.0256552	0.020164	0.820466	0.800834	FALSE	FALSE	FALSE	0.0687658	0.769348	314857	CLL	TRUE	reported	0.00273159	5.9e-21	472174	TL	TRUE	reported	textfile	2	TRUE	0.000186783	88.21
rs137901416	A	G	A	G	0.04572	-0.103217	0.100311	0.0606287	FALSE	FALSE	FALSE	0.111411	0.354213	314857	CLL	TRUE	reported	0.00332355	4.7e-43	472174	TL	TRUE	reported	textfile	2	TRUE	0.000400619	189.237
rs139669835	T	C	T	C	-0.0612563	0.626991	0.009365	0.00204884	FALSE	FALSE	FALSE	0.788804	0.426693	314857	CLL	TRUE	reported	0.0105346	6.1e-09	472174	TL	TRUE	reported	textfile	2	TRUE	7.16032e-05	33.8114
rs139795227	C	A	C	A	0.0599379	-0.0207441	0.014021	0.0253317	FALSE	FALSE	FALSE	0.175323	0.905815	314857	CLL	TRUE	reported	0.00873247	6.7e-12	472174	TL	TRUE	reported	textfile	2	TRUE	9.97662e-05	47.1115
rs141214782	TTATC	T	TTATC	T	-0.0246687	-0.0116451	0.101206	0.107773	FALSE	FALSE	FALSE	0.0889001	0.895782	314857	CLL	TRUE	reported	0.00335723	2e-13	472174	TL	TRUE	reported	textfile	2	TRUE	0.000114335	53.9919
rs142426306	T	C	T	C	-0.0504903	-0.0840632	0.039544	0.0405102	FALSE	FALSE	FALSE	0.137326	0.540443	314857	CLL	TRUE	reported	0.00539933	8.7e-21	472174	TL	TRUE	reported	textfile	2	TRUE	0.000185163	87.4449
rs143190905	T	G	T	G	-0.0723995	-0.076638	0.080404	0.0698221	FALSE	FALSE	FALSE	0.105046	0.465655	314857	CLL	TRUE	reported	0.00369421	1.6e-85	472174	TL	TRUE	reported	textfile	2	TRUE	0.00081278	384.084
rs144204502	T	C	T	C	-0.100574	0.032695	0.012562	0.0381825	FALSE	FALSE	FALSE	0.14655	0.823459	314857	CLL	TRUE	reported	0.00913369	3.4e-28	472174	TL	TRUE	reported	textfile	2	TRUE	0.000256723	121.249
rs145114957	G	C	G	C	0.0272605	-0.0136333	0.042648	0.0396707	FALSE	TRUE	FALSE	0.140084	0.92247	314857	CLL	TRUE	reported	0.00498872	4.6e-08	472174	TL	TRUE	reported	textfile	2	TRUE	6.32353e-05	29.8598
rs150150565	T	C	T	C	0.063762	-0.150613	0.021455	0.0157098	FALSE	FALSE	FALSE	0.205982	0.464661	314857	CLL	TRUE	reported	0.00739877	6.8e-18	472174	TL	TRUE	reported	textfile	2	TRUE	0.000157266	74.2682
rs16978028	T	A	T	A	-0.029945	0.0755923	0.143727	0.0907567	FALSE	TRUE	FALSE	0.0994878	0.447365	314857	CLL	TRUE	reported	0.00285068	8.2e-26	472174	TL	TRUE	reported	textfile	2	TRUE	0.000233641	110.344
rs17445108	A	G	A	G	-0.0168922	-0.137166	0.12695	0.114216	FALSE	FALSE	FALSE	0.0836276	0.100965	314857	CLL	TRUE	reported	0.00300983	2e-08	472174	TL	TRUE	reported	textfile	2	TRUE	6.67049e-05	31.4983
rs17677991	G	C	G	C	0.0222664	-0.0190747	0.342123	0.388899	FALSE	TRUE	FALSE	0.0566703	0.736426	314857	CLL	TRUE	reported	0.00210806	4.4e-26	472174	TL	TRUE	reported	textfile	2	TRUE	0.000236227	111.566
rs182059586	C	T	C	T	-0.0571159	-0.0138797	0.02511	0.00673653	FALSE	FALSE	FALSE	0.337039	0.967151	314857	CLL	TRUE	reported	0.00680853	4.9e-17	472174	TL	TRUE	reported	textfile	2	TRUE	0.000149019	70.3729
rs185174247	A	G	A	G	0.0372806	0.100481	0.05609	0.0351708	FALSE	FALSE	FALSE	0.157362	0.523124	314857	CLL	TRUE	reported	0.00435145	1.1e-17	472174	TL	TRUE	reported	textfile	2	TRUE	0.000155428	73.4
rs188918174	T	C	T	C	0.0403062	0.220234	0.036106	0.0575349	FALSE	FALSE	FALSE	0.130177	0.0906839	314857	CLL	TRUE	reported	0.00543604	1.2e-13	472174	TL	TRUE	reported	textfile	2	TRUE	0.00011642	54.9764
rs1907702	A	G	A	G	0.0150247	-0.0432554	0.766771	0.799395	FALSE	FALSE	FALSE	0.069934	0.536235	314857	CLL	TRUE	reported	0.00242651	5.9e-10	472174	TL	TRUE	reported	textfile	2	TRUE	8.11914e-05	38.3394
rs1957937	T	A	T	A	0.0209365	0.0294074	0.16018	0.19157	FALSE	TRUE	FALSE	0.0705564	0.676829	314857	CLL	TRUE	reported	0.00273361	1.9e-14	472174	TL	TRUE	reported	textfile	2	TRUE	0.000124216	58.6588
rs1985369	G	A	G	A	-0.0311893	-0.0692838	0.868178	0.884466	FALSE	FALSE	FALSE	0.0893392	0.438036	314857	CLL	TRUE	reported	0.00300952	3.6e-25	472174	TL	TRUE	reported	textfile	2	TRUE	0.000227413	107.403
rs201009932	T	TA	T	TA	0.0769296	0.318277	0.991068	0.984176	FALSE	FALSE	FALSE	0.18994	0.0938037	314857	CLL	TRUE	reported	0.0116209	3.6e-11	472174	TL	TRUE	reported	textfile	2	TRUE	9.28036e-05	43.8234
rs2056726	A	G	A	G	-0.0228078	0.0973915	0.214376	0.247983	FALSE	FALSE	FALSE	0.0658532	0.139162	314857	CLL	TRUE	reported	0.00243638	7.9e-21	472174	TL	TRUE	reported	textfile	2	TRUE	0.000185564	87.6345
rs2230590	C	T	C	T	-0.0158022	-0.0627821	0.510897	0.383234	FALSE	FALSE	FALSE	0.0565257	0.266705	314857	CLL	TRUE	reported	0.00200806	3.6e-15	472174	TL	TRUE	reported	textfile	2	TRUE	0.000131136	61.927
rs2282764	G	A	G	A	-0.0224234	-0.122215	0.142384	0.128995	FALSE	FALSE	FALSE	0.079134	0.12249	314857	CLL	TRUE	reported	0.00289392	9.3e-15	472174	TL	TRUE	reported	textfile	2	TRUE	0.000127137	60.0383
rs2293579	A	G	A	G	-0.012915	-0.0588755	0.386274	0.288913	FALSE	FALSE	FALSE	0.060026	0.326675	314857	CLL	TRUE	reported	0.00205481	3.3e-10	472174	TL	TRUE	reported	textfile	2	TRUE	8.36579e-05	39.5042
rs2538745	C	T	C	T	-0.012942	-0.0428198	0.602841	0.517993	FALSE	FALSE	FALSE	0.0554923	0.440331	314857	CLL	TRUE	reported	0.002056	3.1e-10	472174	TL	TRUE	reported	textfile	2	TRUE	8.39108e-05	39.6237
rs2555104	C	A	C	A	-0.0139717	-0.00105184	0.434255	0.48132	FALSE	FALSE	FALSE	0.055187	0.984794	314857	CLL	TRUE	reported	0.00203498	6.6e-12	472174	TL	TRUE	reported	textfile	2	TRUE	9.98235e-05	47.1386
rs2763979	T	C	T	C	-0.0277713	-0.0152483	0.359721	0.428892	FALSE	FALSE	FALSE	0.0557021	0.78428	314857	CLL	TRUE	reported	0.00208092	1.3e-40	472174	TL	TRUE	reported	textfile	2	TRUE	0.000377065	178.107
rs28502153	A	C	A	C	-0.0215916	0.0976066	0.377958	0.397523	FALSE	FALSE	FALSE	0.0572883	0.0884219	314857	CLL	TRUE	reported	0.00206208	1.2e-25	472174	TL	TRUE	reported	textfile	2	TRUE	0.000232143	109.637
rs28577594	C	G	C	G	0.0187657	0.0710231	0.709829	0.720444	FALSE	TRUE	FALSE	0.0612365	0.246123	314857	CLL	TRUE	reported	0.00224024	5.4e-17	472174	TL	TRUE	reported	textfile	2	TRUE	0.000148585	70.1679
rs2967355	C	A	C	A	-0.0461595	-0.0983089	0.774276	0.807635	FALSE	FALSE	FALSE	0.0722592	0.173671	314857	CLL	TRUE	reported	0.00238972	4e-83	472174	TL	TRUE	reported	textfile	2	TRUE	0.000789556	373.101
rs2977608	C	A	C	A	0.0129483	0.0668742	0.743949	0.706367	FALSE	FALSE	FALSE	0.0602181	0.26677	314857	CLL	TRUE	reported	0.00233716	3e-08	472174	TL	TRUE	reported	textfile	2	TRUE	6.50007e-05	30.6935
rs3093888	A	G	A	G	-0.028973	-0.131547	0.05131	0.0768316	FALSE	FALSE	FALSE	0.0981948	0.180356	314857	CLL	TRUE	reported	0.00452459	1.5e-10	472174	TL	TRUE	reported	textfile	2	TRUE	8.68338e-05	41.004
rs35640778	A	G	A	G	-0.209011	-0.309076	0.020757	0.00872079	FALSE	FALSE	FALSE	0.251461	0.219025	314857	CLL	TRUE	reported	0.00702087	9.59e-195	472174	TL	TRUE	reported	textfile	2	TRUE	0.00187344	886.247
rs3767952	A	G	A	G	0.0134472	0.0448763	0.226709	0.23053	FALSE	FALSE	FALSE	0.0661998	0.49784	314857	CLL	TRUE	reported	0.00238826	1.8e-08	472174	TL	TRUE	reported	textfile	2	TRUE	6.71381e-05	31.7029
rs3785074	G	A	G	A	0.023863	0.134191	0.289672	0.233533	FALSE	FALSE	FALSE	0.0680242	0.04853	314857	CLL	TRUE	reported	0.00220455	2.6e-27	472174	TL	TRUE	reported	textfile	2	TRUE	0.000248085	117.168
rs3891167	G	A	G	A	-0.0425685	0.0296358	0.253435	0.263317	FALSE	FALSE	FALSE	0.0639039	0.642824	314857	CLL	TRUE	reported	0.00239551	1.2e-70	472174	TL	TRUE	reported	textfile	2	TRUE	0.000668326	315.776
rs41269079	A	T	A	T	0.0153617	0.0193891	0.188991	0.20804	FALSE	TRUE	FALSE	0.0682423	0.776317	314857	CLL	TRUE	reported	0.0025499	1.7e-09	472174	TL	TRUE	reported	textfile	2	TRUE	7.68594e-05	36.2936
rs41304832	A	G	A	G	0.0611702	-0.170287	0.012378	0.0298932	FALSE	FALSE	FALSE	0.149569	0.254903	314857	CLL	TRUE	reported	0.0093095	5e-11	472174	TL	TRUE	reported	textfile	2	TRUE	9.14293e-05	43.1743
rs429358	C	T	C	T	0.0173498	0.000771425	0.153969	0.175241	FALSE	FALSE	FALSE	0.0730387	0.991573	314857	CLL	TRUE	reported	0.00277091	3.8e-10	472174	TL	TRUE	reported	textfile	2	TRUE	8.30244e-05	39.2051
rs4498805	T	G	T	G	0.0150601	0.0615987	0.546632	0.522417	FALSE	FALSE	FALSE	0.0551451	0.263982	314857	CLL	TRUE	reported	0.00200376	5.7e-14	472174	TL	TRUE	reported	textfile	2	TRUE	0.000119622	56.4888
rs4530278	T	G	T	G	0.0138793	0.0389108	0.59815	0.615319	FALSE	FALSE	FALSE	0.0564116	0.490342	314857	CLL	TRUE	reported	0.0020567	1.5e-11	472174	TL	TRUE	reported	textfile	2	TRUE	9.64382e-05	45.5398
rs45604339	T	C	T	C	-0.020433	-0.0920082	0.34242	0.362217	FALSE	FALSE	FALSE	0.0569287	0.106051	314857	CLL	TRUE	reported	0.00211433	4.3e-22	472174	TL	TRUE	reported	textfile	2	TRUE	0.000197756	93.3936
rs4695407	G	A	G	A	0.0141511	0.0646998	0.507843	0.483201	FALSE	FALSE	FALSE	0.055636	0.244865	314857	CLL	TRUE	reported	0.00199925	1.5e-12	472174	TL	TRUE	reported	textfile	2	TRUE	0.000106096	50.1008
rs4724	A	G	A	G	-0.0547446	0.0062653	0.116598	0.108421	FALSE	FALSE	FALSE	0.089273	0.944049	314857	CLL	TRUE	reported	0.00312441	9.8e-69	472174	TL	TRUE	reported	textfile	2	TRUE	0.000649774	307.004
rs4731541	G	C	G	C	-0.0206119	0.0181955	0.624901	0.644942	FALSE	TRUE	FALSE	0.0577882	0.752863	314857	CLL	TRUE	reported	0.00205962	1.4e-23	472174	TL	TRUE	reported	textfile	2	TRUE	0.000212064	100.152
rs4743037	T	C	T	C	0.0147971	0.0398218	0.230874	0.227166	FALSE	FALSE	FALSE	0.0667237	0.55063	314857	CLL	TRUE	reported	0.00238094	5.1e-10	472174	TL	TRUE	reported	textfile	2	TRUE	8.17935e-05	38.6238
rs55747751	A	G	A	G	-0.0211612	-0.118969	0.077375	0.051905	FALSE	FALSE	FALSE	0.118386	0.314934	314857	CLL	TRUE	reported	0.00375164	1.7e-08	472174	TL	TRUE	reported	textfile	2	TRUE	6.73763e-05	31.8153
rs56799554	G	A	G	A	-0.0259793	0.0124016	0.170183	0.232444	FALSE	FALSE	FALSE	0.0665613	0.852195	314857	CLL	TRUE	reported	0.00267858	3e-22	472174	TL	TRUE	reported	textfile	2	TRUE	0.000199185	94.0684
rs5742915	C	T	C	T	0.0193377	0.0336321	0.445829	0.419942	FALSE	FALSE	FALSE	0.0560943	0.548797	314857	CLL	TRUE	reported	0.00202886	1.6e-21	472174	TL	TRUE	reported	textfile	2	TRUE	0.000192362	90.8455
rs59409453	G	A	G	A	0.0202133	-0.0284655	0.730602	0.789292	FALSE	FALSE	FALSE	0.0688157	0.679132	314857	CLL	TRUE	reported	0.00230175	1.6e-18	472174	TL	TRUE	reported	textfile	2	TRUE	0.0001633	77.1181
rs6007020	C	T	C	T	0.0144904	0.0471248	0.367823	0.36576	FALSE	FALSE	FALSE	0.0578892	0.415616	314857	CLL	TRUE	reported	0.00209637	4.8e-12	472174	TL	TRUE	reported	textfile	2	TRUE	0.000101176	47.7775
rs6054257	A	G	A	G	-0.0141684	0.064396	0.793522	0.817051	FALSE	FALSE	FALSE	0.0703808	0.36021	314857	CLL	TRUE	reported	0.00247729	1.1e-08	472174	TL	TRUE	reported	textfile	2	TRUE	6.92717e-05	32.7104
rs611646	A	T	A	T	-0.0368309	-0.0513164	0.408685	0.382291	FALSE	TRUE	FALSE	0.0564885	0.363646	314857	CLL	TRUE	reported	0.00203547	3.5e-73	472174	TL	TRUE	reported	textfile	2	TRUE	0.000692934	327.411
rs61748181	T	C	T	C	-0.059181	-0.217801	0.028928	0.0430492	FALSE	FALSE	FALSE	0.122878	0.0763133	314857	CLL	TRUE	reported	0.00595394	2.8e-23	472174	TL	TRUE	reported	textfile	2	TRUE	0.000209201	98.7993
rs6536702	A	G	A	G	0.0534148	0.0514108	0.774647	0.823353	FALSE	FALSE	FALSE	0.0711691	0.470064	314857	CLL	TRUE	reported	0.00238875	9.4e-111	472174	TL	TRUE	reported	textfile	2	TRUE	0.00105784	500.011
rs6584579	G	A	G	A	0.0114923	-0.0894654	0.398876	0.309349	FALSE	FALSE	FALSE	0.0590751	0.129916	314857	CLL	TRUE	reported	0.00204674	2e-08	472174	TL	TRUE	reported	textfile	2	TRUE	6.67663e-05	31.5273
rs6587577	G	A	G	A	-0.0182148	0.0664889	0.826346	0.849519	FALSE	FALSE	FALSE	0.0754179	0.377989	314857	CLL	TRUE	reported	0.0026359	4.8e-12	472174	TL	TRUE	reported	textfile	2	TRUE	0.000101122	47.7517
rs6659669	T	C	T	C	-0.0117091	0.0978331	0.605095	0.612252	FALSE	FALSE	FALSE	0.0560639	0.0809804	314857	CLL	TRUE	reported	0.00205167	1.1e-08	472174	TL	TRUE	reported	textfile	2	TRUE	6.89763e-05	32.5709
rs6669563	A	G	A	G	0.0182358	0.0083568	0.437768	0.469485	FALSE	FALSE	FALSE	0.0553029	0.879889	314857	CLL	TRUE	reported	0.00202476	2.1e-19	472174	TL	TRUE	reported	textfile	2	TRUE	0.000171762	81.1149
rs66731853	A	G	A	G	-0.0177791	0.0882338	0.317304	0.208853	FALSE	FALSE	FALSE	0.0697759	0.20604	314857	CLL	TRUE	reported	0.00215421	1.5e-16	472174	TL	TRUE	reported	textfile	2	TRUE	0.000144238	68.1148
rs6751209	C	T	C	T	-0.0140465	0.0252426	0.204231	0.181458	FALSE	FALSE	FALSE	0.0726484	0.728244	314857	CLL	TRUE	reported	0.00248465	1.6e-08	472174	TL	TRUE	reported	textfile	2	TRUE	6.76822e-05	31.9598
rs6776756	A	G	A	G	-0.0174439	0.0311172	0.597562	0.543748	FALSE	FALSE	FALSE	0.0561396	0.579386	314857	CLL	TRUE	reported	0.00203747	1.1e-17	472174	TL	TRUE	reported	textfile	2	TRUE	0.000155216	73.2998
rs6881568	A	C	A	C	0.0169256	-0.0396964	0.36258	0.266766	FALSE	FALSE	FALSE	0.0618987	0.52132	314857	CLL	TRUE	reported	0.00207735	3.7e-16	472174	TL	TRUE	reported	textfile	2	TRUE	0.000140574	66.3845
rs7099229	A	G	A	G	-0.0153288	-0.0156236	0.273301	0.179013	FALSE	FALSE	FALSE	0.0723554	0.829043	314857	CLL	TRUE	reported	0.00224403	8.4e-12	472174	TL	TRUE	reported	textfile	2	TRUE	9.8813e-05	46.6613
rs7164950	G	A	G	A	0.0129362	-0.0816515	0.405979	0.400244	FALSE	FALSE	FALSE	0.0563119	0.147063	314857	CLL	TRUE	reported	0.00204001	2.3e-10	472174	TL	TRUE	reported	textfile	2	TRUE	8.51549e-05	40.2112
rs7209057	A	G	A	G	0.011819	-0.0837396	0.561044	0.527489	FALSE	FALSE	FALSE	0.0552581	0.129664	314857	CLL	TRUE	reported	0.00202865	5.7e-09	472174	TL	TRUE	reported	textfile	2	TRUE	7.1881e-05	33.9426
rs7221585	T	C	T	C	0.0143271	-0.0401004	0.22401	0.276189	FALSE	FALSE	FALSE	0.0612318	0.512536	314857	CLL	TRUE	reported	0.00247042	6.7e-09	472174	TL	TRUE	reported	textfile	2	TRUE	7.12266e-05	33.6336
rs73581419	T	C	T	C	0.0229838	-0.080026	0.106605	0.0774774	FALSE	FALSE	FALSE	0.100356	0.425206	314857	CLL	TRUE	reported	0.00324156	1.3e-12	472174	TL	TRUE	reported	textfile	2	TRUE	0.00010646	50.2729
rs75664430	G	C	G	C	-0.0235179	-0.00777787	0.248028	0.192944	FALSE	TRUE	FALSE	0.0697897	0.911262	314857	CLL	TRUE	reported	0.0023186	3.6e-24	472174	TL	TRUE	reported	textfile	2	TRUE	0.000217846	102.883
rs76065543	T	C	T	C	0.0342843	0.0320199	0.137527	0.189227	FALSE	FALSE	FALSE	0.0712276	0.65304	314857	CLL	TRUE	reported	0.00290708	4.2e-32	472174	TL	TRUE	reported	textfile	2	TRUE	0.000294474	139.083
rs76094497	A	G	A	G	0.0278689	0.229128	0.051569	0.0321944	FALSE	FALSE	FALSE	0.171138	0.18062	314857	CLL	TRUE	reported	0.00461731	1.6e-09	472174	TL	TRUE	reported	textfile	2	TRUE	7.71482e-05	36.43
rs76219171	A	G	A	G	0.0359839	0.0216706	0.058433	0.0366913	FALSE	FALSE	FALSE	0.148796	0.884205	314857	CLL	TRUE	reported	0.00431741	7.8e-17	472174	TL	TRUE	reported	textfile	2	TRUE	0.000147097	69.4653
rs762679	A	T	A	T	0.0310104	0.0761755	0.856501	0.836606	FALSE	TRUE	FALSE	0.0728512	0.295732	314857	CLL	TRUE	reported	0.00285024	1.4e-27	472174	TL	TRUE	reported	textfile	2	TRUE	0.000250635	118.372
rs76666449	C	T	C	T	0.0295125	0.0191176	0.100625	0.141452	FALSE	FALSE	FALSE	0.0799173	0.810937	314857	CLL	TRUE	reported	0.00333186	8.2e-19	472174	TL	TRUE	reported	textfile	2	TRUE	0.000166136	78.4579
rs77231040	C	G	C	G	0.0989303	-0.110133	0.005742	0.0247476	FALSE	TRUE	FALSE	0.169096	0.514852	314857	CLL	TRUE	reported	0.0134649	2e-13	472174	TL	TRUE	reported	textfile	2	TRUE	0.000114314	53.9822
rs7726159	A	C	A	C	0.0707719	0.264682	0.327295	0.392427	FALSE	FALSE	FALSE	0.0561642	2.44529e-06	314857	CLL	TRUE	reported	0.0021282	1e-200	472174	TL	TRUE	reported	textfile	2	TRUE	0.00233657	1105.85
rs7772289	T	G	T	G	0.017549	0.00627763	0.503081	0.617515	FALSE	FALSE	FALSE	0.0568587	0.912086	314857	CLL	TRUE	reported	0.00200003	1.7e-18	472174	TL	TRUE	reported	textfile	2	TRUE	0.000163027	76.9892
rs77732866	A	G	A	G	0.0177942	0.0365321	0.137597	0.146243	FALSE	FALSE	FALSE	0.0791473	0.644389	314857	CLL	TRUE	reported	0.00290595	9.2e-10	472174	TL	TRUE	reported	textfile	2	TRUE	7.94043e-05	37.4955
rs7790856	T	C	T	C	-0.0437199	0.0643731	0.289139	0.239486	FALSE	FALSE	FALSE	0.0657688	0.327689	314857	CLL	TRUE	reported	0.00220526	1.8e-87	472174	TL	TRUE	reported	textfile	2	TRUE	0.000831716	393.04
rs78491606	C	A	C	A	-0.0756311	-0.0835383	0.018433	0.0260244	FALSE	FALSE	FALSE	0.168458	0.619966	314857	CLL	TRUE	reported	0.00741168	1.9e-24	472174	TL	TRUE	reported	textfile	2	TRUE	0.00022048	104.128
rs79977579	A	C	A	C	0.0281517	-0.140647	0.09555	0.0867177	FALSE	FALSE	FALSE	0.0930406	0.130616	314857	CLL	TRUE	reported	0.00343182	2.3e-16	472174	TL	TRUE	reported	textfile	2	TRUE	0.000142494	67.2912
rs80116508	A	G	A	G	-0.0352672	-0.0752367	0.062356	0.0739903	FALSE	FALSE	FALSE	0.102164	0.461471	314857	CLL	TRUE	reported	0.00415151	2e-17	472174	TL	TRUE	reported	textfile	2	TRUE	0.000152813	72.1652
rs80324517	A	G	A	G	0.0396515	0.107961	0.048259	0.0671275	FALSE	FALSE	FALSE	0.115348	0.349294	314857	CLL	TRUE	reported	0.00466286	1.8e-17	472174	TL	TRUE	reported	textfile	2	TRUE	0.000153125	72.3124
rs8102497	A	G	A	G	-0.0149654	-0.037708	0.431828	0.440736	FALSE	FALSE	FALSE	0.0556362	0.497924	314857	CLL	TRUE	reported	0.0020233	1.4e-13	472174	TL	TRUE	reported	textfile	2	TRUE	0.000115852	54.7084
rs8105767	G	A	G	A	0.0328384	0.0674642	0.29467	0.328302	FALSE	FALSE	FALSE	0.0595463	0.257227	314857	CLL	TRUE	reported	0.00220117	2.5e-50	472174	TL	TRUE	reported	textfile	2	TRUE	0.00047114	222.564
rs869785	C	T	C	T	-0.0147303	-0.0654	0.672471	0.644317	FALSE	FALSE	FALSE	0.0582791	0.261784	314857	CLL	TRUE	reported	0.00212801	4.4e-12	472174	TL	TRUE	reported	textfile	2	TRUE	0.000101468	47.9153
rs871134	T	C	T	C	-0.0182986	0.023114	0.569032	0.555874	FALSE	FALSE	FALSE	0.0556425	0.677849	314857	CLL	TRUE	reported	0.0020263	1.7e-19	472174	TL	TRUE	reported	textfile	2	TRUE	0.000172684	81.5505
rs932002	T	C	T	C	-0.0402052	-0.0539403	0.150843	0.226779	FALSE	FALSE	FALSE	0.0650263	0.406812	314857	CLL	TRUE	reported	0.00279667	7.3e-47	472174	TL	TRUE	reported	textfile	2	TRUE	0.000437512	206.671
rs9398196	G	A	G	A	-0.0143586	-0.000616184	0.52005	0.616799	FALSE	FALSE	FALSE	0.0572896	0.991418	314857	CLL	TRUE	reported	0.00201175	9.5e-13	472174	TL	TRUE	reported	textfile	2	TRUE	0.000107877	50.9418
rs939916	A	G	A	G	0.0241795	0.0634523	0.669967	0.743856	FALSE	FALSE	FALSE	0.062184	0.307541	314857	CLL	TRUE	reported	0.00216724	6.6e-29	472174	TL	TRUE	reported	textfile	2	TRUE	0.000263551	124.474
rs9419958	C	T	C	T	-0.0810098	-0.252453	0.86139	0.859261	FALSE	FALSE	FALSE	0.0807553	0.00177109	314857	CLL	TRUE	reported	0.00293847	2.6e-167	472174	TL	TRUE	reported	textfile	2	TRUE	0.00160706	760.03
rs9600019	T	C	T	C	0.0127134	0.00010294	0.335579	0.371894	FALSE	FALSE	FALSE	0.0575315	0.998572	314857	CLL	TRUE	reported	0.00213096	2.4e-09	472174	TL	TRUE	reported	textfile	2	TRUE	7.53769e-05	35.5935
rs9878436	T	C	T	C	-0.0143407	0.0138251	0.434393	0.358794	FALSE	FALSE	FALSE	0.057568	0.810212	314857	CLL	TRUE	reported	0.00201819	1.2e-12	472174	TL	TRUE	reported	textfile	2	TRUE	0.000106922	50.4911
rs9955360	A	C	A	C	-0.0190311	0.0931163	0.869288	0.867415	FALSE	FALSE	FALSE	0.0795077	0.241534	314857	CLL	TRUE	reported	0.00299791	2.2e-10	472174	TL	TRUE	reported	textfile	2	TRUE	8.53398e-05	40.2985

## Sheet: chronic myeloid leukemia
SNP	effect_allele.exposure	other_allele.exposure	effect_allele.outcome	other_allele.outcome	beta.exposure	beta.outcome	eaf.exposure	eaf.outcome	remove	palindromic	ambiguous	se.outcome	pval.outcome	samplesize.outcome	outcome	mr_keep.outcome	pval_origin.outcome	se.exposure	pval.exposure	samplesize.exposure	exposure	mr_keep.exposure	pval_origin.exposure	data_source.exposure	action	mr_keep	R2	F
rs10112752	A	G	A	G	-0.0287522	-0.00173935	0.430369	0.45185	FALSE	FALSE	FALSE	0.132988	0.989565	314307	CML	TRUE	reported	0.00202518	9.5e-46	472174	TL	TRUE	reported	textfile	2	TRUE	0.000426705	201.564
rs1023767	A	G	A	G	-0.0183732	-0.305995	0.237595	0.3	FALSE	FALSE	FALSE	0.137026	0.0255417	314307	CML	TRUE	reported	0.00234772	5e-15	472174	TL	TRUE	reported	textfile	2	TRUE	0.000129694	61.2456
rs10768683	G	C	G	C	0.0469922	0.129908	0.841033	0.813316	FALSE	TRUE	FALSE	0.163488	0.426846	314307	CML	TRUE	reported	0.00277015	1.5e-64	472174	TL	TRUE	reported	textfile	2	TRUE	0.000609086	287.768
rs10773176	G	A	G	A	-0.0172009	-0.250792	0.741214	0.767383	FALSE	FALSE	FALSE	0.16828	0.136139	314307	CML	TRUE	reported	0.00228534	5.2e-14	472174	TL	TRUE	reported	textfile	2	TRUE	0.000119963	56.6499
rs10774624	A	G	A	G	0.0149944	-0.0367283	0.53276	0.59214	FALSE	FALSE	FALSE	0.135235	0.785939	314307	CML	TRUE	reported	0.00205494	2.9e-13	472174	TL	TRUE	reported	textfile	2	TRUE	0.000112748	53.2425
rs10805346	C	T	C	T	0.0117072	0.0937786	0.439339	0.47867	FALSE	FALSE	FALSE	0.134251	0.484844	314307	CML	TRUE	reported	0.00202147	7e-09	472174	TL	TRUE	reported	textfile	2	TRUE	7.10295e-05	33.5405
rs10840270	G	C	G	C	0.014383	-0.0222701	0.655684	0.659301	FALSE	TRUE	FALSE	0.140382	0.873953	314307	CML	TRUE	reported	0.00212494	1.3e-11	472174	TL	TRUE	reported	textfile	2	TRUE	9.702e-05	45.8146
rs10845387	A	G	A	G	-0.0141214	0.034036	0.352666	0.353504	FALSE	FALSE	FALSE	0.141994	0.810563	314307	CML	TRUE	reported	0.00209396	1.5e-11	472174	TL	TRUE	reported	textfile	2	TRUE	9.63108e-05	45.4796
rs10905255	T	G	T	G	-0.0182493	0.0479469	0.57919	0.570009	FALSE	FALSE	FALSE	0.133191	0.718858	314307	CML	TRUE	reported	0.00203099	2.6e-19	472174	TL	TRUE	reported	textfile	2	TRUE	0.000170962	80.7374
rs10936598	C	A	C	A	-0.0656433	0.015164	0.32379	0.348662	FALSE	FALSE	FALSE	0.139159	0.913228	314307	CML	TRUE	reported	0.00214663	1e-200	472174	TL	TRUE	reported	textfile	2	TRUE	0.00197654	935.114
rs11085072	T	C	T	C	-0.0131806	-0.390082	0.236909	0.108781	FALSE	FALSE	FALSE	0.180731	0.0309008	314307	CML	TRUE	reported	0.00236713	2.6e-08	472174	TL	TRUE	reported	textfile	2	TRUE	6.56592e-05	31.0045
rs11117354	C	T	C	T	0.0232506	-0.303645	0.696513	0.491304	FALSE	FALSE	FALSE	0.1208	0.0119503	314307	CML	TRUE	reported	0.00219601	3.4e-26	472174	TL	TRUE	reported	textfile	2	TRUE	0.000237353	112.098
rs111527438	C	T	C	T	0.0125	0.0748496	0.351251	0.332481	FALSE	FALSE	FALSE	0.142503	0.59941	314307	CML	TRUE	reported	0.00211016	3.1e-09	472174	TL	TRUE	reported	textfile	2	TRUE	7.43113e-05	35.0903
rs111950327	C	G	C	G	0.0238271	-0.16659	0.063628	0.0448252	FALSE	TRUE	FALSE	0.294564	0.5717	314307	CML	TRUE	reported	0.00409406	5.9e-09	472174	TL	TRUE	reported	textfile	2	TRUE	7.173e-05	33.8713
rs112394943	C	T	C	T	-0.0198961	-0.0175324	0.162741	0.235925	FALSE	FALSE	FALSE	0.157652	0.91145	314307	CML	TRUE	reported	0.00281641	1.6e-12	472174	TL	TRUE	reported	textfile	2	TRUE	0.000105681	49.9048
rs113525195	A	C	A	C	-0.0124075	-0.21282	0.290254	0.255942	FALSE	FALSE	FALSE	0.144239	0.140085	314307	CML	TRUE	reported	0.00224132	3.1e-08	472174	TL	TRUE	reported	textfile	2	TRUE	6.48979e-05	30.645
rs11557154	T	C	T	C	-0.0343719	0.206677	0.13003	0.156436	FALSE	FALSE	FALSE	0.195086	0.289412	314307	CML	TRUE	reported	0.00298538	1.1e-30	472174	TL	TRUE	reported	textfile	2	TRUE	0.000280662	132.558
rs11579626	C	A	C	A	0.0265113	-0.201701	0.084882	0.100051	FALSE	FALSE	FALSE	0.202324	0.318802	314307	CML	TRUE	reported	0.00357752	1.3e-13	472174	TL	TRUE	reported	textfile	2	TRUE	0.000116291	54.9156
rs11584821	T	C	T	C	-0.0306517	-0.102111	0.176208	0.165166	FALSE	FALSE	FALSE	0.172624	0.55417	314307	CML	TRUE	reported	0.00263623	3e-31	472174	TL	TRUE	reported	textfile	2	TRUE	0.000286231	135.189
rs116863223	A	G	A	G	-0.0817874	-0.726405	0.011763	0.00439898	FALSE	FALSE	FALSE	0.54009	0.178635	314307	CML	TRUE	reported	0.00937157	2.6e-18	472174	TL	TRUE	reported	textfile	2	TRUE	0.000161278	76.1634
rs117034449	A	G	A	G	0.0374377	0.154329	0.023304	0.0173913	FALSE	FALSE	FALSE	0.544952	0.777027	314307	CML	TRUE	reported	0.00667898	2.1e-08	472174	TL	TRUE	reported	textfile	2	TRUE	6.65376e-05	31.4193
rs117407747	T	C	T	C	0.0450533	1.58663	0.027571	0.0267008	FALSE	FALSE	FALSE	0.656432	0.0156466	314307	CML	TRUE	reported	0.00611706	1.8e-13	472174	TL	TRUE	reported	textfile	2	TRUE	0.000114872	54.2458
rs11746381	C	T	C	T	0.0329955	0.084085	0.0568	0.0782609	FALSE	FALSE	FALSE	0.254349	0.740955	314307	CML	TRUE	reported	0.00431036	1.9e-14	472174	TL	TRUE	reported	textfile	2	TRUE	0.000124087	58.5977
rs117630647	A	G	A	G	0.059565	0.857782	0.021346	0.0391304	FALSE	FALSE	FALSE	0.364141	0.018491	314307	CML	TRUE	reported	0.00720413	1.4e-16	472174	TL	TRUE	reported	textfile	2	TRUE	0.000144762	68.3624
rs11769630	A	T	A	T	-0.0256807	0.110125	0.072227	0.112668	FALSE	TRUE	FALSE	0.218464	0.6142	314307	CML	TRUE	reported	0.00389475	4.3e-11	472174	TL	TRUE	reported	textfile	2	TRUE	9.20688e-05	43.4763
rs11991877	A	T	A	T	-0.030138	-0.216993	0.889309	0.830435	FALSE	TRUE	FALSE	0.189492	0.252156	314307	CML	TRUE	reported	0.00318686	3.2e-21	472174	TL	TRUE	reported	textfile	2	TRUE	0.000189373	89.4337
rs12369950	C	T	C	T	-0.0178308	-0.053641	0.140675	0.143478	FALSE	FALSE	FALSE	0.184977	0.771825	314307	CML	TRUE	reported	0.00290205	8e-10	472174	TL	TRUE	reported	textfile	2	TRUE	7.99457e-05	37.7511
rs12412214	A	G	A	G	-0.0245174	0.0431964	0.279765	0.40399	FALSE	FALSE	FALSE	0.134563	0.748201	314307	CML	TRUE	reported	0.00222685	3.4e-28	472174	TL	TRUE	reported	textfile	2	TRUE	0.000256657	121.217
rs12451892	C	T	C	T	-0.0116145	-0.156913	0.380511	0.395277	FALSE	FALSE	FALSE	0.133687	0.240502	314307	CML	TRUE	reported	0.00207578	2.2e-08	472174	TL	TRUE	reported	textfile	2	TRUE	6.62991e-05	31.3066
rs1291143	C	A	C	A	0.0493145	-0.10813	0.849026	0.756522	FALSE	FALSE	FALSE	0.158539	0.495211	314307	CML	TRUE	reported	0.0027991	1.8e-69	472174	TL	TRUE	reported	textfile	2	TRUE	0.000656939	310.392
rs12925933	C	A	C	A	-0.0146622	0.0421216	0.66221	0.549548	FALSE	FALSE	FALSE	0.133644	0.752626	314307	CML	TRUE	reported	0.00213796	7e-12	472174	TL	TRUE	reported	textfile	2	TRUE	9.95987e-05	47.0324
rs12932179	G	A	G	A	-0.0136257	-0.109642	0.561399	0.588355	FALSE	FALSE	FALSE	0.135533	0.418533	314307	CML	TRUE	reported	0.0020276	1.8e-11	472174	TL	TRUE	reported	textfile	2	TRUE	9.56334e-05	45.1597
rs13062095	C	T	C	T	0.0138552	-0.282278	0.327843	0.305286	FALSE	FALSE	FALSE	0.136315	0.0383804	314307	CML	TRUE	reported	0.00214113	9.7e-11	472174	TL	TRUE	reported	textfile	2	TRUE	8.86745e-05	41.8733
rs13230646	C	T	C	T	-0.0173277	-0.203173	0.248945	0.144569	FALSE	FALSE	FALSE	0.174758	0.244993	314307	CML	TRUE	reported	0.00232377	8.9e-14	472174	TL	TRUE	reported	textfile	2	TRUE	0.000117745	55.6024
rs1332941	G	A	G	A	0.0256552	0.111146	0.820466	0.811833	FALSE	FALSE	FALSE	0.163225	0.49591	314307	CML	TRUE	reported	0.00273159	5.9e-21	472174	TL	TRUE	reported	textfile	2	TRUE	0.000186783	88.21
rs137901416	A	G	A	G	0.04572	-0.00364264	0.100311	0.0652174	FALSE	FALSE	FALSE	0.267547	0.989137	314307	CML	TRUE	reported	0.00332355	4.7e-43	472174	TL	TRUE	reported	textfile	2	TRUE	0.000400619	189.237
rs139669835	T	C	T	C	-0.0612563	-1.01891	0.009365		FALSE	FALSE	FALSE	2.02746	0.615279	314307	CML	TRUE	reported	0.0105346	6.1e-09	472174	TL	TRUE	reported	textfile	2	TRUE	7.16032e-05	33.8114
rs139795227	C	A	C	A	0.0599379	-0.383099	0.014021	0.0173913	FALSE	FALSE	FALSE	0.406445	0.345905	314307	CML	TRUE	reported	0.00873247	6.7e-12	472174	TL	TRUE	reported	textfile	2	TRUE	9.97662e-05	47.1115
rs141214782	TTATC	T	TTATC	T	-0.0246687	0.199712	0.101206	0.121739	FALSE	FALSE	FALSE	0.217275	0.358009	314307	CML	TRUE	reported	0.00335723	2e-13	472174	TL	TRUE	reported	textfile	2	TRUE	0.000114335	53.9919
rs144204502	T	C	T	C	-0.100574	-0.0836573	0.012562	0.0347826	FALSE	FALSE	FALSE	0.345581	0.80872	314307	CML	TRUE	reported	0.00913369	3.4e-28	472174	TL	TRUE	reported	textfile	2	TRUE	0.000256723	121.249
rs145114957	G	C	G	C	0.0272605	0.091469	0.042648	0.0434783	FALSE	TRUE	FALSE	0.337348	0.786281	314307	CML	TRUE	reported	0.00498872	4.6e-08	472174	TL	TRUE	reported	textfile	2	TRUE	6.32353e-05	29.8598
rs150150565	T	C	T	C	0.063762	-0.789949	0.021455	0.00434783	FALSE	FALSE	FALSE	0.485056	0.103404	314307	CML	TRUE	reported	0.00739877	6.8e-18	472174	TL	TRUE	reported	textfile	2	TRUE	0.000157266	74.2682
rs16978028	T	A	T	A	-0.029945	0.0287773	0.143727	0.0825575	FALSE	TRUE	FALSE	0.242645	0.905593	314307	CML	TRUE	reported	0.00285068	8.2e-26	472174	TL	TRUE	reported	textfile	2	TRUE	0.000233641	110.344
rs17445108	A	G	A	G	-0.0168922	-0.306964	0.12695	0.0936573	FALSE	FALSE	FALSE	0.200255	0.125309	314307	CML	TRUE	reported	0.00300983	2e-08	472174	TL	TRUE	reported	textfile	2	TRUE	6.67049e-05	31.4983
rs17677991	G	C	G	C	0.0222664	-0.130058	0.342123	0.362864	FALSE	TRUE	FALSE	0.135822	0.338281	314307	CML	TRUE	reported	0.00210806	4.4e-26	472174	TL	TRUE	reported	textfile	2	TRUE	0.000236227	111.566
rs182059586	C	T	C	T	-0.0571159	-1.01779	0.02511		FALSE	FALSE	FALSE	0.761744	0.181505	314307	CML	TRUE	reported	0.00680853	4.9e-17	472174	TL	TRUE	reported	textfile	2	TRUE	0.000149019	70.3729
rs185174247	A	G	A	G	0.0372806	-0.282453	0.05609	0.0217391	FALSE	FALSE	FALSE	0.389871	0.468772	314307	CML	TRUE	reported	0.00435145	1.1e-17	472174	TL	TRUE	reported	textfile	2	TRUE	0.000155428	73.4
rs188918174	T	C	T	C	0.0403062	-0.419983	0.036106	0.0284228	FALSE	FALSE	FALSE	0.315505	0.183142	314307	CML	TRUE	reported	0.00543604	1.2e-13	472174	TL	TRUE	reported	textfile	2	TRUE	0.00011642	54.9764
rs1907702	A	G	A	G	0.0150247	0.15981	0.766771	0.821739	FALSE	FALSE	FALSE	0.164512	0.331339	314307	CML	TRUE	reported	0.00242651	5.9e-10	472174	TL	TRUE	reported	textfile	2	TRUE	8.11914e-05	38.3394
rs1957937	T	A	T	A	0.0209365	0.0873251	0.16018	0.195652	FALSE	TRUE	FALSE	0.170655	0.608857	314307	CML	TRUE	reported	0.00273361	1.9e-14	472174	TL	TRUE	reported	textfile	2	TRUE	0.000124216	58.6588
rs1985369	G	A	G	A	-0.0311893	-0.110462	0.868178	0.881194	FALSE	FALSE	FALSE	0.213445	0.604793	314307	CML	TRUE	reported	0.00300952	3.6e-25	472174	TL	TRUE	reported	textfile	2	TRUE	0.000227413	107.403
rs201009932	T	TA	T	TA	0.0769296	-0.233825	0.991068	0.97185	FALSE	FALSE	FALSE	0.446745	0.600699	314307	CML	TRUE	reported	0.0116209	3.6e-11	472174	TL	TRUE	reported	textfile	2	TRUE	9.28036e-05	43.8234
rs2056726	A	G	A	G	-0.0228078	0.164753	0.214376	0.256436	FALSE	FALSE	FALSE	0.157969	0.296974	314307	CML	TRUE	reported	0.00243638	7.9e-21	472174	TL	TRUE	reported	textfile	2	TRUE	0.000185564	87.6345
rs2230590	C	T	C	T	-0.0158022	0.128502	0.510897	0.434783	FALSE	FALSE	FALSE	0.135093	0.341498	314307	CML	TRUE	reported	0.00200806	3.6e-15	472174	TL	TRUE	reported	textfile	2	TRUE	0.000131136	61.927
rs2282764	G	A	G	A	-0.0224234	-0.0242071	0.142384	0.13913	FALSE	FALSE	FALSE	0.18922	0.898204	314307	CML	TRUE	reported	0.00289392	9.3e-15	472174	TL	TRUE	reported	textfile	2	TRUE	0.000127137	60.0383
rs2293579	A	G	A	G	-0.012915	0.144645	0.386274	0.321739	FALSE	FALSE	FALSE	0.145899	0.321485	314307	CML	TRUE	reported	0.00205481	3.3e-10	472174	TL	TRUE	reported	textfile	2	TRUE	8.36579e-05	39.5042
rs2538745	C	T	C	T	-0.012942	-0.0182705	0.602841	0.526087	FALSE	FALSE	FALSE	0.13219	0.890071	314307	CML	TRUE	reported	0.002056	3.1e-10	472174	TL	TRUE	reported	textfile	2	TRUE	8.39108e-05	39.6237
rs2555104	C	A	C	A	-0.0139717	0.0409158	0.434255	0.491304	FALSE	FALSE	FALSE	0.132297	0.757114	314307	CML	TRUE	reported	0.00203498	6.6e-12	472174	TL	TRUE	reported	textfile	2	TRUE	9.98235e-05	47.1386
rs2763979	T	C	T	C	-0.0277713	-0.0278571	0.359721	0.430435	FALSE	FALSE	FALSE	0.133182	0.834318	314307	CML	TRUE	reported	0.00208092	1.3e-40	472174	TL	TRUE	reported	textfile	2	TRUE	0.000377065	178.107
rs28577594	C	G	C	G	0.0187657	0.0589568	0.709829	0.723103	FALSE	TRUE	FALSE	0.146467	0.687298	314307	CML	TRUE	reported	0.00224024	5.4e-17	472174	TL	TRUE	reported	textfile	2	TRUE	0.000148585	70.1679
rs2967355	C	A	C	A	-0.0461595	0.406991	0.774276	0.886957	FALSE	FALSE	FALSE	0.175553	0.0204315	314307	CML	TRUE	reported	0.00238972	4e-83	472174	TL	TRUE	reported	textfile	2	TRUE	0.000789556	373.101
rs2977608	C	A	C	A	0.0129483	0.0565673	0.743949	0.6985	FALSE	FALSE	FALSE	0.143086	0.692593	314307	CML	TRUE	reported	0.00233716	3e-08	472174	TL	TRUE	reported	textfile	2	TRUE	6.50007e-05	30.6935
rs3093888	A	G	A	G	-0.028973	-0.113914	0.05131	0.0783973	FALSE	FALSE	FALSE	0.23377	0.626051	314307	CML	TRUE	reported	0.00452459	1.5e-10	472174	TL	TRUE	reported	textfile	2	TRUE	8.68338e-05	41.004
rs3767952	A	G	A	G	0.0134472	-0.135987	0.226709	0.195294	FALSE	FALSE	FALSE	0.1604	0.396548	314307	CML	TRUE	reported	0.00238826	1.8e-08	472174	TL	TRUE	reported	textfile	2	TRUE	6.71381e-05	31.7029
rs3785074	G	A	G	A	0.023863	-0.211998	0.289672	0.173913	FALSE	FALSE	FALSE	0.162259	0.191368	314307	CML	TRUE	reported	0.00220455	2.6e-27	472174	TL	TRUE	reported	textfile	2	TRUE	0.000248085	117.168
rs3891167	G	A	G	A	-0.0425685	0.125308	0.253435	0.274169	FALSE	FALSE	FALSE	0.153696	0.414901	314307	CML	TRUE	reported	0.00239551	1.2e-70	472174	TL	TRUE	reported	textfile	2	TRUE	0.000668326	315.776
rs41269079	A	T	A	T	0.0153617	-0.0356132	0.188991	0.204518	FALSE	TRUE	FALSE	0.161916	0.825911	314307	CML	TRUE	reported	0.0025499	1.7e-09	472174	TL	TRUE	reported	textfile	2	TRUE	7.68594e-05	36.2936
rs429358	C	T	C	T	0.0173498	-0.171629	0.153969	0.156522	FALSE	FALSE	FALSE	0.171392	0.316645	314307	CML	TRUE	reported	0.00277091	3.8e-10	472174	TL	TRUE	reported	textfile	2	TRUE	8.30244e-05	39.2051
rs4498805	T	G	T	G	0.0150601	-0.0372973	0.546632	0.495652	FALSE	FALSE	FALSE	0.132244	0.777918	314307	CML	TRUE	reported	0.00200376	5.7e-14	472174	TL	TRUE	reported	textfile	2	TRUE	0.000119622	56.4888
rs4530278	T	G	T	G	0.0138793	0.190947	0.59815	0.648303	FALSE	FALSE	FALSE	0.135487	0.158734	314307	CML	TRUE	reported	0.0020567	1.5e-11	472174	TL	TRUE	reported	textfile	2	TRUE	9.64382e-05	45.5398
rs45604339	T	C	T	C	-0.020433	0.0452107	0.34242	0.395601	FALSE	FALSE	FALSE	0.136244	0.740012	314307	CML	TRUE	reported	0.00211433	4.3e-22	472174	TL	TRUE	reported	textfile	2	TRUE	0.000197756	93.3936
rs4695407	G	A	G	A	0.0141511	0.15114	0.507843	0.508355	FALSE	FALSE	FALSE	0.132324	0.253372	314307	CML	TRUE	reported	0.00199925	1.5e-12	472174	TL	TRUE	reported	textfile	2	TRUE	0.000106096	50.1008
rs4724	A	G	A	G	-0.0547446	0.169679	0.116598	0.126087	FALSE	FALSE	FALSE	0.211362	0.422096	314307	CML	TRUE	reported	0.00312441	9.8e-69	472174	TL	TRUE	reported	textfile	2	TRUE	0.000649774	307.004
rs4731541	G	C	G	C	-0.0206119	-0.040726	0.624901	0.626036	FALSE	TRUE	FALSE	0.137434	0.766978	314307	CML	TRUE	reported	0.00205962	1.4e-23	472174	TL	TRUE	reported	textfile	2	TRUE	0.000212064	100.152
rs4743037	T	C	T	C	0.0147971	0.0014343	0.230874	0.217528	FALSE	FALSE	FALSE	0.159672	0.992833	314307	CML	TRUE	reported	0.00238094	5.1e-10	472174	TL	TRUE	reported	textfile	2	TRUE	8.17935e-05	38.6238
rs55747751	A	G	A	G	-0.0211612	0.321987	0.077375	0.0730435	FALSE	FALSE	FALSE	0.289668	0.266321	314307	CML	TRUE	reported	0.00375164	1.7e-08	472174	TL	TRUE	reported	textfile	2	TRUE	6.73763e-05	31.8153
rs56799554	G	A	G	A	-0.0259793	-0.266099	0.170183	0.191833	FALSE	FALSE	FALSE	0.156516	0.0891046	314307	CML	TRUE	reported	0.00267858	3e-22	472174	TL	TRUE	reported	textfile	2	TRUE	0.000199185	94.0684
rs5742915	C	T	C	T	0.0193377	0.162409	0.445829	0.443564	FALSE	FALSE	FALSE	0.134457	0.227093	314307	CML	TRUE	reported	0.00202886	1.6e-21	472174	TL	TRUE	reported	textfile	2	TRUE	0.000192362	90.8455
rs59409453	G	A	G	A	0.0202133	-0.0999977	0.730602	0.77821	FALSE	FALSE	FALSE	0.164414	0.543049	314307	CML	TRUE	reported	0.00230175	1.6e-18	472174	TL	TRUE	reported	textfile	2	TRUE	0.0001633	77.1181
rs6054257	A	G	A	G	-0.0141684	0.115747	0.793522	0.81763	FALSE	FALSE	FALSE	0.165303	0.483795	314307	CML	TRUE	reported	0.00247729	1.1e-08	472174	TL	TRUE	reported	textfile	2	TRUE	6.92717e-05	32.7104
rs611646	A	T	A	T	-0.0368309	-0.0164989	0.408685	0.39127	FALSE	TRUE	FALSE	0.135631	0.90318	314307	CML	TRUE	reported	0.00203547	3.5e-73	472174	TL	TRUE	reported	textfile	2	TRUE	0.000692934	327.411
rs61748181	T	C	T	C	-0.059181	0.598932	0.028928	0.0870929	FALSE	FALSE	FALSE	0.289113	0.038301	314307	CML	TRUE	reported	0.00595394	2.8e-23	472174	TL	TRUE	reported	textfile	2	TRUE	0.000209201	98.7993
rs6536702	A	G	A	G	0.0534148	0.346069	0.774647	0.865217	FALSE	FALSE	FALSE	0.169375	0.0410308	314307	CML	TRUE	reported	0.00238875	9.4e-111	472174	TL	TRUE	reported	textfile	2	TRUE	0.00105784	500.011
rs6584579	G	A	G	A	0.0114923	0.0708767	0.398876	0.33913	FALSE	FALSE	FALSE	0.141949	0.617561	314307	CML	TRUE	reported	0.00204674	2e-08	472174	TL	TRUE	reported	textfile	2	TRUE	6.67663e-05	31.5273
rs6587577	G	A	G	A	-0.0182148	0.211975	0.826346	0.869565	FALSE	FALSE	FALSE	0.180932	0.241369	314307	CML	TRUE	reported	0.0026359	4.8e-12	472174	TL	TRUE	reported	textfile	2	TRUE	0.000101122	47.7517
rs6659669	T	C	T	C	-0.0117091	0.242023	0.605095	0.643564	FALSE	FALSE	FALSE	0.133749	0.0703704	314307	CML	TRUE	reported	0.00205167	1.1e-08	472174	TL	TRUE	reported	textfile	2	TRUE	6.89763e-05	32.5709
rs6669563	A	G	A	G	0.0182358	-0.0271529	0.437768	0.463035	FALSE	FALSE	FALSE	0.133133	0.838391	314307	CML	TRUE	reported	0.00202476	2.1e-19	472174	TL	TRUE	reported	textfile	2	TRUE	0.000171762	81.1149
rs66731853	A	G	A	G	-0.0177791	0.367009	0.317304	0.269565	FALSE	FALSE	FALSE	0.141073	0.00928047	314307	CML	TRUE	reported	0.00215421	1.5e-16	472174	TL	TRUE	reported	textfile	2	TRUE	0.000144238	68.1148
rs6751209	C	T	C	T	-0.0140465	0.00465704	0.204231	0.182609	FALSE	FALSE	FALSE	0.17206	0.978407	314307	CML	TRUE	reported	0.00248465	1.6e-08	472174	TL	TRUE	reported	textfile	2	TRUE	6.76822e-05	31.9598
rs6776756	A	G	A	G	-0.0174439	-0.161574	0.597562	0.493896	FALSE	FALSE	FALSE	0.13319	0.225089	314307	CML	TRUE	reported	0.00203747	1.1e-17	472174	TL	TRUE	reported	textfile	2	TRUE	0.000155216	73.2998
rs6881568	A	C	A	C	0.0169256	-0.189503	0.36258	0.234919	FALSE	FALSE	FALSE	0.148541	0.202038	314307	CML	TRUE	reported	0.00207735	3.7e-16	472174	TL	TRUE	reported	textfile	2	TRUE	0.000140574	66.3845
rs7099229	A	G	A	G	-0.0153288	-0.099259	0.273301	0.165575	FALSE	FALSE	FALSE	0.173604	0.567487	314307	CML	TRUE	reported	0.00224403	8.4e-12	472174	TL	TRUE	reported	textfile	2	TRUE	9.8813e-05	46.6613
rs7164950	G	A	G	A	0.0129362	0.119776	0.405979	0.448713	FALSE	FALSE	FALSE	0.134385	0.372774	314307	CML	TRUE	reported	0.00204001	2.3e-10	472174	TL	TRUE	reported	textfile	2	TRUE	8.51549e-05	40.2112
rs7209057	A	G	A	G	0.011819	0.139532	0.561044	0.585132	FALSE	FALSE	FALSE	0.13307	0.29438	314307	CML	TRUE	reported	0.00202865	5.7e-09	472174	TL	TRUE	reported	textfile	2	TRUE	7.1881e-05	33.9426
rs7221585	T	C	T	C	0.0143271	0.187854	0.22401	0.320955	FALSE	FALSE	FALSE	0.146603	0.200059	314307	CML	TRUE	reported	0.00247042	6.7e-09	472174	TL	TRUE	reported	textfile	2	TRUE	7.12266e-05	33.6336
rs73581419	T	C	T	C	0.0229838	0.147479	0.106605	0.0960102	FALSE	FALSE	FALSE	0.236844	0.533492	314307	CML	TRUE	reported	0.00324156	1.3e-12	472174	TL	TRUE	reported	textfile	2	TRUE	0.00010646	50.2729
rs75664430	G	C	G	C	-0.0235179	-0.19968	0.248028	0.160921	FALSE	TRUE	FALSE	0.168332	0.235531	314307	CML	TRUE	reported	0.0023186	3.6e-24	472174	TL	TRUE	reported	textfile	2	TRUE	0.000217846	102.883
rs76065543	T	C	T	C	0.0342843	0.0123654	0.137527	0.182558	FALSE	FALSE	FALSE	0.171618	0.942561	314307	CML	TRUE	reported	0.00290708	4.2e-32	472174	TL	TRUE	reported	textfile	2	TRUE	0.000294474	139.083
rs76094497	A	G	A	G	0.0278689	0.337178	0.051569	0.0327877	FALSE	FALSE	FALSE	0.42725	0.430005	314307	CML	TRUE	reported	0.00461731	1.6e-09	472174	TL	TRUE	reported	textfile	2	TRUE	7.71482e-05	36.43
rs76219171	A	G	A	G	0.0359839	-0.307796	0.058433	0.026087	FALSE	FALSE	FALSE	0.349783	0.378879	314307	CML	TRUE	reported	0.00431741	7.8e-17	472174	TL	TRUE	reported	textfile	2	TRUE	0.000147097	69.4653
rs762679	A	T	A	T	0.0310104	0.169149	0.856501	0.853453	FALSE	TRUE	FALSE	0.175576	0.335349	314307	CML	TRUE	reported	0.00285024	1.4e-27	472174	TL	TRUE	reported	textfile	2	TRUE	0.000250635	118.372
rs76666449	C	T	C	T	0.0295125	0.121039	0.100625	0.147826	FALSE	FALSE	FALSE	0.193567	0.53177	314307	CML	TRUE	reported	0.00333186	8.2e-19	472174	TL	TRUE	reported	textfile	2	TRUE	0.000166136	78.4579
rs77231040	C	G	C	G	0.0989303	0.277409	0.005742	0.0304348	FALSE	TRUE	FALSE	0.432193	0.520962	314307	CML	TRUE	reported	0.0134649	2e-13	472174	TL	TRUE	reported	textfile	2	TRUE	0.000114314	53.9822
rs7726159	A	C	A	C	0.0707719	-0.0118879	0.327295	0.320921	FALSE	FALSE	FALSE	0.141317	0.932959	314307	CML	TRUE	reported	0.0021282	1e-200	472174	TL	TRUE	reported	textfile	2	TRUE	0.00233657	1105.85
rs7772289	T	G	T	G	0.017549	-0.0212557	0.503081	0.613043	FALSE	FALSE	FALSE	0.136098	0.875892	314307	CML	TRUE	reported	0.00200003	1.7e-18	472174	TL	TRUE	reported	textfile	2	TRUE	0.000163027	76.9892
rs77732866	A	G	A	G	0.0177942	0.313131	0.137597	0.178039	FALSE	FALSE	FALSE	0.190632	0.100466	314307	CML	TRUE	reported	0.00290595	9.2e-10	472174	TL	TRUE	reported	textfile	2	TRUE	7.94043e-05	37.4955
rs7790856	T	C	T	C	-0.0437199	-0.179023	0.289139	0.195652	FALSE	FALSE	FALSE	0.157653	0.256145	314307	CML	TRUE	reported	0.00220526	1.8e-87	472174	TL	TRUE	reported	textfile	2	TRUE	0.000831716	393.04
rs78491606	C	A	C	A	-0.0756311	0.0788361	0.018433	0.0304348	FALSE	FALSE	FALSE	0.400666	0.844013	314307	CML	TRUE	reported	0.00741168	1.9e-24	472174	TL	TRUE	reported	textfile	2	TRUE	0.00022048	104.128
rs79977579	A	C	A	C	0.0281517	0.349452	0.09555	0.126138	FALSE	FALSE	FALSE	0.223963	0.118686	314307	CML	TRUE	reported	0.00343182	2.3e-16	472174	TL	TRUE	reported	textfile	2	TRUE	0.000142494	67.2912
rs80116508	A	G	A	G	-0.0352672	0.315434	0.062356	0.104348	FALSE	FALSE	FALSE	0.24289	0.194056	314307	CML	TRUE	reported	0.00415151	2e-17	472174	TL	TRUE	reported	textfile	2	TRUE	0.000152813	72.1652
rs80324517	A	G	A	G	0.0396515	0.0567001	0.048259	0.065439	FALSE	FALSE	FALSE	0.274073	0.836104	314307	CML	TRUE	reported	0.00466286	1.8e-17	472174	TL	TRUE	reported	textfile	2	TRUE	0.000153125	72.3124
rs8102497	A	G	A	G	-0.0149654	-0.103204	0.431828	0.425916	FALSE	FALSE	FALSE	0.132971	0.437667	314307	CML	TRUE	reported	0.0020233	1.4e-13	472174	TL	TRUE	reported	textfile	2	TRUE	0.000115852	54.7084
rs8105767	G	A	G	A	0.0328384	-0.111133	0.29467	0.291304	FALSE	FALSE	FALSE	0.142112	0.434208	314307	CML	TRUE	reported	0.00220117	2.5e-50	472174	TL	TRUE	reported	textfile	2	TRUE	0.00047114	222.564
rs869785	C	T	C	T	-0.0147303	-0.105457	0.672471	0.639165	FALSE	FALSE	FALSE	0.140039	0.451418	314307	CML	TRUE	reported	0.00212801	4.4e-12	472174	TL	TRUE	reported	textfile	2	TRUE	0.000101468	47.9153
rs871134	T	C	T	C	-0.0182986	-0.053544	0.569032	0.548014	FALSE	FALSE	FALSE	0.13349	0.68834	314307	CML	TRUE	reported	0.0020263	1.7e-19	472174	TL	TRUE	reported	textfile	2	TRUE	0.000172684	81.5505
rs932002	T	C	T	C	-0.0402052	-0.0691891	0.150843	0.223171	FALSE	FALSE	FALSE	0.155423	0.656198	314307	CML	TRUE	reported	0.00279667	7.3e-47	472174	TL	TRUE	reported	textfile	2	TRUE	0.000437512	206.671
rs9398196	G	A	G	A	-0.0143586	0.0382421	0.52005	0.636266	FALSE	FALSE	FALSE	0.137119	0.780324	314307	CML	TRUE	reported	0.00201175	9.5e-13	472174	TL	TRUE	reported	textfile	2	TRUE	0.000107877	50.9418
rs939916	A	G	A	G	0.0241795	0.0981631	0.669967	0.7526	FALSE	FALSE	FALSE	0.14904	0.51013	314307	CML	TRUE	reported	0.00216724	6.6e-29	472174	TL	TRUE	reported	textfile	2	TRUE	0.000263551	124.474
rs9419958	C	T	C	T	-0.0810098	-0.185591	0.86139	0.869685	FALSE	FALSE	FALSE	0.209993	0.376805	314307	CML	TRUE	reported	0.00293847	2.6e-167	472174	TL	TRUE	reported	textfile	2	TRUE	0.00160706	760.03
rs9600019	T	C	T	C	0.0127134	-0.130129	0.335579	0.343632	FALSE	FALSE	FALSE	0.13733	0.343353	314307	CML	TRUE	reported	0.00213096	2.4e-09	472174	TL	TRUE	reported	textfile	2	TRUE	7.53769e-05	35.5935
rs9878436	T	C	T	C	-0.0143407	-0.168725	0.434393	0.31335	FALSE	FALSE	FALSE	0.138079	0.221728	314307	CML	TRUE	reported	0.00201819	1.2e-12	472174	TL	TRUE	reported	textfile	2	TRUE	0.000106922	50.4911
rs9955360	A	C	A	C	-0.0190311	0.294443	0.869288	0.891049	FALSE	FALSE	FALSE	0.189146	0.119543	314307	CML	TRUE	reported	0.00299791	2.2e-10	472174	TL	TRUE	reported	textfile	2	TRUE	8.53398e-05	40.2985

## Sheet: diffuse large b-cell lymphoma
SNP	effect_allele.exposure	other_allele.exposure	effect_allele.outcome	other_allele.outcome	beta.exposure	beta.outcome	eaf.exposure	eaf.outcome	remove	palindromic	ambiguous	se.outcome	pval.outcome	samplesize.outcome	outcome	mr_keep.outcome	pval_origin.outcome	se.exposure	pval.exposure	samplesize.exposure	exposure	mr_keep.exposure	pval_origin.exposure	data_source.exposure	action	mr_keep	R2	F
rs1003322	A	C	A	C	0.0141734	0.00765823	0.213742	0.14476	FALSE	FALSE	FALSE	0.0628521	0.903022	315243	DLBCL	TRUE	reported	0.00247546	1e-08	472174	TL	TRUE	reported	textfile	2	TRUE	6.94231e-05	32.7819
rs10112752	A	G	A	G	-0.0287522	-0.000345589	0.430369	0.445716	FALSE	FALSE	FALSE	0.0443703	0.993786	315243	DLBCL	TRUE	reported	0.00202518	9.5e-46	472174	TL	TRUE	reported	textfile	2	TRUE	0.000426705	201.564
rs1023767	A	G	A	G	-0.0183732	-0.00589929	0.237595	0.372911	FALSE	FALSE	FALSE	0.045592	0.897047	315243	DLBCL	TRUE	reported	0.00234772	5e-15	472174	TL	TRUE	reported	textfile	2	TRUE	0.000129694	61.2456
rs10768683	G	C	G	C	0.0469922	0.0172211	0.841033	0.795712	FALSE	TRUE	FALSE	0.0546712	0.752766	315243	DLBCL	TRUE	reported	0.00277015	1.5e-64	472174	TL	TRUE	reported	textfile	2	TRUE	0.000609086	287.768
rs10773176	G	A	G	A	-0.0172009	-0.0824397	0.741214	0.796237	FALSE	FALSE	FALSE	0.0560817	0.141564	315243	DLBCL	TRUE	reported	0.00228534	5.2e-14	472174	TL	TRUE	reported	textfile	2	TRUE	0.000119963	56.6499
rs10774624	A	G	A	G	0.0149944	0.082167	0.53276	0.61738	FALSE	FALSE	FALSE	0.0449662	0.0676535	315243	DLBCL	TRUE	reported	0.00205494	2.9e-13	472174	TL	TRUE	reported	textfile	2	TRUE	0.000112748	53.2425
rs10805346	C	T	C	T	0.0117072	-0.0245985	0.439339	0.445922	FALSE	FALSE	FALSE	0.0443885	0.579467	315243	DLBCL	TRUE	reported	0.00202147	7e-09	472174	TL	TRUE	reported	textfile	2	TRUE	7.10295e-05	33.5405
rs10840270	G	C	G	C	0.014383	0.00786483	0.655684	0.667216	FALSE	TRUE	FALSE	0.0469784	0.867045	315243	DLBCL	TRUE	reported	0.00212494	1.3e-11	472174	TL	TRUE	reported	textfile	2	TRUE	9.702e-05	45.8146
rs10845387	A	G	A	G	-0.0141214	0.0501007	0.352666	0.354295	FALSE	FALSE	FALSE	0.0473944	0.290464	315243	DLBCL	TRUE	reported	0.00209396	1.5e-11	472174	TL	TRUE	reported	textfile	2	TRUE	9.63108e-05	45.4796
rs10905255	T	G	T	G	-0.0182493	-0.0190938	0.57919	0.554299	FALSE	FALSE	FALSE	0.0445576	0.668273	315243	DLBCL	TRUE	reported	0.00203099	2.6e-19	472174	TL	TRUE	reported	textfile	2	TRUE	0.000170962	80.7374
rs10936598	C	A	C	A	-0.0656433	-0.0232917	0.32379	0.343472	FALSE	FALSE	FALSE	0.0461666	0.613899	315243	DLBCL	TRUE	reported	0.00214663	1e-200	472174	TL	TRUE	reported	textfile	2	TRUE	0.00197654	935.114
rs11085072	T	C	T	C	-0.0131806	0.00172546	0.236909	0.162676	FALSE	FALSE	FALSE	0.0601224	0.977104	315243	DLBCL	TRUE	reported	0.00236713	2.6e-08	472174	TL	TRUE	reported	textfile	2	TRUE	6.56592e-05	31.0045
rs11117354	C	T	C	T	0.0232506	-0.0113636	0.696513	0.575653	FALSE	FALSE	FALSE	0.0445907	0.798845	315243	DLBCL	TRUE	reported	0.00219601	3.4e-26	472174	TL	TRUE	reported	textfile	2	TRUE	0.000237353	112.098
rs111527438	C	T	C	T	0.0125	-0.00396207	0.351251	0.321838	FALSE	FALSE	FALSE	0.0472081	0.933114	315243	DLBCL	TRUE	reported	0.00211016	3.1e-09	472174	TL	TRUE	reported	textfile	2	TRUE	7.43113e-05	35.0903
rs111950327	C	G	C	G	0.0238271	0.15069	0.063628	0.0594902	FALSE	TRUE	FALSE	0.098998	0.127972	315243	DLBCL	TRUE	reported	0.00409406	5.9e-09	472174	TL	TRUE	reported	textfile	2	TRUE	7.173e-05	33.8713
rs112394943	C	T	C	T	-0.0198961	-0.010046	0.162741	0.233311	FALSE	FALSE	FALSE	0.0529017	0.849388	315243	DLBCL	TRUE	reported	0.00281641	1.6e-12	472174	TL	TRUE	reported	textfile	2	TRUE	0.000105681	49.9048
rs113525195	A	C	A	C	-0.0124075	0.0166309	0.290254	0.305049	FALSE	FALSE	FALSE	0.0480623	0.729321	315243	DLBCL	TRUE	reported	0.00224132	3.1e-08	472174	TL	TRUE	reported	textfile	2	TRUE	6.48979e-05	30.645
rs11557154	T	C	T	C	-0.0343719	-0.019327	0.13003	0.128648	FALSE	FALSE	FALSE	0.0652523	0.767086	315243	DLBCL	TRUE	reported	0.00298538	1.1e-30	472174	TL	TRUE	reported	textfile	2	TRUE	0.000280662	132.558
rs11579626	C	A	C	A	0.0265113	0.0429472	0.084882	0.124685	FALSE	FALSE	FALSE	0.0677872	0.526369	315243	DLBCL	TRUE	reported	0.00357752	1.3e-13	472174	TL	TRUE	reported	textfile	2	TRUE	0.000116291	54.9156
rs11584821	T	C	T	C	-0.0306517	-0.00233211	0.176208	0.179542	FALSE	FALSE	FALSE	0.0574892	0.967642	315243	DLBCL	TRUE	reported	0.00263623	3e-31	472174	TL	TRUE	reported	textfile	2	TRUE	0.000286231	135.189
rs116863223	A	G	A	G	-0.0817874	-0.285813	0.011763	0.0111765	FALSE	FALSE	FALSE	0.178923	0.110174	315243	DLBCL	TRUE	reported	0.00937157	2.6e-18	472174	TL	TRUE	reported	textfile	2	TRUE	0.000161278	76.1634
rs11699829	A	G	A	G	0.0641957	0.196125	0.034146	0.0183604	FALSE	FALSE	FALSE	0.1824	0.282266	315243	DLBCL	TRUE	reported	0.00602028	1.5e-26	472174	TL	TRUE	reported	textfile	2	TRUE	0.000240753	113.704
rs117034449	A	G	A	G	0.0374377	0.299156	0.023304	0.0204762	FALSE	FALSE	FALSE	0.177487	0.0918904	315243	DLBCL	TRUE	reported	0.00667898	2.1e-08	472174	TL	TRUE	reported	textfile	2	TRUE	6.65376e-05	31.4193
rs117407747	T	C	T	C	0.0450533	0.04727	0.027571	0.0109374	FALSE	FALSE	FALSE	0.219048	0.829146	315243	DLBCL	TRUE	reported	0.00611706	1.8e-13	472174	TL	TRUE	reported	textfile	2	TRUE	0.000114872	54.2458
rs11746381	C	T	C	T	0.0329955	0.0933321	0.0568	0.0773557	FALSE	FALSE	FALSE	0.0854191	0.274554	315243	DLBCL	TRUE	reported	0.00431036	1.9e-14	472174	TL	TRUE	reported	textfile	2	TRUE	0.000124087	58.5977
rs117512405	A	G	A	G	-0.0790134	0.052452	0.017043	0.056071	FALSE	FALSE	FALSE	0.0989878	0.596193	315243	DLBCL	TRUE	reported	0.00824611	9.5e-22	472174	TL	TRUE	reported	textfile	2	TRUE	0.000194409	91.8124
rs117630647	A	G	A	G	0.059565	-0.0964292	0.021346	0.0147694	FALSE	FALSE	FALSE	0.17464	0.580839	315243	DLBCL	TRUE	reported	0.00720413	1.4e-16	472174	TL	TRUE	reported	textfile	2	TRUE	0.000144762	68.3624
rs11769630	A	T	A	T	-0.0256807	-0.0937569	0.072227	0.0951615	FALSE	TRUE	FALSE	0.0723993	0.195321	315243	DLBCL	TRUE	reported	0.00389475	4.3e-11	472174	TL	TRUE	reported	textfile	2	TRUE	9.20688e-05	43.4763
rs11991877	A	T	A	T	-0.030138	-0.0652175	0.889309	0.852218	FALSE	TRUE	FALSE	0.0634096	0.303709	315243	DLBCL	TRUE	reported	0.00318686	3.2e-21	472174	TL	TRUE	reported	textfile	2	TRUE	0.000189373	89.4337
rs12369950	C	T	C	T	-0.0178308	-0.117182	0.140675	0.135287	FALSE	FALSE	FALSE	0.0618566	0.0581701	315243	DLBCL	TRUE	reported	0.00290205	8e-10	472174	TL	TRUE	reported	textfile	2	TRUE	7.99457e-05	37.7511
rs12412214	A	G	A	G	-0.0245174	-0.00181939	0.279765	0.391339	FALSE	FALSE	FALSE	0.0449573	0.967719	315243	DLBCL	TRUE	reported	0.00222685	3.4e-28	472174	TL	TRUE	reported	textfile	2	TRUE	0.000256657	121.217
rs12451892	C	T	C	T	-0.0116145	0.00605758	0.380511	0.432349	FALSE	FALSE	FALSE	0.0446041	0.891973	315243	DLBCL	TRUE	reported	0.00207578	2.2e-08	472174	TL	TRUE	reported	textfile	2	TRUE	6.62991e-05	31.3066
rs1291143	C	A	C	A	0.0493145	0.0109405	0.849026	0.78	FALSE	FALSE	FALSE	0.0530577	0.836635	315243	DLBCL	TRUE	reported	0.0027991	1.8e-69	472174	TL	TRUE	reported	textfile	2	TRUE	0.000656939	310.392
rs12925933	C	A	C	A	-0.0146622	0.0173157	0.66221	0.547787	FALSE	FALSE	FALSE	0.0444275	0.696721	315243	DLBCL	TRUE	reported	0.00213796	7e-12	472174	TL	TRUE	reported	textfile	2	TRUE	9.95987e-05	47.0324
rs12932179	G	A	G	A	-0.0136257	0.06872	0.561399	0.63175	FALSE	FALSE	FALSE	0.045198	0.128405	315243	DLBCL	TRUE	reported	0.0020276	1.8e-11	472174	TL	TRUE	reported	textfile	2	TRUE	9.56334e-05	45.1597
rs13062095	C	T	C	T	0.0138552	-0.0535228	0.327843	0.360758	FALSE	FALSE	FALSE	0.0455546	0.240029	315243	DLBCL	TRUE	reported	0.00214113	9.7e-11	472174	TL	TRUE	reported	textfile	2	TRUE	8.86745e-05	41.8733
rs131797	T	TAAAAA	T	TAAAAA	0.0243752	0.0780147	0.235625	0.194581	FALSE	FALSE	FALSE	0.0569252	0.170538	315243	DLBCL	TRUE	reported	0.00236561	6.8e-25	472174	TL	TRUE	reported	textfile	2	TRUE	0.000224807	106.172
rs13230646	C	T	C	T	-0.0173277	-0.00985282	0.248945	0.172958	FALSE	FALSE	FALSE	0.0581154	0.865373	315243	DLBCL	TRUE	reported	0.00232377	8.9e-14	472174	TL	TRUE	reported	textfile	2	TRUE	0.000117745	55.6024
rs1332941	G	A	G	A	0.0256552	0.00583343	0.820466	0.794295	FALSE	FALSE	FALSE	0.0543017	0.914451	315243	DLBCL	TRUE	reported	0.00273159	5.9e-21	472174	TL	TRUE	reported	textfile	2	TRUE	0.000186783	88.21
rs137901416	A	G	A	G	0.04572	-0.0263138	0.100311	0.0644295	FALSE	FALSE	FALSE	0.0888664	0.767149	315243	DLBCL	TRUE	reported	0.00332355	4.7e-43	472174	TL	TRUE	reported	textfile	2	TRUE	0.000400619	189.237
rs139669835	T	C	T	C	-0.0612563	0.196647	0.009365	0.00142857	FALSE	FALSE	FALSE	0.641982	0.759367	315243	DLBCL	TRUE	reported	0.0105346	6.1e-09	472174	TL	TRUE	reported	textfile	2	TRUE	7.16032e-05	33.8114
rs139795227	C	A	C	A	0.0599379	0.264559	0.014021	0.033535	FALSE	FALSE	FALSE	0.137031	0.0535254	315243	DLBCL	TRUE	reported	0.00873247	6.7e-12	472174	TL	TRUE	reported	textfile	2	TRUE	9.97662e-05	47.1115
rs141214782	TTATC	T	TTATC	T	-0.0246687	-0.0480023	0.101206	0.10222	FALSE	FALSE	FALSE	0.0711587	0.499942	315243	DLBCL	TRUE	reported	0.00335723	2e-13	472174	TL	TRUE	reported	textfile	2	TRUE	0.000114335	53.9919
rs142426306	T	C	T	C	-0.0504903	-0.203447	0.039544	0.0342951	FALSE	FALSE	FALSE	0.111015	0.0668621	315243	DLBCL	TRUE	reported	0.00539933	8.7e-21	472174	TL	TRUE	reported	textfile	2	TRUE	0.000185163	87.4449
rs143190905	T	G	T	G	-0.0723995	-0.0796555	0.080404	0.0718525	FALSE	FALSE	FALSE	0.0824437	0.333954	315243	DLBCL	TRUE	reported	0.00369421	1.6e-85	472174	TL	TRUE	reported	textfile	2	TRUE	0.00081278	384.084
rs144204502	T	C	T	C	-0.100574	-0.0152009	0.012562	0.0366611	FALSE	FALSE	FALSE	0.116574	0.896252	315243	DLBCL	TRUE	reported	0.00913369	3.4e-28	472174	TL	TRUE	reported	textfile	2	TRUE	0.000256723	121.249
rs145114957	G	C	G	C	0.0272605	-0.0300637	0.042648	0.0385658	FALSE	TRUE	FALSE	0.112366	0.789044	315243	DLBCL	TRUE	reported	0.00498872	4.6e-08	472174	TL	TRUE	reported	textfile	2	TRUE	6.32353e-05	29.8598
rs150150565	T	C	T	C	0.063762	0.0728546	0.021455	0.0194678	FALSE	FALSE	FALSE	0.165155	0.659121	315243	DLBCL	TRUE	reported	0.00739877	6.8e-18	472174	TL	TRUE	reported	textfile	2	TRUE	0.000157266	74.2682
rs16978028	T	A	T	A	-0.029945	-0.0121672	0.143727	0.0819477	FALSE	TRUE	FALSE	0.0797414	0.878727	315243	DLBCL	TRUE	reported	0.00285068	8.2e-26	472174	TL	TRUE	reported	textfile	2	TRUE	0.000233641	110.344
rs17445108	A	G	A	G	-0.0168922	-0.0492294	0.12695	0.120437	FALSE	FALSE	FALSE	0.0672277	0.463999	315243	DLBCL	TRUE	reported	0.00300983	2e-08	472174	TL	TRUE	reported	textfile	2	TRUE	6.67049e-05	31.4983
rs17677991	G	C	G	C	0.0222664	0.00922528	0.342123	0.396405	FALSE	TRUE	FALSE	0.0449153	0.837265	315243	DLBCL	TRUE	reported	0.00210806	4.4e-26	472174	TL	TRUE	reported	textfile	2	TRUE	0.000236227	111.566
rs182059586	C	T	C	T	-0.0571159	0.262517	0.02511	0.00876751	FALSE	FALSE	FALSE	0.264746	0.321402	315243	DLBCL	TRUE	reported	0.00680853	4.9e-17	472174	TL	TRUE	reported	textfile	2	TRUE	0.000149019	70.3729
rs185174247	A	G	A	G	0.0372806	0.0420863	0.05609	0.0322745	FALSE	FALSE	FALSE	0.12709	0.740529	315243	DLBCL	TRUE	reported	0.00435145	1.1e-17	472174	TL	TRUE	reported	textfile	2	TRUE	0.000155428	73.4
rs188918174	T	C	T	C	0.0403062	-0.0109181	0.036106	0.0457759	FALSE	FALSE	FALSE	0.10561	0.91766	315243	DLBCL	TRUE	reported	0.00543604	1.2e-13	472174	TL	TRUE	reported	textfile	2	TRUE	0.00011642	54.9764
rs1907702	A	G	A	G	0.0150247	-0.0440365	0.766771	0.794775	FALSE	FALSE	FALSE	0.055155	0.42463	315243	DLBCL	TRUE	reported	0.00242651	5.9e-10	472174	TL	TRUE	reported	textfile	2	TRUE	8.11914e-05	38.3394
rs1957937	T	A	T	A	0.0209365	-0.0422319	0.16018	0.178945	FALSE	TRUE	FALSE	0.0566229	0.455761	315243	DLBCL	TRUE	reported	0.00273361	1.9e-14	472174	TL	TRUE	reported	textfile	2	TRUE	0.000124216	58.6588
rs1985369	G	A	G	A	-0.0311893	-0.031851	0.868178	0.887897	FALSE	FALSE	FALSE	0.0710113	0.653767	315243	DLBCL	TRUE	reported	0.00300952	3.6e-25	472174	TL	TRUE	reported	textfile	2	TRUE	0.000227413	107.403
rs201009932	T	TA	T	TA	0.0769296	-0.0599941	0.991068	0.975888	FALSE	FALSE	FALSE	0.149373	0.687949	315243	DLBCL	TRUE	reported	0.0116209	3.6e-11	472174	TL	TRUE	reported	textfile	2	TRUE	9.28036e-05	43.8234
rs2056726	A	G	A	G	-0.0228078	-0.0113575	0.214376	0.225718	FALSE	FALSE	FALSE	0.0526537	0.82922	315243	DLBCL	TRUE	reported	0.00243638	7.9e-21	472174	TL	TRUE	reported	textfile	2	TRUE	0.000185564	87.6345
rs2230590	C	T	C	T	-0.0158022	-0.0338893	0.510897	0.388571	FALSE	FALSE	FALSE	0.0450381	0.451776	315243	DLBCL	TRUE	reported	0.00200806	3.6e-15	472174	TL	TRUE	reported	textfile	2	TRUE	0.000131136	61.927
rs2282764	G	A	G	A	-0.0224234	0.0529437	0.142384	0.147313	FALSE	FALSE	FALSE	0.0631974	0.402171	315243	DLBCL	TRUE	reported	0.00289392	9.3e-15	472174	TL	TRUE	reported	textfile	2	TRUE	0.000127137	60.0383
rs2293579	A	G	A	G	-0.012915	-0.0221412	0.386274	0.291862	FALSE	FALSE	FALSE	0.0481764	0.645812	315243	DLBCL	TRUE	reported	0.00205481	3.3e-10	472174	TL	TRUE	reported	textfile	2	TRUE	8.36579e-05	39.5042
rs2538745	C	T	C	T	-0.012942	0.0374529	0.602841	0.539587	FALSE	FALSE	FALSE	0.0440242	0.394917	315243	DLBCL	TRUE	reported	0.002056	3.1e-10	472174	TL	TRUE	reported	textfile	2	TRUE	8.39108e-05	39.6237
rs2555104	C	A	C	A	-0.0139717	-0.0258442	0.434255	0.475229	FALSE	FALSE	FALSE	0.0439489	0.556499	315243	DLBCL	TRUE	reported	0.00203498	6.6e-12	472174	TL	TRUE	reported	textfile	2	TRUE	9.98235e-05	47.1386
rs2763979	T	C	T	C	-0.0277713	0.151683	0.359721	0.475714	FALSE	FALSE	FALSE	0.0435005	0.000488619	315243	DLBCL	TRUE	reported	0.00208092	1.3e-40	472174	TL	TRUE	reported	textfile	2	TRUE	0.000377065	178.107
rs28502153	A	C	A	C	-0.0215916	0.0549822	0.377958	0.385324	FALSE	FALSE	FALSE	0.0454549	0.226432	315243	DLBCL	TRUE	reported	0.00206208	1.2e-25	472174	TL	TRUE	reported	textfile	2	TRUE	0.000232143	109.637
rs28577594	C	G	C	G	0.0187657	0.0585821	0.709829	0.721563	FALSE	TRUE	FALSE	0.0486346	0.228382	315243	DLBCL	TRUE	reported	0.00224024	5.4e-17	472174	TL	TRUE	reported	textfile	2	TRUE	0.000148585	70.1679
rs2967355	C	A	C	A	-0.0461595	-0.0264721	0.774276	0.820952	FALSE	FALSE	FALSE	0.0580804	0.648545	315243	DLBCL	TRUE	reported	0.00238972	4e-83	472174	TL	TRUE	reported	textfile	2	TRUE	0.000789556	373.101
rs2977608	C	A	C	A	0.0129483	-0.0791808	0.743949	0.675292	FALSE	FALSE	FALSE	0.0478142	0.0977192	315243	DLBCL	TRUE	reported	0.00233716	3e-08	472174	TL	TRUE	reported	textfile	2	TRUE	6.50007e-05	30.6935
rs3093888	A	G	A	G	-0.028973	0.0285257	0.05131	0.0906387	FALSE	FALSE	FALSE	0.0774426	0.712615	315243	DLBCL	TRUE	reported	0.00452459	1.5e-10	472174	TL	TRUE	reported	textfile	2	TRUE	8.68338e-05	41.004
rs35640778	A	G	A	G	-0.209011	-0.123826	0.020757	0.0110345	FALSE	FALSE	FALSE	0.199377	0.534558	315243	DLBCL	TRUE	reported	0.00702087	9.59e-195	472174	TL	TRUE	reported	textfile	2	TRUE	0.00187344	886.247
rs3767952	A	G	A	G	0.0134472	-0.000870343	0.226709	0.221339	FALSE	FALSE	FALSE	0.0529728	0.986891	315243	DLBCL	TRUE	reported	0.00238826	1.8e-08	472174	TL	TRUE	reported	textfile	2	TRUE	6.71381e-05	31.7029
rs3785074	G	A	G	A	0.023863	-0.0342517	0.289672	0.203819	FALSE	FALSE	FALSE	0.0541327	0.526906	315243	DLBCL	TRUE	reported	0.00220455	2.6e-27	472174	TL	TRUE	reported	textfile	2	TRUE	0.000248085	117.168
rs3891167	G	A	G	A	-0.0425685	0.0403645	0.253435	0.261591	FALSE	FALSE	FALSE	0.0509963	0.428641	315243	DLBCL	TRUE	reported	0.00239551	1.2e-70	472174	TL	TRUE	reported	textfile	2	TRUE	0.000668326	315.776
rs41269079	A	T	A	T	0.0153617	0.0971875	0.188991	0.224585	FALSE	TRUE	FALSE	0.0541802	0.0728484	315243	DLBCL	TRUE	reported	0.0025499	1.7e-09	472174	TL	TRUE	reported	textfile	2	TRUE	7.68594e-05	36.2936
rs41304832	A	G	A	G	0.0611702	0.14156	0.012378	0.0424052	FALSE	FALSE	FALSE	0.116303	0.223541	315243	DLBCL	TRUE	reported	0.0093095	5e-11	472174	TL	TRUE	reported	textfile	2	TRUE	9.14293e-05	43.1743
rs429358	C	T	C	T	0.0173498	-0.145622	0.153969	0.157696	FALSE	FALSE	FALSE	0.0577053	0.011618	315243	DLBCL	TRUE	reported	0.00277091	3.8e-10	472174	TL	TRUE	reported	textfile	2	TRUE	8.30244e-05	39.2051
rs4498805	T	G	T	G	0.0150601	-0.0172039	0.546632	0.501429	FALSE	FALSE	FALSE	0.0439245	0.695303	315243	DLBCL	TRUE	reported	0.00200376	5.7e-14	472174	TL	TRUE	reported	textfile	2	TRUE	0.000119622	56.4888
rs4530278	T	G	T	G	0.0138793	0.0588999	0.59815	0.617193	FALSE	FALSE	FALSE	0.0450105	0.190676	315243	DLBCL	TRUE	reported	0.0020567	1.5e-11	472174	TL	TRUE	reported	textfile	2	TRUE	9.64382e-05	45.5398
rs45604339	T	C	T	C	-0.020433	0.0333229	0.34242	0.395333	FALSE	FALSE	FALSE	0.0452197	0.461176	315243	DLBCL	TRUE	reported	0.00211433	4.3e-22	472174	TL	TRUE	reported	textfile	2	TRUE	0.000197756	93.3936
rs4695407	G	A	G	A	0.0141511	-0.0825442	0.507843	0.445361	FALSE	FALSE	FALSE	0.044259	0.062177	315243	DLBCL	TRUE	reported	0.00199925	1.5e-12	472174	TL	TRUE	reported	textfile	2	TRUE	0.000106096	50.1008
rs4724	A	G	A	G	-0.0547446	-0.0304151	0.116598	0.105229	FALSE	FALSE	FALSE	0.0710205	0.668464	315243	DLBCL	TRUE	reported	0.00312441	9.8e-69	472174	TL	TRUE	reported	textfile	2	TRUE	0.000649774	307.004
rs4731541	G	C	G	C	-0.0206119	0.0768302	0.624901	0.65611	FALSE	TRUE	FALSE	0.045917	0.0942801	315243	DLBCL	TRUE	reported	0.00205962	1.4e-23	472174	TL	TRUE	reported	textfile	2	TRUE	0.000212064	100.152
rs4743037	T	C	T	C	0.0147971	0.021949	0.230874	0.222947	FALSE	FALSE	FALSE	0.0532649	0.680285	315243	DLBCL	TRUE	reported	0.00238094	5.1e-10	472174	TL	TRUE	reported	textfile	2	TRUE	8.17935e-05	38.6238
rs55747751	A	G	A	G	-0.0211612	-0.0762162	0.077375	0.0519122	FALSE	FALSE	FALSE	0.0960799	0.427628	315243	DLBCL	TRUE	reported	0.00375164	1.7e-08	472174	TL	TRUE	reported	textfile	2	TRUE	6.73763e-05	31.8153
rs56799554	G	A	G	A	-0.0259793	-0.104096	0.170183	0.216919	FALSE	FALSE	FALSE	0.0523922	0.0469386	315243	DLBCL	TRUE	reported	0.00267858	3e-22	472174	TL	TRUE	reported	textfile	2	TRUE	0.000199185	94.0684
rs5742915	C	T	C	T	0.0193377	0.0907939	0.445829	0.430941	FALSE	FALSE	FALSE	0.0448211	0.0427957	315243	DLBCL	TRUE	reported	0.00202886	1.6e-21	472174	TL	TRUE	reported	textfile	2	TRUE	0.000192362	90.8455
rs59409453	G	A	G	A	0.0202133	0.0673212	0.730602	0.805772	FALSE	FALSE	FALSE	0.0546878	0.21832	315243	DLBCL	TRUE	reported	0.00230175	1.6e-18	472174	TL	TRUE	reported	textfile	2	TRUE	0.0001633	77.1181
rs6007020	C	T	C	T	0.0144904	-0.0139786	0.367823	0.351488	FALSE	FALSE	FALSE	0.0460097	0.761267	315243	DLBCL	TRUE	reported	0.00209637	4.8e-12	472174	TL	TRUE	reported	textfile	2	TRUE	0.000101176	47.7775
rs6054257	A	G	A	G	-0.0141684	-0.0198582	0.793522	0.799925	FALSE	FALSE	FALSE	0.0554578	0.720286	315243	DLBCL	TRUE	reported	0.00247729	1.1e-08	472174	TL	TRUE	reported	textfile	2	TRUE	6.92717e-05	32.7104
rs611646	A	T	A	T	-0.0368309	0.0515552	0.408685	0.407888	FALSE	TRUE	FALSE	0.0450494	0.252452	315243	DLBCL	TRUE	reported	0.00203547	3.5e-73	472174	TL	TRUE	reported	textfile	2	TRUE	0.000692934	327.411
rs61748181	T	C	T	C	-0.059181	-0.135905	0.028928	0.0482745	FALSE	FALSE	FALSE	0.0967191	0.159975	315243	DLBCL	TRUE	reported	0.00595394	2.8e-23	472174	TL	TRUE	reported	textfile	2	TRUE	0.000209201	98.7993
rs6536702	A	G	A	G	0.0534148	-0.0295289	0.774647	0.810663	FALSE	FALSE	FALSE	0.0567774	0.603007	315243	DLBCL	TRUE	reported	0.00238875	9.4e-111	472174	TL	TRUE	reported	textfile	2	TRUE	0.00105784	500.011
rs6584579	G	A	G	A	0.0114923	-0.0529948	0.398876	0.316829	FALSE	FALSE	FALSE	0.0470063	0.259574	315243	DLBCL	TRUE	reported	0.00204674	2e-08	472174	TL	TRUE	reported	textfile	2	TRUE	6.67663e-05	31.5273
rs6587577	G	A	G	A	-0.0182148	-0.126401	0.826346	0.825908	FALSE	FALSE	FALSE	0.0603457	0.0362051	315243	DLBCL	TRUE	reported	0.0026359	4.8e-12	472174	TL	TRUE	reported	textfile	2	TRUE	0.000101122	47.7517
rs6659669	T	C	T	C	-0.0117091	-0.0406996	0.605095	0.574631	FALSE	FALSE	FALSE	0.0445884	0.361356	315243	DLBCL	TRUE	reported	0.00205167	1.1e-08	472174	TL	TRUE	reported	textfile	2	TRUE	6.89763e-05	32.5709
rs6669563	A	G	A	G	0.0182358	0.0388343	0.437768	0.481315	FALSE	FALSE	FALSE	0.0441083	0.378626	315243	DLBCL	TRUE	reported	0.00202476	2.1e-19	472174	TL	TRUE	reported	textfile	2	TRUE	0.000171762	81.1149
rs66731853	A	G	A	G	-0.0177791	-0.0388532	0.317304	0.187589	FALSE	FALSE	FALSE	0.0557159	0.485587	315243	DLBCL	TRUE	reported	0.00215421	1.5e-16	472174	TL	TRUE	reported	textfile	2	TRUE	0.000144238	68.1148
rs6751209	C	T	C	T	-0.0140465	-0.0475096	0.204231	0.173668	FALSE	FALSE	FALSE	0.0573215	0.407203	315243	DLBCL	TRUE	reported	0.00248465	1.6e-08	472174	TL	TRUE	reported	textfile	2	TRUE	6.76822e-05	31.9598
rs6776756	A	G	A	G	-0.0174439	-0.0580701	0.597562	0.520471	FALSE	FALSE	FALSE	0.0445232	0.192143	315243	DLBCL	TRUE	reported	0.00203747	1.1e-17	472174	TL	TRUE	reported	textfile	2	TRUE	0.000155216	73.2998
rs6881568	A	C	A	C	0.0169256	0.00498358	0.36258	0.272204	FALSE	FALSE	FALSE	0.0495179	0.919835	315243	DLBCL	TRUE	reported	0.00207735	3.7e-16	472174	TL	TRUE	reported	textfile	2	TRUE	0.000140574	66.3845
rs7099229	A	G	A	G	-0.0153288	-0.00519847	0.273301	0.179559	FALSE	FALSE	FALSE	0.0576338	0.92813	315243	DLBCL	TRUE	reported	0.00224403	8.4e-12	472174	TL	TRUE	reported	textfile	2	TRUE	9.8813e-05	46.6613
rs7164950	G	A	G	A	0.0129362	0.0657173	0.405979	0.438176	FALSE	FALSE	FALSE	0.044776	0.142189	315243	DLBCL	TRUE	reported	0.00204001	2.3e-10	472174	TL	TRUE	reported	textfile	2	TRUE	8.51549e-05	40.2112
rs7209057	A	G	A	G	0.011819	0.00914546	0.561044	0.554252	FALSE	FALSE	FALSE	0.0443705	0.8367	315243	DLBCL	TRUE	reported	0.00202865	5.7e-09	472174	TL	TRUE	reported	textfile	2	TRUE	7.1881e-05	33.9426
rs7221585	T	C	T	C	0.0143271	0.00136056	0.22401	0.283147	FALSE	FALSE	FALSE	0.0488872	0.977797	315243	DLBCL	TRUE	reported	0.00247042	6.7e-09	472174	TL	TRUE	reported	textfile	2	TRUE	7.12266e-05	33.6336
rs73581419	T	C	T	C	0.0229838	-0.00181255	0.106605	0.08231	FALSE	FALSE	FALSE	0.0801356	0.981955	315243	DLBCL	TRUE	reported	0.00324156	1.3e-12	472174	TL	TRUE	reported	textfile	2	TRUE	0.00010646	50.2729
rs75664430	G	C	G	C	-0.0235179	0.0736731	0.248028	0.203815	FALSE	TRUE	FALSE	0.0557763	0.186545	315243	DLBCL	TRUE	reported	0.0023186	3.6e-24	472174	TL	TRUE	reported	textfile	2	TRUE	0.000217846	102.883
rs76065543	T	C	T	C	0.0342843	-0.0129885	0.137527	0.182458	FALSE	FALSE	FALSE	0.0566616	0.818691	315243	DLBCL	TRUE	reported	0.00290708	4.2e-32	472174	TL	TRUE	reported	textfile	2	TRUE	0.000294474	139.083
rs76094497	A	G	A	G	0.0278689	0.140342	0.051569	0.0284762	FALSE	FALSE	FALSE	0.140473	0.317763	315243	DLBCL	TRUE	reported	0.00461731	1.6e-09	472174	TL	TRUE	reported	textfile	2	TRUE	7.71482e-05	36.43
rs76219171	A	G	A	G	0.0359839	0.0907925	0.058433	0.0383193	FALSE	FALSE	FALSE	0.119318	0.4467	315243	DLBCL	TRUE	reported	0.00431741	7.8e-17	472174	TL	TRUE	reported	textfile	2	TRUE	0.000147097	69.4653
rs762679	A	T	A	T	0.0310104	-0.054638	0.856501	0.821612	FALSE	TRUE	FALSE	0.0585806	0.350976	315243	DLBCL	TRUE	reported	0.00285024	1.4e-27	472174	TL	TRUE	reported	textfile	2	TRUE	0.000250635	118.372
rs76666449	C	T	C	T	0.0295125	0.0524198	0.100625	0.14412	FALSE	FALSE	FALSE	0.063592	0.40976	315243	DLBCL	TRUE	reported	0.00333186	8.2e-19	472174	TL	TRUE	reported	textfile	2	TRUE	0.000166136	78.4579
rs77231040	C	G	C	G	0.0989303	0.274313	0.005742	0.0324071	FALSE	TRUE	FALSE	0.13923	0.0488124	315243	DLBCL	TRUE	reported	0.0134649	2e-13	472174	TL	TRUE	reported	textfile	2	TRUE	0.000114314	53.9822
rs7726159	A	C	A	C	0.0707719	-0.0562363	0.327295	0.314749	FALSE	FALSE	FALSE	0.0470135	0.23163	315243	DLBCL	TRUE	reported	0.0021282	1e-200	472174	TL	TRUE	reported	textfile	2	TRUE	0.00233657	1105.85
rs7772289	T	G	T	G	0.017549	-0.0128428	0.503081	0.618028	FALSE	FALSE	FALSE	0.0453761	0.777154	315243	DLBCL	TRUE	reported	0.00200003	1.7e-18	472174	TL	TRUE	reported	textfile	2	TRUE	0.000163027	76.9892
rs77732866	A	G	A	G	0.0177942	-0.0113475	0.137597	0.140332	FALSE	FALSE	FALSE	0.0631147	0.857316	315243	DLBCL	TRUE	reported	0.00290595	9.2e-10	472174	TL	TRUE	reported	textfile	2	TRUE	7.94043e-05	37.4955
rs7790856	T	C	T	C	-0.0437199	-0.0540643	0.289139	0.215165	FALSE	FALSE	FALSE	0.0528318	0.306153	315243	DLBCL	TRUE	reported	0.00220526	1.8e-87	472174	TL	TRUE	reported	textfile	2	TRUE	0.000831716	393.04
rs78491606	C	A	C	A	-0.0756311	-0.0540572	0.018433	0.0276732	FALSE	FALSE	FALSE	0.131519	0.681056	315243	DLBCL	TRUE	reported	0.00741168	1.9e-24	472174	TL	TRUE	reported	textfile	2	TRUE	0.00022048	104.128
rs79977579	A	C	A	C	0.0281517	-0.131355	0.09555	0.0854472	FALSE	FALSE	FALSE	0.0750084	0.0799116	315243	DLBCL	TRUE	reported	0.00343182	2.3e-16	472174	TL	TRUE	reported	textfile	2	TRUE	0.000142494	67.2912
rs80116508	A	G	A	G	-0.0352672	-0.0970972	0.062356	0.071423	FALSE	FALSE	FALSE	0.0818259	0.235373	315243	DLBCL	TRUE	reported	0.00415151	2e-17	472174	TL	TRUE	reported	textfile	2	TRUE	0.000152813	72.1652
rs80324517	A	G	A	G	0.0396515	0.0720081	0.048259	0.0663716	FALSE	FALSE	FALSE	0.0912684	0.430129	315243	DLBCL	TRUE	reported	0.00466286	1.8e-17	472174	TL	TRUE	reported	textfile	2	TRUE	0.000153125	72.3124
rs8102497	A	G	A	G	-0.0149654	-0.0536963	0.431828	0.437979	FALSE	FALSE	FALSE	0.0442172	0.224604	315243	DLBCL	TRUE	reported	0.0020233	1.4e-13	472174	TL	TRUE	reported	textfile	2	TRUE	0.000115852	54.7084
rs8105767	G	A	G	A	0.0328384	-0.0324546	0.29467	0.309746	FALSE	FALSE	FALSE	0.0472856	0.492492	315243	DLBCL	TRUE	reported	0.00220117	2.5e-50	472174	TL	TRUE	reported	textfile	2	TRUE	0.00047114	222.564
rs869785	C	T	C	T	-0.0147303	0.0942585	0.672471	0.683352	FALSE	FALSE	FALSE	0.0466102	0.0431479	315243	DLBCL	TRUE	reported	0.00212801	4.4e-12	472174	TL	TRUE	reported	textfile	2	TRUE	0.000101468	47.9153
rs871134	T	C	T	C	-0.0182986	0.0429585	0.569032	0.564312	FALSE	FALSE	FALSE	0.0442478	0.331616	315243	DLBCL	TRUE	reported	0.0020263	1.7e-19	472174	TL	TRUE	reported	textfile	2	TRUE	0.000172684	81.5505
rs932002	T	C	T	C	-0.0402052	-0.00523624	0.150843	0.235296	FALSE	FALSE	FALSE	0.0518333	0.919534	315243	DLBCL	TRUE	reported	0.00279667	7.3e-47	472174	TL	TRUE	reported	textfile	2	TRUE	0.000437512	206.671
rs9398196	G	A	G	A	-0.0143586	0.0162632	0.52005	0.623978	FALSE	FALSE	FALSE	0.0455445	0.721029	315243	DLBCL	TRUE	reported	0.00201175	9.5e-13	472174	TL	TRUE	reported	textfile	2	TRUE	0.000107877	50.9418
rs939916	A	G	A	G	0.0241795	-0.0137744	0.669967	0.730071	FALSE	FALSE	FALSE	0.0498203	0.782177	315243	DLBCL	TRUE	reported	0.00216724	6.6e-29	472174	TL	TRUE	reported	textfile	2	TRUE	0.000263551	124.474
rs9419958	C	T	C	T	-0.0810098	0.014441	0.86139	0.885651	FALSE	FALSE	FALSE	0.0690515	0.834344	315243	DLBCL	TRUE	reported	0.00293847	2.6e-167	472174	TL	TRUE	reported	textfile	2	TRUE	0.00160706	760.03
rs9600019	T	C	T	C	0.0127134	-0.0426132	0.335579	0.364459	FALSE	FALSE	FALSE	0.0456372	0.350439	315243	DLBCL	TRUE	reported	0.00213096	2.4e-09	472174	TL	TRUE	reported	textfile	2	TRUE	7.53769e-05	35.5935
rs9878436	T	C	T	C	-0.0143407	-0.0529304	0.434393	0.338687	FALSE	FALSE	FALSE	0.0461134	0.251038	315243	DLBCL	TRUE	reported	0.00201819	1.2e-12	472174	TL	TRUE	reported	textfile	2	TRUE	0.000106922	50.4911
rs9955360	A	C	A	C	-0.0190311	0.0728025	0.869288	0.86468	FALSE	FALSE	FALSE	0.0629585	0.247535	315243	DLBCL	TRUE	reported	0.00299791	2.2e-10	472174	TL	TRUE	reported	textfile	2	TRUE	8.53398e-05	40.2985

## Sheet: mantle cell lymphoma
SNP	effect_allele.exposure	other_allele.exposure	effect_allele.outcome	other_allele.outcome	beta.exposure	beta.outcome	eaf.exposure	eaf.outcome	remove	palindromic	ambiguous	se.outcome	pval.outcome	samplesize.outcome	outcome	mr_keep.outcome	pval_origin.outcome	se.exposure	pval.exposure	samplesize.exposure	exposure	mr_keep.exposure	pval_origin.exposure	data_source.exposure	action	mr_keep	R2	F
rs1003322	A	C	A	C	0.0141734	0.0697242	0.213742	0.151746	FALSE	FALSE	FALSE	0.140639	0.620058	314403	MANTLE	TRUE	reported	0.00247546	1e-08	472174	TL	TRUE	reported	textfile	2	TRUE	6.94231e-05	32.7819
rs10112752	A	G	A	G	-0.0287522	-0.195362	0.430369	0.398637	FALSE	FALSE	FALSE	0.0992539	0.0490332	314403	MANTLE	TRUE	reported	0.00202518	9.5e-46	472174	TL	TRUE	reported	textfile	2	TRUE	0.000426705	201.564
rs1023767	A	G	A	G	-0.0183732	-0.00491514	0.237595	0.372717	FALSE	FALSE	FALSE	0.101419	0.961347	314403	MANTLE	TRUE	reported	0.00234772	5e-15	472174	TL	TRUE	reported	textfile	2	TRUE	0.000129694	61.2456
rs10768683	G	C	G	C	0.0469922	-0.104443	0.841033	0.775238	FALSE	TRUE	FALSE	0.121057	0.38827	314403	MANTLE	TRUE	reported	0.00277015	1.5e-64	472174	TL	TRUE	reported	textfile	2	TRUE	0.000609086	287.768
rs10773176	G	A	G	A	-0.0172009	-0.113514	0.741214	0.794472	FALSE	FALSE	FALSE	0.125313	0.36502	314403	MANTLE	TRUE	reported	0.00228534	5.2e-14	472174	TL	TRUE	reported	textfile	2	TRUE	0.000119963	56.6499
rs10774624	A	G	A	G	0.0149944	0.130936	0.53276	0.630654	FALSE	FALSE	FALSE	0.100186	0.191237	314403	MANTLE	TRUE	reported	0.00205494	2.9e-13	472174	TL	TRUE	reported	textfile	2	TRUE	0.000112748	53.2425
rs10805346	C	T	C	T	0.0117072	-0.154248	0.439339	0.412885	FALSE	FALSE	FALSE	0.098785	0.118417	314403	MANTLE	TRUE	reported	0.00202147	7e-09	472174	TL	TRUE	reported	textfile	2	TRUE	7.10295e-05	33.5405
rs10840270	G	C	G	C	0.014383	0.064519	0.655684	0.679627	FALSE	TRUE	FALSE	0.10409	0.535363	314403	MANTLE	TRUE	reported	0.00212494	1.3e-11	472174	TL	TRUE	reported	textfile	2	TRUE	9.702e-05	45.8146
rs10845387	A	G	A	G	-0.0141214	-0.0672769	0.352666	0.331699	FALSE	FALSE	FALSE	0.105295	0.522862	314403	MANTLE	TRUE	reported	0.00209396	1.5e-11	472174	TL	TRUE	reported	textfile	2	TRUE	9.63108e-05	45.4796
rs10905255	T	G	T	G	-0.0182493	0.0197932	0.57919	0.557778	FALSE	FALSE	FALSE	0.0991859	0.841827	314403	MANTLE	TRUE	reported	0.00203099	2.6e-19	472174	TL	TRUE	reported	textfile	2	TRUE	0.000170962	80.7374
rs10936598	C	A	C	A	-0.0656433	0.102582	0.32379	0.376611	FALSE	FALSE	FALSE	0.102903	0.318823	314403	MANTLE	TRUE	reported	0.00214663	1e-200	472174	TL	TRUE	reported	textfile	2	TRUE	0.00197654	935.114
rs11085072	T	C	T	C	-0.0131806	-0.0270598	0.236909	0.159589	FALSE	FALSE	FALSE	0.133249	0.839075	314403	MANTLE	TRUE	reported	0.00236713	2.6e-08	472174	TL	TRUE	reported	textfile	2	TRUE	6.56592e-05	31.0045
rs11117354	C	T	C	T	0.0232506	0.0216264	0.696513	0.588067	FALSE	FALSE	FALSE	0.0998321	0.828499	314403	MANTLE	TRUE	reported	0.00219601	3.4e-26	472174	TL	TRUE	reported	textfile	2	TRUE	0.000237353	112.098
rs111527438	C	T	C	T	0.0125	-0.0256367	0.351251	0.320915	FALSE	FALSE	FALSE	0.105153	0.807383	314403	MANTLE	TRUE	reported	0.00211016	3.1e-09	472174	TL	TRUE	reported	textfile	2	TRUE	7.43113e-05	35.0903
rs111950327	C	G	C	G	0.0238271	-0.0220925	0.063628	0.05	FALSE	TRUE	FALSE	0.223466	0.921247	314403	MANTLE	TRUE	reported	0.00409406	5.9e-09	472174	TL	TRUE	reported	textfile	2	TRUE	7.173e-05	33.8713
rs112394943	C	T	C	T	-0.0198961	0.00624045	0.162741	0.232017	FALSE	FALSE	FALSE	0.118806	0.958109	314403	MANTLE	TRUE	reported	0.00281641	1.6e-12	472174	TL	TRUE	reported	textfile	2	TRUE	0.000105681	49.9048
rs113525195	A	C	A	C	-0.0124075	-0.119865	0.290254	0.279692	FALSE	FALSE	FALSE	0.106887	0.262109	314403	MANTLE	TRUE	reported	0.00224132	3.1e-08	472174	TL	TRUE	reported	textfile	2	TRUE	6.48979e-05	30.645
rs11557154	T	C	T	C	-0.0343719	0.0483756	0.13003	0.133287	FALSE	FALSE	FALSE	0.147062	0.742197	314403	MANTLE	TRUE	reported	0.00298538	1.1e-30	472174	TL	TRUE	reported	textfile	2	TRUE	0.000280662	132.558
rs11579626	C	A	C	A	0.0265113	-0.236708	0.084882	0.0953315	FALSE	FALSE	FALSE	0.150604	0.116014	314403	MANTLE	TRUE	reported	0.00357752	1.3e-13	472174	TL	TRUE	reported	textfile	2	TRUE	0.000116291	54.9156
rs11584821	T	C	T	C	-0.0306517	0.0987363	0.176208	0.191261	FALSE	FALSE	FALSE	0.129024	0.44412	314403	MANTLE	TRUE	reported	0.00263623	3e-31	472174	TL	TRUE	reported	textfile	2	TRUE	0.000286231	135.189
rs116863223	A	G	A	G	-0.0817874	0.498747	0.011763	0.0231466	FALSE	FALSE	FALSE	0.39693	0.20893	314403	MANTLE	TRUE	reported	0.00937157	2.6e-18	472174	TL	TRUE	reported	textfile	2	TRUE	0.000161278	76.1634
rs11699829	A	G	A	G	0.0641957	-0.587435	0.034146	0.00717087	FALSE	FALSE	FALSE	0.406083	0.148012	314403	MANTLE	TRUE	reported	0.00602028	1.5e-26	472174	TL	TRUE	reported	textfile	2	TRUE	0.000240753	113.704
rs117034449	A	G	A	G	0.0374377	-0.0714261	0.023304	0.0152381	FALSE	FALSE	FALSE	0.390218	0.854765	314403	MANTLE	TRUE	reported	0.00667898	2.1e-08	472174	TL	TRUE	reported	textfile	2	TRUE	6.65376e-05	31.4193
rs117407747	T	C	T	C	0.0450533	-0.0612746	0.027571	0.00957983	FALSE	FALSE	FALSE	0.49856	0.902184	314403	MANTLE	TRUE	reported	0.00611706	1.8e-13	472174	TL	TRUE	reported	textfile	2	TRUE	0.000114872	54.2458
rs11746381	C	T	C	T	0.0329955	-0.179797	0.0568	0.0595238	FALSE	FALSE	FALSE	0.190717	0.345815	314403	MANTLE	TRUE	reported	0.00431036	1.9e-14	472174	TL	TRUE	reported	textfile	2	TRUE	0.000124087	58.5977
rs117512405	A	G	A	G	-0.0790134	-0.0161059	0.017043	0.0554155	FALSE	FALSE	FALSE	0.218276	0.94118	314403	MANTLE	TRUE	reported	0.00824611	9.5e-22	472174	TL	TRUE	reported	textfile	2	TRUE	0.000194409	91.8124
rs117630647	A	G	A	G	0.059565	0.540694	0.021346	0.0238095	FALSE	FALSE	FALSE	0.395865	0.171985	314403	MANTLE	TRUE	reported	0.00720413	1.4e-16	472174	TL	TRUE	reported	textfile	2	TRUE	0.000144762	68.3624
rs11769630	A	T	A	T	-0.0256807	0.309535	0.072227	0.137395	FALSE	TRUE	FALSE	0.15837	0.0506419	314403	MANTLE	TRUE	reported	0.00389475	4.3e-11	472174	TL	TRUE	reported	textfile	2	TRUE	9.20688e-05	43.4763
rs11991877	A	T	A	T	-0.030138	0.103	0.889309	0.871429	FALSE	TRUE	FALSE	0.1421	0.468549	314403	MANTLE	TRUE	reported	0.00318686	3.2e-21	472174	TL	TRUE	reported	textfile	2	TRUE	0.000189373	89.4337
rs12369950	C	T	C	T	-0.0178308	-0.0262929	0.140675	0.142782	FALSE	FALSE	FALSE	0.140316	0.851361	314403	MANTLE	TRUE	reported	0.00290205	8e-10	472174	TL	TRUE	reported	textfile	2	TRUE	7.99457e-05	37.7511
rs12412214	A	G	A	G	-0.0245174	-0.153133	0.279765	0.349935	FALSE	FALSE	FALSE	0.100993	0.129451	314403	MANTLE	TRUE	reported	0.00222685	3.4e-28	472174	TL	TRUE	reported	textfile	2	TRUE	0.000256657	121.217
rs12451892	C	T	C	T	-0.0116145	-0.0188214	0.380511	0.424136	FALSE	FALSE	FALSE	0.0996005	0.850117	314403	MANTLE	TRUE	reported	0.00207578	2.2e-08	472174	TL	TRUE	reported	textfile	2	TRUE	6.62991e-05	31.3066
rs1291143	C	A	C	A	0.0493145	-0.193749	0.849026	0.742857	FALSE	FALSE	FALSE	0.118263	0.101362	314403	MANTLE	TRUE	reported	0.0027991	1.8e-69	472174	TL	TRUE	reported	textfile	2	TRUE	0.000656939	310.392
rs12925933	C	A	C	A	-0.0146622	-0.115324	0.66221	0.516237	FALSE	FALSE	FALSE	0.0990948	0.244516	314403	MANTLE	TRUE	reported	0.00213796	7e-12	472174	TL	TRUE	reported	textfile	2	TRUE	9.95987e-05	47.0324
rs12932179	G	A	G	A	-0.0136257	-0.0188331	0.561399	0.606853	FALSE	FALSE	FALSE	0.100327	0.851098	314403	MANTLE	TRUE	reported	0.0020276	1.8e-11	472174	TL	TRUE	reported	textfile	2	TRUE	9.56334e-05	45.1597
rs13062095	C	T	C	T	0.0138552	0.108617	0.327843	0.402092	FALSE	FALSE	FALSE	0.10127	0.283474	314403	MANTLE	TRUE	reported	0.00214113	9.7e-11	472174	TL	TRUE	reported	textfile	2	TRUE	8.86745e-05	41.8733
rs131797	T	TAAAAA	T	TAAAAA	0.0243752	0.0901926	0.235625	0.199234	FALSE	FALSE	FALSE	0.126428	0.475605	314403	MANTLE	TRUE	reported	0.00236561	6.8e-25	472174	TL	TRUE	reported	textfile	2	TRUE	0.000224807	106.172
rs13230646	C	T	C	T	-0.0173277	0.116043	0.248945	0.196648	FALSE	FALSE	FALSE	0.127509	0.362782	314403	MANTLE	TRUE	reported	0.00232377	8.9e-14	472174	TL	TRUE	reported	textfile	2	TRUE	0.000117745	55.6024
rs1332941	G	A	G	A	0.0256552	-0.0317566	0.820466	0.7855	FALSE	FALSE	FALSE	0.120164	0.791568	314403	MANTLE	TRUE	reported	0.00273159	5.9e-21	472174	TL	TRUE	reported	textfile	2	TRUE	0.000186783	88.21
rs137901416	A	G	A	G	0.04572	-0.37212	0.100311	0.0431933	FALSE	FALSE	FALSE	0.19913	0.0616609	314403	MANTLE	TRUE	reported	0.00332355	4.7e-43	472174	TL	TRUE	reported	textfile	2	TRUE	0.000400619	189.237
rs139669835	T	C	T	C	-0.0612563	-1.05042	0.009365		FALSE	FALSE	FALSE	1.48855	0.480394	314403	MANTLE	TRUE	reported	0.0105346	6.1e-09	472174	TL	TRUE	reported	textfile	2	TRUE	7.16032e-05	33.8114
rs139795227	C	A	C	A	0.0599379	0.37027	0.014021	0.0358077	FALSE	FALSE	FALSE	0.306095	0.226411	314403	MANTLE	TRUE	reported	0.00873247	6.7e-12	472174	TL	TRUE	reported	textfile	2	TRUE	9.97662e-05	47.1115
rs141214782	TTATC	T	TTATC	T	-0.0246687	0.018799	0.101206	0.111905	FALSE	FALSE	FALSE	0.156481	0.904376	314403	MANTLE	TRUE	reported	0.00335723	2e-13	472174	TL	TRUE	reported	textfile	2	TRUE	0.000114335	53.9919
rs142426306	T	C	T	C	-0.0504903	0.0896999	0.039544	0.0467974	FALSE	FALSE	FALSE	0.244814	0.714065	314403	MANTLE	TRUE	reported	0.00539933	8.7e-21	472174	TL	TRUE	reported	textfile	2	TRUE	0.000185163	87.4449
rs143190905	T	G	T	G	-0.0723995	-0.0942267	0.080404	0.0680019	FALSE	FALSE	FALSE	0.186458	0.613313	314403	MANTLE	TRUE	reported	0.00369421	1.6e-85	472174	TL	TRUE	reported	textfile	2	TRUE	0.00081278	384.084
rs144204502	T	C	T	C	-0.100574	-0.100559	0.012562	0.0333333	FALSE	FALSE	FALSE	0.26117	0.700213	314403	MANTLE	TRUE	reported	0.00913369	3.4e-28	472174	TL	TRUE	reported	textfile	2	TRUE	0.000256723	121.249
rs145114957	G	C	G	C	0.0272605	0.317532	0.042648	0.05	FALSE	TRUE	FALSE	0.25517	0.213355	314403	MANTLE	TRUE	reported	0.00498872	4.6e-08	472174	TL	TRUE	reported	textfile	2	TRUE	6.32353e-05	29.8598
rs150150565	T	C	T	C	0.063762	-0.0186835	0.021455	0.0175257	FALSE	FALSE	FALSE	0.372682	0.960017	314403	MANTLE	TRUE	reported	0.00739877	6.8e-18	472174	TL	TRUE	reported	textfile	2	TRUE	0.000157266	74.2682
rs16978028	T	A	T	A	-0.029945	-0.155353	0.143727	0.0719048	FALSE	TRUE	FALSE	0.17646	0.378649	314403	MANTLE	TRUE	reported	0.00285068	8.2e-26	472174	TL	TRUE	reported	textfile	2	TRUE	0.000233641	110.344
rs17445108	A	G	A	G	-0.0168922	-0.0945068	0.12695	0.116461	FALSE	FALSE	FALSE	0.149325	0.526803	314403	MANTLE	TRUE	reported	0.00300983	2e-08	472174	TL	TRUE	reported	textfile	2	TRUE	6.67049e-05	31.4983
rs182059586	C	T	C	T	-0.0571159	-0.256904	0.02511	0.00478992	FALSE	FALSE	FALSE	0.609366	0.673322	314403	MANTLE	TRUE	reported	0.00680853	4.9e-17	472174	TL	TRUE	reported	textfile	2	TRUE	0.000149019	70.3729
rs185174247	A	G	A	G	0.0372806	0.309484	0.05609	0.0404762	FALSE	FALSE	FALSE	0.283003	0.274144	314403	MANTLE	TRUE	reported	0.00435145	1.1e-17	472174	TL	TRUE	reported	textfile	2	TRUE	0.000155428	73.4
rs188918174	T	C	T	C	0.0403062	-0.0234979	0.036106	0.0470495	FALSE	FALSE	FALSE	0.232318	0.919435	314403	MANTLE	TRUE	reported	0.00543604	1.2e-13	472174	TL	TRUE	reported	textfile	2	TRUE	0.00011642	54.9764
rs1907702	A	G	A	G	0.0150247	-0.0736592	0.766771	0.790448	FALSE	FALSE	FALSE	0.123562	0.551087	314403	MANTLE	TRUE	reported	0.00242651	5.9e-10	472174	TL	TRUE	reported	textfile	2	TRUE	8.11914e-05	38.3394
rs1957937	T	A	T	A	0.0209365	-0.029746	0.16018	0.180831	FALSE	TRUE	FALSE	0.125459	0.812581	314403	MANTLE	TRUE	reported	0.00273361	1.9e-14	472174	TL	TRUE	reported	textfile	2	TRUE	0.000124216	58.6588
rs1985369	G	A	G	A	-0.0311893	0.144827	0.868178	0.904295	FALSE	FALSE	FALSE	0.157878	0.358967	314403	MANTLE	TRUE	reported	0.00300952	3.6e-25	472174	TL	TRUE	reported	textfile	2	TRUE	0.000227413	107.403
rs201009932	T	TA	T	TA	0.0769296	0.367965	0.991068	0.985658	FALSE	FALSE	FALSE	0.340176	0.27939	314403	MANTLE	TRUE	reported	0.0116209	3.6e-11	472174	TL	TRUE	reported	textfile	2	TRUE	9.28036e-05	43.8234
rs2056726	A	G	A	G	-0.0228078	-0.0836759	0.214376	0.20972	FALSE	FALSE	FALSE	0.118605	0.480498	314403	MANTLE	TRUE	reported	0.00243638	7.9e-21	472174	TL	TRUE	reported	textfile	2	TRUE	0.000185564	87.6345
rs2230590	C	T	C	T	-0.0158022	-0.099478	0.510897	0.371429	FALSE	FALSE	FALSE	0.100276	0.321178	314403	MANTLE	TRUE	reported	0.00200806	3.6e-15	472174	TL	TRUE	reported	textfile	2	TRUE	0.000131136	61.927
rs2282764	G	A	G	A	-0.0224234	0.0146246	0.142384	0.143091	FALSE	FALSE	FALSE	0.140693	0.917212	314403	MANTLE	TRUE	reported	0.00289392	9.3e-15	472174	TL	TRUE	reported	textfile	2	TRUE	0.000127137	60.0383
rs2293579	A	G	A	G	-0.012915	-0.130822	0.386274	0.270551	FALSE	FALSE	FALSE	0.107422	0.223288	314403	MANTLE	TRUE	reported	0.00205481	3.3e-10	472174	TL	TRUE	reported	textfile	2	TRUE	8.36579e-05	39.5042
rs2538745	C	T	C	T	-0.012942	0.0155668	0.602841	0.530952	FALSE	FALSE	FALSE	0.09752	0.873175	314403	MANTLE	TRUE	reported	0.002056	3.1e-10	472174	TL	TRUE	reported	textfile	2	TRUE	8.39108e-05	39.6237
rs2555104	C	A	C	A	-0.0139717	-0.0380086	0.434255	0.469048	FALSE	FALSE	FALSE	0.098442	0.699422	314403	MANTLE	TRUE	reported	0.00203498	6.6e-12	472174	TL	TRUE	reported	textfile	2	TRUE	9.98235e-05	47.1386
rs2763979	T	C	T	C	-0.0277713	-0.0612382	0.359721	0.42381	FALSE	FALSE	FALSE	0.0983587	0.533546	314403	MANTLE	TRUE	reported	0.00208092	1.3e-40	472174	TL	TRUE	reported	textfile	2	TRUE	0.000377065	178.107
rs28502153	A	C	A	C	-0.0215916	-0.0428461	0.377958	0.363884	FALSE	FALSE	FALSE	0.101231	0.672111	314403	MANTLE	TRUE	reported	0.00206208	1.2e-25	472174	TL	TRUE	reported	textfile	2	TRUE	0.000232143	109.637
rs28577594	C	G	C	G	0.0187657	0.214848	0.709829	0.752876	FALSE	TRUE	FALSE	0.10846	0.0476025	314403	MANTLE	TRUE	reported	0.00224024	5.4e-17	472174	TL	TRUE	reported	textfile	2	TRUE	0.000148585	70.1679
rs2967355	C	A	C	A	-0.0461595	0.0431197	0.774276	0.830952	FALSE	FALSE	FALSE	0.12958	0.739312	314403	MANTLE	TRUE	reported	0.00238972	4e-83	472174	TL	TRUE	reported	textfile	2	TRUE	0.000789556	373.101
rs2977608	C	A	C	A	0.0129483	0.0637297	0.743949	0.705994	FALSE	FALSE	FALSE	0.106757	0.550534	314403	MANTLE	TRUE	reported	0.00233716	3e-08	472174	TL	TRUE	reported	textfile	2	TRUE	6.50007e-05	30.6935
rs3093888	A	G	A	G	-0.028973	-0.142466	0.05131	0.0761905	FALSE	FALSE	FALSE	0.173515	0.411614	314403	MANTLE	TRUE	reported	0.00452459	1.5e-10	472174	TL	TRUE	reported	textfile	2	TRUE	8.68338e-05	41.004
rs35640778	A	G	A	G	-0.209011	-0.398781	0.020757	0.00728291	FALSE	FALSE	FALSE	0.454669	0.380444	314403	MANTLE	TRUE	reported	0.00702087	9.59e-195	472174	TL	TRUE	reported	textfile	2	TRUE	0.00187344	886.247
rs3767952	A	G	A	G	0.0134472	0.146056	0.226709	0.247619	FALSE	FALSE	FALSE	0.117665	0.2145	314403	MANTLE	TRUE	reported	0.00238826	1.8e-08	472174	TL	TRUE	reported	textfile	2	TRUE	6.71381e-05	31.7029
rs3785074	G	A	G	A	0.023863	-0.0769717	0.289672	0.197619	FALSE	FALSE	FALSE	0.121032	0.524801	314403	MANTLE	TRUE	reported	0.00220455	2.6e-27	472174	TL	TRUE	reported	textfile	2	TRUE	0.000248085	117.168
rs3891167	G	A	G	A	-0.0425685	-0.0785727	0.253435	0.243277	FALSE	FALSE	FALSE	0.112802	0.486083	314403	MANTLE	TRUE	reported	0.00239551	1.2e-70	472174	TL	TRUE	reported	textfile	2	TRUE	0.000668326	315.776
rs41269079	A	T	A	T	0.0153617	0.0463673	0.188991	0.216975	FALSE	TRUE	FALSE	0.121066	0.701725	314403	MANTLE	TRUE	reported	0.0025499	1.7e-09	472174	TL	TRUE	reported	textfile	2	TRUE	7.68594e-05	36.2936
rs41304832	A	G	A	G	0.0611702	0.0263119	0.012378	0.0357143	FALSE	FALSE	FALSE	0.268717	0.921998	314403	MANTLE	TRUE	reported	0.0093095	5e-11	472174	TL	TRUE	reported	textfile	2	TRUE	9.14293e-05	43.1743
rs429358	C	T	C	T	0.0173498	0.192909	0.153969	0.209524	FALSE	FALSE	FALSE	0.128016	0.131834	314403	MANTLE	TRUE	reported	0.00277091	3.8e-10	472174	TL	TRUE	reported	textfile	2	TRUE	8.30244e-05	39.2051
rs4498805	T	G	T	G	0.0150601	-0.0570012	0.546632	0.495425	FALSE	FALSE	FALSE	0.0978117	0.560052	314403	MANTLE	TRUE	reported	0.00200376	5.7e-14	472174	TL	TRUE	reported	textfile	2	TRUE	0.000119622	56.4888
rs4530278	T	G	T	G	0.0138793	0.0498279	0.59815	0.615219	FALSE	FALSE	FALSE	0.100361	0.619551	314403	MANTLE	TRUE	reported	0.0020567	1.5e-11	472174	TL	TRUE	reported	textfile	2	TRUE	9.64382e-05	45.5398
rs45604339	T	C	T	C	-0.020433	0.101331	0.34242	0.404566	FALSE	FALSE	FALSE	0.101125	0.316327	314403	MANTLE	TRUE	reported	0.00211433	4.3e-22	472174	TL	TRUE	reported	textfile	2	TRUE	0.000197756	93.3936
rs4695407	G	A	G	A	0.0141511	0.0616002	0.507843	0.479561	FALSE	FALSE	FALSE	0.0992366	0.53477	314403	MANTLE	TRUE	reported	0.00199925	1.5e-12	472174	TL	TRUE	reported	textfile	2	TRUE	0.000106096	50.1008
rs4724	A	G	A	G	-0.0547446	0.148274	0.116598	0.123884	FALSE	FALSE	FALSE	0.157607	0.346815	314403	MANTLE	TRUE	reported	0.00312441	9.8e-69	472174	TL	TRUE	reported	textfile	2	TRUE	0.000649774	307.004
rs4731541	G	C	G	C	-0.0206119	-0.112209	0.624901	0.61662	FALSE	TRUE	FALSE	0.103034	0.276136	314403	MANTLE	TRUE	reported	0.00205962	1.4e-23	472174	TL	TRUE	reported	textfile	2	TRUE	0.000212064	100.152
rs4743037	T	C	T	C	0.0147971	0.00242749	0.230874	0.220878	FALSE	FALSE	FALSE	0.118731	0.983688	314403	MANTLE	TRUE	reported	0.00238094	5.1e-10	472174	TL	TRUE	reported	textfile	2	TRUE	8.17935e-05	38.6238
rs55747751	A	G	A	G	-0.0211612	0.253153	0.077375	0.0715966	FALSE	FALSE	FALSE	0.210788	0.229756	314403	MANTLE	TRUE	reported	0.00375164	1.7e-08	472174	TL	TRUE	reported	textfile	2	TRUE	6.73763e-05	31.8153
rs56799554	G	A	G	A	-0.0259793	-0.146748	0.170183	0.210056	FALSE	FALSE	FALSE	0.117208	0.210557	314403	MANTLE	TRUE	reported	0.00267858	3e-22	472174	TL	TRUE	reported	textfile	2	TRUE	0.000199185	94.0684
rs5742915	C	T	C	T	0.0193377	0.0465233	0.445829	0.423688	FALSE	FALSE	FALSE	0.099868	0.641325	314403	MANTLE	TRUE	reported	0.00202886	1.6e-21	472174	TL	TRUE	reported	textfile	2	TRUE	0.000192362	90.8455
rs59409453	G	A	G	A	0.0202133	0.121589	0.730602	0.809963	FALSE	FALSE	FALSE	0.121273	0.316049	314403	MANTLE	TRUE	reported	0.00230175	1.6e-18	472174	TL	TRUE	reported	textfile	2	TRUE	0.0001633	77.1181
rs6007020	C	T	C	T	0.0144904	0.0481473	0.367823	0.368235	FALSE	FALSE	FALSE	0.102922	0.639925	314403	MANTLE	TRUE	reported	0.00209637	4.8e-12	472174	TL	TRUE	reported	textfile	2	TRUE	0.000101176	47.7775
rs6054257	A	G	A	G	-0.0141684	-0.0836039	0.793522	0.793203	FALSE	FALSE	FALSE	0.124495	0.501876	314403	MANTLE	TRUE	reported	0.00247729	1.1e-08	472174	TL	TRUE	reported	textfile	2	TRUE	6.92717e-05	32.7104
rs61748181	T	C	T	C	-0.059181	-0.642526	0.028928	0.0261625	FALSE	FALSE	FALSE	0.245662	0.00891025	314403	MANTLE	TRUE	reported	0.00595394	2.8e-23	472174	TL	TRUE	reported	textfile	2	TRUE	0.000209201	98.7993
rs6536702	A	G	A	G	0.0534148	0.179676	0.774647	0.844407	FALSE	FALSE	FALSE	0.12774	0.159555	314403	MANTLE	TRUE	reported	0.00238875	9.4e-111	472174	TL	TRUE	reported	textfile	2	TRUE	0.00105784	500.011
rs6584579	G	A	G	A	0.0114923	-0.0106217	0.398876	0.326377	FALSE	FALSE	FALSE	0.105352	0.919693	314403	MANTLE	TRUE	reported	0.00204674	2e-08	472174	TL	TRUE	reported	textfile	2	TRUE	6.67663e-05	31.5273
rs6587577	G	A	G	A	-0.0182148	-0.0516555	0.826346	0.835714	FALSE	FALSE	FALSE	0.13429	0.700492	314403	MANTLE	TRUE	reported	0.0026359	4.8e-12	472174	TL	TRUE	reported	textfile	2	TRUE	0.000101122	47.7517
rs6659669	T	C	T	C	-0.0117091	0.0475951	0.605095	0.602353	FALSE	FALSE	FALSE	0.0998945	0.633751	314403	MANTLE	TRUE	reported	0.00205167	1.1e-08	472174	TL	TRUE	reported	textfile	2	TRUE	6.89763e-05	32.5709
rs6669563	A	G	A	G	0.0182358	0.0547184	0.437768	0.485658	FALSE	FALSE	FALSE	0.0987069	0.579338	314403	MANTLE	TRUE	reported	0.00202476	2.1e-19	472174	TL	TRUE	reported	textfile	2	TRUE	0.000171762	81.1149
rs66731853	A	G	A	G	-0.0177791	-0.00350729	0.317304	0.192857	FALSE	FALSE	FALSE	0.123716	0.977383	314403	MANTLE	TRUE	reported	0.00215421	1.5e-16	472174	TL	TRUE	reported	textfile	2	TRUE	0.000144238	68.1148
rs6751209	C	T	C	T	-0.0140465	-0.0101121	0.204231	0.17788	FALSE	FALSE	FALSE	0.1277	0.936884	314403	MANTLE	TRUE	reported	0.00248465	1.6e-08	472174	TL	TRUE	reported	textfile	2	TRUE	6.76822e-05	31.9598
rs6776756	A	G	A	G	-0.0174439	-0.0361062	0.597562	0.526032	FALSE	FALSE	FALSE	0.0993182	0.716201	314403	MANTLE	TRUE	reported	0.00203747	1.1e-17	472174	TL	TRUE	reported	textfile	2	TRUE	0.000155216	73.2998
rs6881568	A	C	A	C	0.0169256	-0.149899	0.36258	0.242857	FALSE	FALSE	FALSE	0.109653	0.171615	314403	MANTLE	TRUE	reported	0.00207735	3.7e-16	472174	TL	TRUE	reported	textfile	2	TRUE	0.000140574	66.3845
rs7099229	A	G	A	G	-0.0153288	-0.237561	0.273301	0.146004	FALSE	FALSE	FALSE	0.128268	0.0640162	314403	MANTLE	TRUE	reported	0.00224403	8.4e-12	472174	TL	TRUE	reported	textfile	2	TRUE	9.8813e-05	46.6613
rs7164950	G	A	G	A	0.0129362	-0.00189832	0.405979	0.41943	FALSE	FALSE	FALSE	0.100417	0.984917	314403	MANTLE	TRUE	reported	0.00204001	2.3e-10	472174	TL	TRUE	reported	textfile	2	TRUE	8.51549e-05	40.2112
rs7209057	A	G	A	G	0.011819	0.0146243	0.561044	0.558758	FALSE	FALSE	FALSE	0.0988013	0.882329	314403	MANTLE	TRUE	reported	0.00202865	5.7e-09	472174	TL	TRUE	reported	textfile	2	TRUE	7.1881e-05	33.9426
rs7221585	T	C	T	C	0.0143271	-0.0562141	0.22401	0.273856	FALSE	FALSE	FALSE	0.107635	0.601484	314403	MANTLE	TRUE	reported	0.00247042	6.7e-09	472174	TL	TRUE	reported	textfile	2	TRUE	7.12266e-05	33.6336
rs73581419	T	C	T	C	0.0229838	-0.168389	0.106605	0.0690476	FALSE	FALSE	FALSE	0.179707	0.348749	314403	MANTLE	TRUE	reported	0.00324156	1.3e-12	472174	TL	TRUE	reported	textfile	2	TRUE	0.00010646	50.2729
rs75664430	G	C	G	C	-0.0235179	-0.0992328	0.248028	0.178571	FALSE	TRUE	FALSE	0.124414	0.425103	314403	MANTLE	TRUE	reported	0.0023186	3.6e-24	472174	TL	TRUE	reported	textfile	2	TRUE	0.000217846	102.883
rs76065543	T	C	T	C	0.0342843	-0.103202	0.137527	0.171289	FALSE	FALSE	FALSE	0.125757	0.411849	314403	MANTLE	TRUE	reported	0.00290708	4.2e-32	472174	TL	TRUE	reported	textfile	2	TRUE	0.000294474	139.083
rs76094497	A	G	A	G	0.0278689	-0.337049	0.051569	0.0166667	FALSE	FALSE	FALSE	0.314562	0.28395	314403	MANTLE	TRUE	reported	0.00461731	1.6e-09	472174	TL	TRUE	reported	textfile	2	TRUE	7.71482e-05	36.43
rs76219171	A	G	A	G	0.0359839	0.0236781	0.058433	0.0357423	FALSE	FALSE	FALSE	0.266105	0.929098	314403	MANTLE	TRUE	reported	0.00431741	7.8e-17	472174	TL	TRUE	reported	textfile	2	TRUE	0.000147097	69.4653
rs762679	A	T	A	T	0.0310104	-0.0326946	0.856501	0.823165	FALSE	TRUE	FALSE	0.130952	0.802843	314403	MANTLE	TRUE	reported	0.00285024	1.4e-27	472174	TL	TRUE	reported	textfile	2	TRUE	0.000250635	118.372
rs76666449	C	T	C	T	0.0295125	-0.0853066	0.100625	0.131027	FALSE	FALSE	FALSE	0.141362	0.5462	314403	MANTLE	TRUE	reported	0.00333186	8.2e-19	472174	TL	TRUE	reported	textfile	2	TRUE	0.000166136	78.4579
rs77231040	C	G	C	G	0.0989303	0.40635	0.005742	0.0380952	FALSE	TRUE	FALSE	0.30095	0.176944	314403	MANTLE	TRUE	reported	0.0134649	2e-13	472174	TL	TRUE	reported	textfile	2	TRUE	0.000114314	53.9822
rs7726159	A	C	A	C	0.0707719	0.262841	0.327295	0.385929	FALSE	FALSE	FALSE	0.105135	0.0124182	314403	MANTLE	TRUE	reported	0.0021282	1e-200	472174	TL	TRUE	reported	textfile	2	TRUE	0.00233657	1105.85
rs7772289	T	G	T	G	0.017549	-0.099493	0.503081	0.592857	FALSE	FALSE	FALSE	0.100736	0.323318	314403	MANTLE	TRUE	reported	0.00200003	1.7e-18	472174	TL	TRUE	reported	textfile	2	TRUE	0.000163027	76.9892
rs77732866	A	G	A	G	0.0177942	-0.0226409	0.137597	0.14014	FALSE	FALSE	FALSE	0.140605	0.872074	314403	MANTLE	TRUE	reported	0.00290595	9.2e-10	472174	TL	TRUE	reported	textfile	2	TRUE	7.94043e-05	37.4955
rs7790856	T	C	T	C	-0.0437199	-0.272465	0.289139	0.178571	FALSE	FALSE	FALSE	0.117153	0.0200336	314403	MANTLE	TRUE	reported	0.00220526	1.8e-87	472174	TL	TRUE	reported	textfile	2	TRUE	0.000831716	393.04
rs78491606	C	A	C	A	-0.0756311	-0.285972	0.018433	0.0214846	FALSE	FALSE	FALSE	0.293158	0.329318	314403	MANTLE	TRUE	reported	0.00741168	1.9e-24	472174	TL	TRUE	reported	textfile	2	TRUE	0.00022048	104.128
rs79977579	A	C	A	C	0.0281517	0.0866549	0.09555	0.103175	FALSE	FALSE	FALSE	0.167851	0.605673	314403	MANTLE	TRUE	reported	0.00343182	2.3e-16	472174	TL	TRUE	reported	textfile	2	TRUE	0.000142494	67.2912
rs80116508	A	G	A	G	-0.0352672	-0.327456	0.062356	0.0547619	FALSE	FALSE	FALSE	0.183415	0.0742079	314403	MANTLE	TRUE	reported	0.00415151	2e-17	472174	TL	TRUE	reported	textfile	2	TRUE	0.000152813	72.1652
rs80324517	A	G	A	G	0.0396515	0.346825	0.048259	0.0809804	FALSE	FALSE	FALSE	0.205092	0.0908239	314403	MANTLE	TRUE	reported	0.00466286	1.8e-17	472174	TL	TRUE	reported	textfile	2	TRUE	0.000153125	72.3124
rs8102497	A	G	A	G	-0.0149654	-0.103422	0.431828	0.426041	FALSE	FALSE	FALSE	0.0986474	0.294454	314403	MANTLE	TRUE	reported	0.0020233	1.4e-13	472174	TL	TRUE	reported	textfile	2	TRUE	0.000115852	54.7084
rs8105767	G	A	G	A	0.0328384	0.11177	0.29467	0.342148	FALSE	FALSE	FALSE	0.10462	0.285367	314403	MANTLE	TRUE	reported	0.00220117	2.5e-50	472174	TL	TRUE	reported	textfile	2	TRUE	0.00047114	222.564
rs869785	C	T	C	T	-0.0147303	0.0878472	0.672471	0.676723	FALSE	FALSE	FALSE	0.103217	0.394716	314403	MANTLE	TRUE	reported	0.00212801	4.4e-12	472174	TL	TRUE	reported	textfile	2	TRUE	0.000101468	47.9153
rs871134	T	C	T	C	-0.0182986	-0.141173	0.569032	0.519477	FALSE	FALSE	FALSE	0.0992368	0.154856	314403	MANTLE	TRUE	reported	0.0020263	1.7e-19	472174	TL	TRUE	reported	textfile	2	TRUE	0.000172684	81.5505
rs932002	T	C	T	C	-0.0402052	-0.0101591	0.150843	0.236452	FALSE	FALSE	FALSE	0.115072	0.92965	314403	MANTLE	TRUE	reported	0.00279667	7.3e-47	472174	TL	TRUE	reported	textfile	2	TRUE	0.000437512	206.671
rs9398196	G	A	G	A	-0.0143586	-0.0750907	0.52005	0.605574	FALSE	FALSE	FALSE	0.101441	0.459153	314403	MANTLE	TRUE	reported	0.00201175	9.5e-13	472174	TL	TRUE	reported	textfile	2	TRUE	0.000107877	50.9418
rs939916	A	G	A	G	0.0241795	-0.0639459	0.669967	0.718506	FALSE	FALSE	FALSE	0.110658	0.563351	314403	MANTLE	TRUE	reported	0.00216724	6.6e-29	472174	TL	TRUE	reported	textfile	2	TRUE	0.000263551	124.474
rs9419958	C	T	C	T	-0.0810098	-0.0545372	0.86139	0.880261	FALSE	FALSE	FALSE	0.154898	0.724776	314403	MANTLE	TRUE	reported	0.00293847	2.6e-167	472174	TL	TRUE	reported	textfile	2	TRUE	0.00160706	760.03
rs9600019	T	C	T	C	0.0127134	0.0128616	0.335579	0.370999	FALSE	FALSE	FALSE	0.102167	0.899821	314403	MANTLE	TRUE	reported	0.00213096	2.4e-09	472174	TL	TRUE	reported	textfile	2	TRUE	7.53769e-05	35.5935
rs9878436	T	C	T	C	-0.0143407	0.0103877	0.434393	0.35	FALSE	FALSE	FALSE	0.102845	0.919547	314403	MANTLE	TRUE	reported	0.00201819	1.2e-12	472174	TL	TRUE	reported	textfile	2	TRUE	0.000106922	50.4911
rs9955360	A	C	A	C	-0.0190311	-0.030108	0.869288	0.851849	FALSE	FALSE	FALSE	0.139408	0.829011	314403	MANTLE	TRUE	reported	0.00299791	2.2e-10	472174	TL	TRUE	reported	textfile	2	TRUE	8.53398e-05	40.2985

## Sheet: marginal zone b-cell lymphoma
SNP	effect_allele.exposure	other_allele.exposure	effect_allele.outcome	other_allele.outcome	beta.exposure	beta.outcome	eaf.exposure	eaf.outcome	remove	palindromic	ambiguous	se.outcome	pval.outcome	samplesize.outcome	outcome	mr_keep.outcome	pval_origin.outcome	se.exposure	pval.exposure	samplesize.exposure	exposure	mr_keep.exposure	pval_origin.exposure	data_source.exposure	action	mr_keep	R2	F
rs1003322	A	C	A	C	0.0141734	0.325958	0.213742	0.186207	FALSE	FALSE	FALSE	0.142106	0.0218037	314395	MARGINAL	TRUE	reported	0.00247546	1e-08	472174	TL	TRUE	reported	textfile	2	TRUE	6.94231e-05	32.7819
rs10112752	A	G	A	G	-0.0287522	-0.043794	0.430369	0.434993	FALSE	FALSE	FALSE	0.100883	0.664209	314395	MARGINAL	TRUE	reported	0.00202518	9.5e-46	472174	TL	TRUE	reported	textfile	2	TRUE	0.000426705	201.564
rs1023767	A	G	A	G	-0.0183732	0.00436225	0.237595	0.373762	FALSE	FALSE	FALSE	0.102908	0.966188	314395	MARGINAL	TRUE	reported	0.00234772	5e-15	472174	TL	TRUE	reported	textfile	2	TRUE	0.000129694	61.2456
rs10768683	G	C	G	C	0.0469922	-0.0328957	0.841033	0.792089	FALSE	TRUE	FALSE	0.12523	0.792795	314395	MARGINAL	TRUE	reported	0.00277015	1.5e-64	472174	TL	TRUE	reported	textfile	2	TRUE	0.000609086	287.768
rs10773176	G	A	G	A	-0.0172009	0.0790291	0.741214	0.81688	FALSE	FALSE	FALSE	0.126159	0.531036	314395	MARGINAL	TRUE	reported	0.00228534	5.2e-14	472174	TL	TRUE	reported	textfile	2	TRUE	0.000119963	56.6499
rs10774624	A	G	A	G	0.0149944	0.0772276	0.53276	0.615463	FALSE	FALSE	FALSE	0.102294	0.450274	314395	MARGINAL	TRUE	reported	0.00205494	2.9e-13	472174	TL	TRUE	reported	textfile	2	TRUE	0.000112748	53.2425
rs10805346	C	T	C	T	0.0117072	-0.0724694	0.439339	0.43345	FALSE	FALSE	FALSE	0.101043	0.473241	314395	MARGINAL	TRUE	reported	0.00202147	7e-09	472174	TL	TRUE	reported	textfile	2	TRUE	7.10295e-05	33.5405
rs10840270	G	C	G	C	0.014383	-0.116993	0.655684	0.640837	FALSE	TRUE	FALSE	0.106517	0.272055	314395	MARGINAL	TRUE	reported	0.00212494	1.3e-11	472174	TL	TRUE	reported	textfile	2	TRUE	9.702e-05	45.8146
rs10845387	A	G	A	G	-0.0141214	0.0752748	0.352666	0.362667	FALSE	FALSE	FALSE	0.107076	0.482054	314395	MARGINAL	TRUE	reported	0.00209396	1.5e-11	472174	TL	TRUE	reported	textfile	2	TRUE	9.63108e-05	45.4796
rs10905255	T	G	T	G	-0.0182493	0.128424	0.57919	0.591633	FALSE	FALSE	FALSE	0.10048	0.201213	314395	MARGINAL	TRUE	reported	0.00203099	2.6e-19	472174	TL	TRUE	reported	textfile	2	TRUE	0.000170962	80.7374
rs10936598	C	A	C	A	-0.0656433	0.051095	0.32379	0.360027	FALSE	FALSE	FALSE	0.104755	0.625723	314395	MARGINAL	TRUE	reported	0.00214663	1e-200	472174	TL	TRUE	reported	textfile	2	TRUE	0.00197654	935.114
rs11085072	T	C	T	C	-0.0131806	0.113582	0.236909	0.180188	FALSE	FALSE	FALSE	0.135268	0.401086	314395	MARGINAL	TRUE	reported	0.00236713	2.6e-08	472174	TL	TRUE	reported	textfile	2	TRUE	6.56592e-05	31.0045
rs11117354	C	T	C	T	0.0232506	0.0630002	0.696513	0.596408	FALSE	FALSE	FALSE	0.101281	0.53392	314395	MARGINAL	TRUE	reported	0.00219601	3.4e-26	472174	TL	TRUE	reported	textfile	2	TRUE	0.000237353	112.098
rs111527438	C	T	C	T	0.0125	0.0581202	0.351251	0.335449	FALSE	FALSE	FALSE	0.107345	0.588208	314395	MARGINAL	TRUE	reported	0.00211016	3.1e-09	472174	TL	TRUE	reported	textfile	2	TRUE	7.43113e-05	35.0903
rs111950327	C	G	C	G	0.0238271	0.252901	0.063628	0.0643564	FALSE	TRUE	FALSE	0.224405	0.259749	314395	MARGINAL	TRUE	reported	0.00409406	5.9e-09	472174	TL	TRUE	reported	textfile	2	TRUE	7.173e-05	33.8713
rs112394943	C	T	C	T	-0.0198961	0.187621	0.162741	0.264065	FALSE	FALSE	FALSE	0.120285	0.118808	314395	MARGINAL	TRUE	reported	0.00281641	1.6e-12	472174	TL	TRUE	reported	textfile	2	TRUE	0.000105681	49.9048
rs113525195	A	C	A	C	-0.0124075	-0.00467579	0.290254	0.302019	FALSE	FALSE	FALSE	0.108619	0.965664	314395	MARGINAL	TRUE	reported	0.00224132	3.1e-08	472174	TL	TRUE	reported	textfile	2	TRUE	6.48979e-05	30.645
rs11557154	T	C	T	C	-0.0343719	-0.148238	0.13003	0.115424	FALSE	FALSE	FALSE	0.147845	0.316024	314395	MARGINAL	TRUE	reported	0.00298538	1.1e-30	472174	TL	TRUE	reported	textfile	2	TRUE	0.000280662	132.558
rs11579626	C	A	C	A	0.0265113	-0.211857	0.084882	0.0972335	FALSE	FALSE	FALSE	0.154074	0.16912	314395	MARGINAL	TRUE	reported	0.00357752	1.3e-13	472174	TL	TRUE	reported	textfile	2	TRUE	0.000116291	54.9156
rs11584821	T	C	T	C	-0.0306517	-0.0477901	0.176208	0.174675	FALSE	FALSE	FALSE	0.129579	0.712269	314395	MARGINAL	TRUE	reported	0.00263623	3e-31	472174	TL	TRUE	reported	textfile	2	TRUE	0.000286231	135.189
rs116863223	A	G	A	G	-0.0817874	-0.162462	0.011763	0.0123762	FALSE	FALSE	FALSE	0.413948	0.694711	314395	MARGINAL	TRUE	reported	0.00937157	2.6e-18	472174	TL	TRUE	reported	textfile	2	TRUE	0.000161278	76.1634
rs11699829	A	G	A	G	0.0641957	-0.0370207	0.034146	0.0153271	FALSE	FALSE	FALSE	0.409378	0.927944	314395	MARGINAL	TRUE	reported	0.00602028	1.5e-26	472174	TL	TRUE	reported	textfile	2	TRUE	0.000240753	113.704
rs117034449	A	G	A	G	0.0374377	0.0629814	0.023304	0.0173267	FALSE	FALSE	FALSE	0.396249	0.873713	314395	MARGINAL	TRUE	reported	0.00667898	2.1e-08	472174	TL	TRUE	reported	textfile	2	TRUE	6.65376e-05	31.4193
rs117407747	T	C	T	C	0.0450533	0.153588	0.027571	0.0119491	FALSE	FALSE	FALSE	0.498704	0.758101	314395	MARGINAL	TRUE	reported	0.00611706	1.8e-13	472174	TL	TRUE	reported	textfile	2	TRUE	0.000114872	54.2458
rs11746381	C	T	C	T	0.0329955	-0.10058	0.0568	0.064405	FALSE	FALSE	FALSE	0.194128	0.604381	314395	MARGINAL	TRUE	reported	0.00431036	1.9e-14	472174	TL	TRUE	reported	textfile	2	TRUE	0.000124087	58.5977
rs117512405	A	G	A	G	-0.0790134	0.127902	0.017043	0.0614929	FALSE	FALSE	FALSE	0.223149	0.566529	314395	MARGINAL	TRUE	reported	0.00824611	9.5e-22	472174	TL	TRUE	reported	textfile	2	TRUE	0.000194409	91.8124
rs117630647	A	G	A	G	0.059565	-0.0731177	0.021346	0.0153465	FALSE	FALSE	FALSE	0.393262	0.852503	314395	MARGINAL	TRUE	reported	0.00720413	1.4e-16	472174	TL	TRUE	reported	textfile	2	TRUE	0.000144762	68.3624
rs11769630	A	T	A	T	-0.0256807	-0.0150762	0.072227	0.103679	FALSE	TRUE	FALSE	0.163564	0.926561	314395	MARGINAL	TRUE	reported	0.00389475	4.3e-11	472174	TL	TRUE	reported	textfile	2	TRUE	9.20688e-05	43.4763
rs11991877	A	T	A	T	-0.030138	-0.179448	0.889309	0.836634	FALSE	TRUE	FALSE	0.142963	0.209402	314395	MARGINAL	TRUE	reported	0.00318686	3.2e-21	472174	TL	TRUE	reported	textfile	2	TRUE	0.000189373	89.4337
rs12369950	C	T	C	T	-0.0178308	-0.00335977	0.140675	0.15099	FALSE	FALSE	FALSE	0.139898	0.98084	314395	MARGINAL	TRUE	reported	0.00290205	8e-10	472174	TL	TRUE	reported	textfile	2	TRUE	7.99457e-05	37.7511
rs12412214	A	G	A	G	-0.0245174	0.118862	0.279765	0.418171	FALSE	FALSE	FALSE	0.102769	0.247435	314395	MARGINAL	TRUE	reported	0.00222685	3.4e-28	472174	TL	TRUE	reported	textfile	2	TRUE	0.000256657	121.217
rs12451892	C	T	C	T	-0.0116145	0.086808	0.380511	0.45167	FALSE	FALSE	FALSE	0.101127	0.390668	314395	MARGINAL	TRUE	reported	0.00207578	2.2e-08	472174	TL	TRUE	reported	textfile	2	TRUE	6.62991e-05	31.3066
rs1291143	C	A	C	A	0.0493145	-0.234026	0.849026	0.735149	FALSE	FALSE	FALSE	0.119718	0.0506058	314395	MARGINAL	TRUE	reported	0.0027991	1.8e-69	472174	TL	TRUE	reported	textfile	2	TRUE	0.000656939	310.392
rs12925933	C	A	C	A	-0.0146622	-0.0955397	0.66221	0.521811	FALSE	FALSE	FALSE	0.100663	0.342567	314395	MARGINAL	TRUE	reported	0.00213796	7e-12	472174	TL	TRUE	reported	textfile	2	TRUE	9.95987e-05	47.0324
rs12932179	G	A	G	A	-0.0136257	-0.0778071	0.561399	0.599039	FALSE	FALSE	FALSE	0.102634	0.448389	314395	MARGINAL	TRUE	reported	0.0020276	1.8e-11	472174	TL	TRUE	reported	textfile	2	TRUE	9.56334e-05	45.1597
rs13062095	C	T	C	T	0.0138552	0.03324	0.327843	0.375646	FALSE	FALSE	FALSE	0.103877	0.748973	314395	MARGINAL	TRUE	reported	0.00214113	9.7e-11	472174	TL	TRUE	reported	textfile	2	TRUE	8.86745e-05	41.8733
rs131797	T	TAAAAA	T	TAAAAA	0.0243752	0.0818086	0.235625	0.193642	FALSE	FALSE	FALSE	0.130262	0.529984	314395	MARGINAL	TRUE	reported	0.00236561	6.8e-25	472174	TL	TRUE	reported	textfile	2	TRUE	0.000224807	106.172
rs13230646	C	T	C	T	-0.0173277	-0.258609	0.248945	0.139274	FALSE	FALSE	FALSE	0.132023	0.0501337	314395	MARGINAL	TRUE	reported	0.00232377	8.9e-14	472174	TL	TRUE	reported	textfile	2	TRUE	0.000117745	55.6024
rs1332941	G	A	G	A	0.0256552	-0.0200927	0.820466	0.792603	FALSE	FALSE	FALSE	0.124063	0.87134	314395	MARGINAL	TRUE	reported	0.00273159	5.9e-21	472174	TL	TRUE	reported	textfile	2	TRUE	0.000186783	88.21
rs137901416	A	G	A	G	0.04572	0.0185823	0.100311	0.0668317	FALSE	FALSE	FALSE	0.202127	0.926751	314395	MARGINAL	TRUE	reported	0.00332355	4.7e-43	472174	TL	TRUE	reported	textfile	2	TRUE	0.000400619	189.237
rs139669835	T	C	T	C	-0.0612563	-1.03226	0.009365		FALSE	FALSE	FALSE	1.44892	0.476197	314395	MARGINAL	TRUE	reported	0.0105346	6.1e-09	472174	TL	TRUE	reported	textfile	2	TRUE	7.16032e-05	33.8114
rs139795227	C	A	C	A	0.0599379	-0.115748	0.014021	0.0238109	FALSE	FALSE	FALSE	0.310392	0.709215	314395	MARGINAL	TRUE	reported	0.00873247	6.7e-12	472174	TL	TRUE	reported	textfile	2	TRUE	9.97662e-05	47.1115
rs141214782	TTATC	T	TTATC	T	-0.0246687	-0.0934095	0.101206	0.0965347	FALSE	FALSE	FALSE	0.163176	0.56702	314395	MARGINAL	TRUE	reported	0.00335723	2e-13	472174	TL	TRUE	reported	textfile	2	TRUE	0.000114335	53.9919
rs142426306	T	C	T	C	-0.0504903	-0.293761	0.039544	0.0305766	FALSE	FALSE	FALSE	0.25291	0.24543	314395	MARGINAL	TRUE	reported	0.00539933	8.7e-21	472174	TL	TRUE	reported	textfile	2	TRUE	0.000185163	87.4449
rs143190905	T	G	T	G	-0.0723995	-0.0881811	0.080404	0.0693069	FALSE	FALSE	FALSE	0.188965	0.640748	314395	MARGINAL	TRUE	reported	0.00369421	1.6e-85	472174	TL	TRUE	reported	textfile	2	TRUE	0.00081278	384.084
rs144204502	T	C	T	C	-0.100574	-0.198264	0.012562	0.029703	FALSE	FALSE	FALSE	0.266123	0.456265	314395	MARGINAL	TRUE	reported	0.00913369	3.4e-28	472174	TL	TRUE	reported	textfile	2	TRUE	0.000256723	121.249
rs145114957	G	C	G	C	0.0272605	0.0560832	0.042648	0.0420792	FALSE	TRUE	FALSE	0.255469	0.826237	314395	MARGINAL	TRUE	reported	0.00498872	4.6e-08	472174	TL	TRUE	reported	textfile	2	TRUE	6.32353e-05	29.8598
rs150150565	T	C	T	C	0.063762	0.194884	0.021455	0.0222772	FALSE	FALSE	FALSE	0.368479	0.596883	314395	MARGINAL	TRUE	reported	0.00739877	6.8e-18	472174	TL	TRUE	reported	textfile	2	TRUE	0.000157266	74.2682
rs16978028	T	A	T	A	-0.029945	-0.187106	0.143727	0.0693069	FALSE	TRUE	FALSE	0.18074	0.300565	314395	MARGINAL	TRUE	reported	0.00285068	8.2e-26	472174	TL	TRUE	reported	textfile	2	TRUE	0.000233641	110.344
rs17445108	A	G	A	G	-0.0168922	0.129987	0.12695	0.140914	FALSE	FALSE	FALSE	0.151387	0.390537	314395	MARGINAL	TRUE	reported	0.00300983	2e-08	472174	TL	TRUE	reported	textfile	2	TRUE	6.67049e-05	31.4983
rs17677991	G	C	G	C	0.0222664	0.0271302	0.342123	0.403465	FALSE	TRUE	FALSE	0.102218	0.79069	314395	MARGINAL	TRUE	reported	0.00210806	4.4e-26	472174	TL	TRUE	reported	textfile	2	TRUE	0.000236227	111.566
rs182059586	C	T	C	T	-0.0571159	-0.323999	0.02511	0.0049505	FALSE	FALSE	FALSE	0.587063	0.581017	314395	MARGINAL	TRUE	reported	0.00680853	4.9e-17	472174	TL	TRUE	reported	textfile	2	TRUE	0.000149019	70.3729
rs185174247	A	G	A	G	0.0372806	-0.123173	0.05609	0.0272277	FALSE	FALSE	FALSE	0.288606	0.669536	314395	MARGINAL	TRUE	reported	0.00435145	1.1e-17	472174	TL	TRUE	reported	textfile	2	TRUE	0.000155428	73.4
rs188918174	T	C	T	C	0.0403062	-0.0053021	0.036106	0.0470006	FALSE	FALSE	FALSE	0.237391	0.982181	314395	MARGINAL	TRUE	reported	0.00543604	1.2e-13	472174	TL	TRUE	reported	textfile	2	TRUE	0.00011642	54.9764
rs1907702	A	G	A	G	0.0150247	0.113556	0.766771	0.820763	FALSE	FALSE	FALSE	0.125331	0.364912	314395	MARGINAL	TRUE	reported	0.00242651	5.9e-10	472174	TL	TRUE	reported	textfile	2	TRUE	8.11914e-05	38.3394
rs1957937	T	A	T	A	0.0209365	-0.0203308	0.16018	0.180839	FALSE	TRUE	FALSE	0.128507	0.874292	314395	MARGINAL	TRUE	reported	0.00273361	1.9e-14	472174	TL	TRUE	reported	textfile	2	TRUE	0.000124216	58.6588
rs1985369	G	A	G	A	-0.0311893	0.252798	0.868178	0.914842	FALSE	FALSE	FALSE	0.162234	0.119179	314395	MARGINAL	TRUE	reported	0.00300952	3.6e-25	472174	TL	TRUE	reported	textfile	2	TRUE	0.000227413	107.403
rs201009932	T	TA	T	TA	0.0769296	0.388357	0.991068	0.984828	FALSE	FALSE	FALSE	0.333156	0.243741	314395	MARGINAL	TRUE	reported	0.0116209	3.6e-11	472174	TL	TRUE	reported	textfile	2	TRUE	9.28036e-05	43.8234
rs2056726	A	G	A	G	-0.0228078	-0.00726163	0.214376	0.226257	FALSE	FALSE	FALSE	0.119548	0.951565	314395	MARGINAL	TRUE	reported	0.00243638	7.9e-21	472174	TL	TRUE	reported	textfile	2	TRUE	0.000185564	87.6345
rs2230590	C	T	C	T	-0.0158022	0.0233313	0.510897	0.403465	FALSE	FALSE	FALSE	0.102396	0.81976	314395	MARGINAL	TRUE	reported	0.00200806	3.6e-15	472174	TL	TRUE	reported	textfile	2	TRUE	0.000131136	61.927
rs2282764	G	A	G	A	-0.0224234	0.0708016	0.142384	0.150942	FALSE	FALSE	FALSE	0.142981	0.62047	314395	MARGINAL	TRUE	reported	0.00289392	9.3e-15	472174	TL	TRUE	reported	textfile	2	TRUE	0.000127137	60.0383
rs2293579	A	G	A	G	-0.012915	-0.0705377	0.386274	0.284721	FALSE	FALSE	FALSE	0.108607	0.516031	314395	MARGINAL	TRUE	reported	0.00205481	3.3e-10	472174	TL	TRUE	reported	textfile	2	TRUE	8.36579e-05	39.5042
rs2538745	C	T	C	T	-0.012942	-0.0591746	0.602841	0.514851	FALSE	FALSE	FALSE	0.0997593	0.553065	314395	MARGINAL	TRUE	reported	0.002056	3.1e-10	472174	TL	TRUE	reported	textfile	2	TRUE	8.39108e-05	39.6237
rs2555104	C	A	C	A	-0.0139717	-0.102308	0.434255	0.455494	FALSE	FALSE	FALSE	0.0997771	0.305189	314395	MARGINAL	TRUE	reported	0.00203498	6.6e-12	472174	TL	TRUE	reported	textfile	2	TRUE	9.98235e-05	47.1386
rs2763979	T	C	T	C	-0.0277713	0.144766	0.359721	0.470297	FALSE	FALSE	FALSE	0.100445	0.149513	314395	MARGINAL	TRUE	reported	0.00208092	1.3e-40	472174	TL	TRUE	reported	textfile	2	TRUE	0.000377065	178.107
rs28502153	A	C	A	C	-0.0215916	-0.0981245	0.377958	0.351485	FALSE	FALSE	FALSE	0.103029	0.340898	314395	MARGINAL	TRUE	reported	0.00206208	1.2e-25	472174	TL	TRUE	reported	textfile	2	TRUE	0.000232143	109.637
rs28577594	C	G	C	G	0.0187657	-0.0310563	0.709829	0.705116	FALSE	TRUE	FALSE	0.11051	0.778689	314395	MARGINAL	TRUE	reported	0.00224024	5.4e-17	472174	TL	TRUE	reported	textfile	2	TRUE	0.000148585	70.1679
rs2967355	C	A	C	A	-0.0461595	-0.131289	0.774276	0.80198	FALSE	FALSE	FALSE	0.130672	0.315032	314395	MARGINAL	TRUE	reported	0.00238972	4e-83	472174	TL	TRUE	reported	textfile	2	TRUE	0.000789556	373.101
rs2977608	C	A	C	A	0.0129483	0.0598048	0.743949	0.70629	FALSE	FALSE	FALSE	0.108707	0.582218	314395	MARGINAL	TRUE	reported	0.00233716	3e-08	472174	TL	TRUE	reported	textfile	2	TRUE	6.50007e-05	30.6935
rs3093888	A	G	A	G	-0.028973	-0.036318	0.05131	0.0854688	FALSE	FALSE	FALSE	0.17646	0.836936	314395	MARGINAL	TRUE	reported	0.00452459	1.5e-10	472174	TL	TRUE	reported	textfile	2	TRUE	8.68338e-05	41.004
rs35640778	A	G	A	G	-0.209011	-0.462154	0.020757	0.00742574	FALSE	FALSE	FALSE	0.437291	0.290578	314395	MARGINAL	TRUE	reported	0.00702087	9.59e-195	472174	TL	TRUE	reported	textfile	2	TRUE	0.00187344	886.247
rs3767952	A	G	A	G	0.0134472	0.0408093	0.226709	0.230198	FALSE	FALSE	FALSE	0.119828	0.733431	314395	MARGINAL	TRUE	reported	0.00238826	1.8e-08	472174	TL	TRUE	reported	textfile	2	TRUE	6.71381e-05	31.7029
rs3785074	G	A	G	A	0.023863	-0.251987	0.289672	0.168317	FALSE	FALSE	FALSE	0.122745	0.0400793	314395	MARGINAL	TRUE	reported	0.00220455	2.6e-27	472174	TL	TRUE	reported	textfile	2	TRUE	0.000248085	117.168
rs3891167	G	A	G	A	-0.0425685	0.217292	0.253435	0.296738	FALSE	FALSE	FALSE	0.115654	0.0602698	314395	MARGINAL	TRUE	reported	0.00239551	1.2e-70	472174	TL	TRUE	reported	textfile	2	TRUE	0.000668326	315.776
rs41269079	A	T	A	T	0.0153617	0.177291	0.188991	0.238517	FALSE	TRUE	FALSE	0.122289	0.147125	314395	MARGINAL	TRUE	reported	0.0025499	1.7e-09	472174	TL	TRUE	reported	textfile	2	TRUE	7.68594e-05	36.2936
rs41304832	A	G	A	G	0.0611702	-0.280488	0.012378	0.0272763	FALSE	FALSE	FALSE	0.264858	0.289594	314395	MARGINAL	TRUE	reported	0.0093095	5e-11	472174	TL	TRUE	reported	textfile	2	TRUE	9.14293e-05	43.1743
rs429358	C	T	C	T	0.0173498	0.139085	0.153969	0.19802	FALSE	FALSE	FALSE	0.130796	0.287613	314395	MARGINAL	TRUE	reported	0.00277091	3.8e-10	472174	TL	TRUE	reported	textfile	2	TRUE	8.30244e-05	39.2051
rs4498805	T	G	T	G	0.0150601	0.00764395	0.546632	0.511308	FALSE	FALSE	FALSE	0.0994684	0.938744	314395	MARGINAL	TRUE	reported	0.00200376	5.7e-14	472174	TL	TRUE	reported	textfile	2	TRUE	0.000119622	56.4888
rs4530278	T	G	T	G	0.0138793	0.167277	0.59815	0.642157	FALSE	FALSE	FALSE	0.102082	0.101284	314395	MARGINAL	TRUE	reported	0.0020567	1.5e-11	472174	TL	TRUE	reported	textfile	2	TRUE	9.64382e-05	45.5398
rs45604339	T	C	T	C	-0.020433	-0.154056	0.34242	0.349194	FALSE	FALSE	FALSE	0.102513	0.132893	314395	MARGINAL	TRUE	reported	0.00211433	4.3e-22	472174	TL	TRUE	reported	textfile	2	TRUE	0.000197756	93.3936
rs4695407	G	A	G	A	0.0141511	-0.119252	0.507843	0.436954	FALSE	FALSE	FALSE	0.100379	0.234827	314395	MARGINAL	TRUE	reported	0.00199925	1.5e-12	472174	TL	TRUE	reported	textfile	2	TRUE	0.000106096	50.1008
rs4724	A	G	A	G	-0.0547446	-0.146977	0.116598	0.0939526	FALSE	FALSE	FALSE	0.161174	0.361814	314395	MARGINAL	TRUE	reported	0.00312441	9.8e-69	472174	TL	TRUE	reported	textfile	2	TRUE	0.000649774	307.004
rs4731541	G	C	G	C	-0.0206119	0.0057006	0.624901	0.641186	FALSE	TRUE	FALSE	0.104493	0.956493	314395	MARGINAL	TRUE	reported	0.00205962	1.4e-23	472174	TL	TRUE	reported	textfile	2	TRUE	0.000212064	100.152
rs4743037	T	C	T	C	0.0147971	0.0141864	0.230874	0.220297	FALSE	FALSE	FALSE	0.121441	0.907005	314395	MARGINAL	TRUE	reported	0.00238094	5.1e-10	472174	TL	TRUE	reported	textfile	2	TRUE	8.17935e-05	38.6238
rs55747751	A	G	A	G	-0.0211612	0.00776938	0.077375	0.0570569	FALSE	FALSE	FALSE	0.21733	0.971482	314395	MARGINAL	TRUE	reported	0.00375164	1.7e-08	472174	TL	TRUE	reported	textfile	2	TRUE	6.73763e-05	31.8153
rs56799554	G	A	G	A	-0.0259793	-0.0688857	0.170183	0.221074	FALSE	FALSE	FALSE	0.118947	0.562501	314395	MARGINAL	TRUE	reported	0.00267858	3e-22	472174	TL	TRUE	reported	textfile	2	TRUE	0.000199185	94.0684
rs5742915	C	T	C	T	0.0193377	0.0619886	0.445829	0.423296	FALSE	FALSE	FALSE	0.10151	0.541422	314395	MARGINAL	TRUE	reported	0.00202886	1.6e-21	472174	TL	TRUE	reported	textfile	2	TRUE	0.000192362	90.8455
rs59409453	G	A	G	A	0.0202133	0.160563	0.730602	0.818433	FALSE	FALSE	FALSE	0.123264	0.192712	314395	MARGINAL	TRUE	reported	0.00230175	1.6e-18	472174	TL	TRUE	reported	textfile	2	TRUE	0.0001633	77.1181
rs6007020	C	T	C	T	0.0144904	-0.0908636	0.367823	0.337342	FALSE	FALSE	FALSE	0.104042	0.38248	314395	MARGINAL	TRUE	reported	0.00209637	4.8e-12	472174	TL	TRUE	reported	textfile	2	TRUE	0.000101176	47.7775
rs6054257	A	G	A	G	-0.0141684	0.0848085	0.793522	0.816016	FALSE	FALSE	FALSE	0.125988	0.500854	314395	MARGINAL	TRUE	reported	0.00247729	1.1e-08	472174	TL	TRUE	reported	textfile	2	TRUE	6.92717e-05	32.7104
rs61748181	T	C	T	C	-0.059181	-0.265905	0.028928	0.0421374	FALSE	FALSE	FALSE	0.218589	0.223809	314395	MARGINAL	TRUE	reported	0.00595394	2.8e-23	472174	TL	TRUE	reported	textfile	2	TRUE	0.000209201	98.7993
rs6536702	A	G	A	G	0.0534148	-0.103684	0.774647	0.799136	FALSE	FALSE	FALSE	0.128391	0.419342	314395	MARGINAL	TRUE	reported	0.00238875	9.4e-111	472174	TL	TRUE	reported	textfile	2	TRUE	0.00105784	500.011
rs6584579	G	A	G	A	0.0114923	-0.079111	0.398876	0.307901	FALSE	FALSE	FALSE	0.106489	0.457542	314395	MARGINAL	TRUE	reported	0.00204674	2e-08	472174	TL	TRUE	reported	textfile	2	TRUE	6.67663e-05	31.5273
rs6587577	G	A	G	A	-0.0182148	-0.0588061	0.826346	0.832838	FALSE	FALSE	FALSE	0.136504	0.666613	314395	MARGINAL	TRUE	reported	0.0026359	4.8e-12	472174	TL	TRUE	reported	textfile	2	TRUE	0.000101122	47.7517
rs6659669	T	C	T	C	-0.0117091	-0.158129	0.605095	0.544554	FALSE	FALSE	FALSE	0.10135	0.118706	314395	MARGINAL	TRUE	reported	0.00205167	1.1e-08	472174	TL	TRUE	reported	textfile	2	TRUE	6.89763e-05	32.5709
rs6669563	A	G	A	G	0.0182358	0.0371827	0.437768	0.476451	FALSE	FALSE	FALSE	0.100275	0.71078	314395	MARGINAL	TRUE	reported	0.00202476	2.1e-19	472174	TL	TRUE	reported	textfile	2	TRUE	0.000171762	81.1149
rs66731853	A	G	A	G	-0.0177791	-0.0763691	0.317304	0.180722	FALSE	FALSE	FALSE	0.12668	0.546608	314395	MARGINAL	TRUE	reported	0.00215421	1.5e-16	472174	TL	TRUE	reported	textfile	2	TRUE	0.000144238	68.1148
rs6751209	C	T	C	T	-0.0140465	0.0153353	0.204231	0.180771	FALSE	FALSE	FALSE	0.130559	0.906497	314395	MARGINAL	TRUE	reported	0.00248465	1.6e-08	472174	TL	TRUE	reported	textfile	2	TRUE	6.76822e-05	31.9598
rs6776756	A	G	A	G	-0.0174439	0.0561253	0.597562	0.54999	FALSE	FALSE	FALSE	0.101056	0.578627	314395	MARGINAL	TRUE	reported	0.00203747	1.1e-17	472174	TL	TRUE	reported	textfile	2	TRUE	0.000155216	73.2998
rs6881568	A	C	A	C	0.0169256	0.212407	0.36258	0.314386	FALSE	FALSE	FALSE	0.111893	0.0576554	314395	MARGINAL	TRUE	reported	0.00207735	3.7e-16	472174	TL	TRUE	reported	textfile	2	TRUE	0.000140574	66.3845
rs7099229	A	G	A	G	-0.0153288	-0.165955	0.273301	0.157717	FALSE	FALSE	FALSE	0.130435	0.203259	314395	MARGINAL	TRUE	reported	0.00224403	8.4e-12	472174	TL	TRUE	reported	textfile	2	TRUE	9.8813e-05	46.6613
rs7164950	G	A	G	A	0.0129362	-0.136058	0.405979	0.393118	FALSE	FALSE	FALSE	0.101704	0.180966	314395	MARGINAL	TRUE	reported	0.00204001	2.3e-10	472174	TL	TRUE	reported	textfile	2	TRUE	8.51549e-05	40.2112
rs7209057	A	G	A	G	0.011819	-0.0345674	0.561044	0.545011	FALSE	FALSE	FALSE	0.10026	0.730261	314395	MARGINAL	TRUE	reported	0.00202865	5.7e-09	472174	TL	TRUE	reported	textfile	2	TRUE	7.1881e-05	33.9426
rs7221585	T	C	T	C	0.0143271	-0.0404587	0.22401	0.274704	FALSE	FALSE	FALSE	0.110324	0.713822	314395	MARGINAL	TRUE	reported	0.00247042	6.7e-09	472174	TL	TRUE	reported	textfile	2	TRUE	7.12266e-05	33.6336
rs73581419	T	C	T	C	0.0229838	-0.149498	0.106605	0.0706465	FALSE	FALSE	FALSE	0.182824	0.413519	314395	MARGINAL	TRUE	reported	0.00324156	1.3e-12	472174	TL	TRUE	reported	textfile	2	TRUE	0.00010646	50.2729
rs75664430	G	C	G	C	-0.0235179	-0.0849977	0.248028	0.178247	FALSE	TRUE	FALSE	0.126866	0.50287	314395	MARGINAL	TRUE	reported	0.0023186	3.6e-24	472174	TL	TRUE	reported	textfile	2	TRUE	0.000217846	102.883
rs76065543	T	C	T	C	0.0342843	0.114826	0.137527	0.200524	FALSE	FALSE	FALSE	0.12865	0.372099	314395	MARGINAL	TRUE	reported	0.00290708	4.2e-32	472174	TL	TRUE	reported	textfile	2	TRUE	0.000294474	139.083
rs76094497	A	G	A	G	0.0278689	-0.138772	0.051569	0.0216366	FALSE	FALSE	FALSE	0.319032	0.66358	314395	MARGINAL	TRUE	reported	0.00461731	1.6e-09	472174	TL	TRUE	reported	textfile	2	TRUE	7.71482e-05	36.43
rs76219171	A	G	A	G	0.0359839	-0.230474	0.058433	0.0272277	FALSE	FALSE	FALSE	0.272436	0.397567	314395	MARGINAL	TRUE	reported	0.00431741	7.8e-17	472174	TL	TRUE	reported	textfile	2	TRUE	0.000147097	69.4653
rs762679	A	T	A	T	0.0310104	0.0957819	0.856501	0.84272	FALSE	TRUE	FALSE	0.133006	0.471444	314395	MARGINAL	TRUE	reported	0.00285024	1.4e-27	472174	TL	TRUE	reported	textfile	2	TRUE	0.000250635	118.372
rs76666449	C	T	C	T	0.0295125	-0.161588	0.100625	0.118812	FALSE	FALSE	FALSE	0.143858	0.261333	314395	MARGINAL	TRUE	reported	0.00333186	8.2e-19	472174	TL	TRUE	reported	textfile	2	TRUE	0.000166136	78.4579
rs77231040	C	G	C	G	0.0989303	0.333086	0.005742	0.0346535	FALSE	TRUE	FALSE	0.313495	0.288014	314395	MARGINAL	TRUE	reported	0.0134649	2e-13	472174	TL	TRUE	reported	textfile	2	TRUE	0.000114314	53.9822
rs7726159	A	C	A	C	0.0707719	0.198656	0.327295	0.37052	FALSE	FALSE	FALSE	0.106683	0.0625878	314395	MARGINAL	TRUE	reported	0.0021282	1e-200	472174	TL	TRUE	reported	textfile	2	TRUE	0.00233657	1105.85
rs7772289	T	G	T	G	0.017549	-0.27019	0.503081	0.542846	FALSE	FALSE	FALSE	0.0950759	0.00448559	314395	MARGINAL	TRUE	reported	0.00200003	1.7e-18	472174	TL	TRUE	reported	textfile	2	TRUE	0.000163027	76.9892
rs77732866	A	G	A	G	0.0177942	0.199803	0.137597	0.165842	FALSE	FALSE	FALSE	0.142711	0.161497	314395	MARGINAL	TRUE	reported	0.00290595	9.2e-10	472174	TL	TRUE	reported	textfile	2	TRUE	7.94043e-05	37.4955
rs7790856	T	C	T	C	-0.0437199	0.0666545	0.289139	0.235149	FALSE	FALSE	FALSE	0.119425	0.576756	314395	MARGINAL	TRUE	reported	0.00220526	1.8e-87	472174	TL	TRUE	reported	textfile	2	TRUE	0.000831716	393.04
rs78491606	C	A	C	A	-0.0756311	-0.0577505	0.018433	0.0272277	FALSE	FALSE	FALSE	0.299688	0.847192	314395	MARGINAL	TRUE	reported	0.00741168	1.9e-24	472174	TL	TRUE	reported	textfile	2	TRUE	0.00022048	104.128
rs79977579	A	C	A	C	0.0281517	-0.308439	0.09555	0.0687536	FALSE	FALSE	FALSE	0.171903	0.0727713	314395	MARGINAL	TRUE	reported	0.00343182	2.3e-16	472174	TL	TRUE	reported	textfile	2	TRUE	0.000142494	67.2912
rs80116508	A	G	A	G	-0.0352672	0.252317	0.062356	0.0965347	FALSE	FALSE	FALSE	0.185534	0.173845	314395	MARGINAL	TRUE	reported	0.00415151	2e-17	472174	TL	TRUE	reported	textfile	2	TRUE	0.000152813	72.1652
rs80324517	A	G	A	G	0.0396515	0.216131	0.048259	0.0755484	FALSE	FALSE	FALSE	0.206005	0.294105	314395	MARGINAL	TRUE	reported	0.00466286	1.8e-17	472174	TL	TRUE	reported	textfile	2	TRUE	0.000153125	72.3124
rs8102497	A	G	A	G	-0.0149654	0.0156548	0.431828	0.459299	FALSE	FALSE	FALSE	0.100299	0.875969	314395	MARGINAL	TRUE	reported	0.0020233	1.4e-13	472174	TL	TRUE	reported	textfile	2	TRUE	0.000115852	54.7084
rs8105767	G	A	G	A	0.0328384	0.0563895	0.29467	0.330868	FALSE	FALSE	FALSE	0.107413	0.599599	314395	MARGINAL	TRUE	reported	0.00220117	2.5e-50	472174	TL	TRUE	reported	textfile	2	TRUE	0.00047114	222.564
rs869785	C	T	C	T	-0.0147303	0.221812	0.672471	0.709066	FALSE	FALSE	FALSE	0.105662	0.0357948	314395	MARGINAL	TRUE	reported	0.00212801	4.4e-12	472174	TL	TRUE	reported	textfile	2	TRUE	0.000101468	47.9153
rs871134	T	C	T	C	-0.0182986	-0.00268832	0.569032	0.556931	FALSE	FALSE	FALSE	0.100934	0.978751	314395	MARGINAL	TRUE	reported	0.0020263	1.7e-19	472174	TL	TRUE	reported	textfile	2	TRUE	0.000172684	81.5505
rs932002	T	C	T	C	-0.0402052	-0.0119193	0.150843	0.235149	FALSE	FALSE	FALSE	0.117287	0.919054	314395	MARGINAL	TRUE	reported	0.00279667	7.3e-47	472174	TL	TRUE	reported	textfile	2	TRUE	0.000437512	206.671
rs9398196	G	A	G	A	-0.0143586	0.124786	0.52005	0.648544	FALSE	FALSE	FALSE	0.103596	0.228382	314395	MARGINAL	TRUE	reported	0.00201175	9.5e-13	472174	TL	TRUE	reported	textfile	2	TRUE	0.000107877	50.9418
rs939916	A	G	A	G	0.0241795	-0.0449268	0.669967	0.725092	FALSE	FALSE	FALSE	0.112889	0.690648	314395	MARGINAL	TRUE	reported	0.00216724	6.6e-29	472174	TL	TRUE	reported	textfile	2	TRUE	0.000263551	124.474
rs9419958	C	T	C	T	-0.0810098	-0.0431658	0.86139	0.88111	FALSE	FALSE	FALSE	0.157122	0.783525	314395	MARGINAL	TRUE	reported	0.00293847	2.6e-167	472174	TL	TRUE	reported	textfile	2	TRUE	0.00160706	760.03
rs9600019	T	C	T	C	0.0127134	0.0116005	0.335579	0.37747	FALSE	FALSE	FALSE	0.103452	0.910717	314395	MARGINAL	TRUE	reported	0.00213096	2.4e-09	472174	TL	TRUE	reported	textfile	2	TRUE	7.53769e-05	35.5935
rs9878436	T	C	T	C	-0.0143407	0.109231	0.434393	0.377538	FALSE	FALSE	FALSE	0.104218	0.294593	314395	MARGINAL	TRUE	reported	0.00201819	1.2e-12	472174	TL	TRUE	reported	textfile	2	TRUE	0.000106922	50.4911
rs9955360	A	C	A	C	-0.0190311	-0.147875	0.869288	0.835022	FALSE	FALSE	FALSE	0.141926	0.297451	314395	MARGINAL	TRUE	reported	0.00299791	2.2e-10	472174	TL	TRUE	reported	textfile	2	TRUE	8.53398e-05	40.2985

## Sheet: follicular lymphoma
SNP	effect_allele.exposure	other_allele.exposure	effect_allele.outcome	other_allele.outcome	beta.exposure	beta.outcome	eaf.exposure	eaf.outcome	remove	palindromic	ambiguous	se.outcome	pval.outcome	samplesize.outcome	outcome	mr_keep.outcome	pval_origin.outcome	se.exposure	pval.exposure	samplesize.exposure	exposure	mr_keep.exposure	pval_origin.exposure	data_source.exposure	action	mr_keep	R2	F
rs1003322	A	C	A	C	0.0141734	0.150108	0.213742	0.163755	FALSE	FALSE	FALSE	0.0567223	0.00813598	325831	FOLLICULAR	TRUE	reported	0.00247546	1e-08	472174	TL	TRUE	reported	textfile	2	TRUE	6.94231e-05	32.7819
rs10112752	A	G	A	G	-0.0287522	9.71067e-05	0.430369	0.4486	FALSE	FALSE	FALSE	0.0418152	0.998147	325831	FOLLICULAR	TRUE	reported	0.00202518	9.5e-46	472174	TL	TRUE	reported	textfile	2	TRUE	0.000426705	201.564
rs1023767	A	G	A	G	-0.0183732	-0.1005	0.237595	0.350094	FALSE	FALSE	FALSE	0.042837	0.018971	325831	FOLLICULAR	TRUE	reported	0.00234772	5e-15	472174	TL	TRUE	reported	textfile	2	TRUE	0.000129694	61.2456
rs10768683	G	C	G	C	0.0469922	0.0986107	0.841033	0.809077	FALSE	TRUE	FALSE	0.051527	0.0556493	325831	FOLLICULAR	TRUE	reported	0.00277015	1.5e-64	472174	TL	TRUE	reported	textfile	2	TRUE	0.000609086	287.768
rs10773176	G	A	G	A	-0.0172009	0.0283252	0.741214	0.812274	FALSE	FALSE	FALSE	0.0527642	0.591389	325831	FOLLICULAR	TRUE	reported	0.00228534	5.2e-14	472174	TL	TRUE	reported	textfile	2	TRUE	0.000119963	56.6499
rs10774624	A	G	A	G	0.0149944	-0.00762102	0.53276	0.598522	FALSE	FALSE	FALSE	0.0424858	0.857641	325831	FOLLICULAR	TRUE	reported	0.00205494	2.9e-13	472174	TL	TRUE	reported	textfile	2	TRUE	0.000112748	53.2425
rs10805346	C	T	C	T	0.0117072	0.0339514	0.439339	0.459873	FALSE	FALSE	FALSE	0.0418674	0.417408	325831	FOLLICULAR	TRUE	reported	0.00202147	7e-09	472174	TL	TRUE	reported	textfile	2	TRUE	7.10295e-05	33.5405
rs10840270	G	C	G	C	0.014383	0.0555169	0.655684	0.675484	FALSE	TRUE	FALSE	0.0440337	0.207387	325831	FOLLICULAR	TRUE	reported	0.00212494	1.3e-11	472174	TL	TRUE	reported	textfile	2	TRUE	9.702e-05	45.8146
rs10845387	A	G	A	G	-0.0141214	-0.00912684	0.352666	0.344882	FALSE	FALSE	FALSE	0.044567	0.837737	325831	FOLLICULAR	TRUE	reported	0.00209396	1.5e-11	472174	TL	TRUE	reported	textfile	2	TRUE	9.63108e-05	45.4796
rs10905255	T	G	T	G	-0.0182493	0.000627412	0.57919	0.559237	FALSE	FALSE	FALSE	0.0419529	0.988068	325831	FOLLICULAR	TRUE	reported	0.00203099	2.6e-19	472174	TL	TRUE	reported	textfile	2	TRUE	0.000170962	80.7374
rs10936598	C	A	C	A	-0.0656433	-0.0945405	0.32379	0.327287	FALSE	FALSE	FALSE	0.043536	0.0298896	325831	FOLLICULAR	TRUE	reported	0.00214663	1e-200	472174	TL	TRUE	reported	textfile	2	TRUE	0.00197654	935.114
rs11085072	T	C	T	C	-0.0131806	0.0121155	0.236909	0.162843	FALSE	FALSE	FALSE	0.0567289	0.830884	325831	FOLLICULAR	TRUE	reported	0.00236713	2.6e-08	472174	TL	TRUE	reported	textfile	2	TRUE	6.56592e-05	31.0045
rs11117354	C	T	C	T	0.0232506	-0.0174294	0.696513	0.574135	FALSE	FALSE	FALSE	0.042023	0.678319	325831	FOLLICULAR	TRUE	reported	0.00219601	3.4e-26	472174	TL	TRUE	reported	textfile	2	TRUE	0.000237353	112.098
rs111527438	C	T	C	T	0.0125	0.021934	0.351251	0.327941	FALSE	FALSE	FALSE	0.0444551	0.621733	325831	FOLLICULAR	TRUE	reported	0.00211016	3.1e-09	472174	TL	TRUE	reported	textfile	2	TRUE	7.43113e-05	35.0903
rs111950327	C	G	C	G	0.0238271	0.053898	0.063628	0.0550431	FALSE	TRUE	FALSE	0.0927437	0.56114	325831	FOLLICULAR	TRUE	reported	0.00409406	5.9e-09	472174	TL	TRUE	reported	textfile	2	TRUE	7.173e-05	33.8713
rs112394943	C	T	C	T	-0.0198961	-0.0786094	0.162741	0.223129	FALSE	FALSE	FALSE	0.0496588	0.113424	325831	FOLLICULAR	TRUE	reported	0.00281641	1.6e-12	472174	TL	TRUE	reported	textfile	2	TRUE	0.000105681	49.9048
rs113525195	A	C	A	C	-0.0124075	0.0945338	0.290254	0.321947	FALSE	FALSE	FALSE	0.0452552	0.0367164	325831	FOLLICULAR	TRUE	reported	0.00224132	3.1e-08	472174	TL	TRUE	reported	textfile	2	TRUE	6.48979e-05	30.645
rs11557154	T	C	T	C	-0.0343719	0.05705	0.13003	0.136393	FALSE	FALSE	FALSE	0.0617977	0.355917	325831	FOLLICULAR	TRUE	reported	0.00298538	1.1e-30	472174	TL	TRUE	reported	textfile	2	TRUE	0.000280662	132.558
rs11579626	C	A	C	A	0.0265113	0.0337764	0.084882	0.124934	FALSE	FALSE	FALSE	0.0635659	0.59517	325831	FOLLICULAR	TRUE	reported	0.00357752	1.3e-13	472174	TL	TRUE	reported	textfile	2	TRUE	0.000116291	54.9156
rs11584821	T	C	T	C	-0.0306517	0.0670288	0.176208	0.191184	FALSE	FALSE	FALSE	0.0539189	0.213816	325831	FOLLICULAR	TRUE	reported	0.00263623	3e-31	472174	TL	TRUE	reported	textfile	2	TRUE	0.000286231	135.189
rs116863223	A	G	A	G	-0.0817874	0.0167938	0.011763	0.015683	FALSE	FALSE	FALSE	0.168139	0.920439	325831	FOLLICULAR	TRUE	reported	0.00937157	2.6e-18	472174	TL	TRUE	reported	textfile	2	TRUE	0.000161278	76.1634
rs11699829	A	G	A	G	0.0641957	-0.117753	0.034146	0.0139314	FALSE	FALSE	FALSE	0.171108	0.491341	325831	FOLLICULAR	TRUE	reported	0.00602028	1.5e-26	472174	TL	TRUE	reported	textfile	2	TRUE	0.000240753	113.704
rs117034449	A	G	A	G	0.0374377	-0.0635868	0.023304	0.0148395	FALSE	FALSE	FALSE	0.167904	0.704904	325831	FOLLICULAR	TRUE	reported	0.00667898	2.1e-08	472174	TL	TRUE	reported	textfile	2	TRUE	6.65376e-05	31.4193
rs117407747	T	C	T	C	0.0450533	0.377442	0.027571	0.0145075	FALSE	FALSE	FALSE	0.20467	0.0651613	325831	FOLLICULAR	TRUE	reported	0.00611706	1.8e-13	472174	TL	TRUE	reported	textfile	2	TRUE	0.000114872	54.2458
rs11746381	C	T	C	T	0.0329955	0.0306848	0.0568	0.0732297	FALSE	FALSE	FALSE	0.0806112	0.703463	325831	FOLLICULAR	TRUE	reported	0.00431036	1.9e-14	472174	TL	TRUE	reported	textfile	2	TRUE	0.000124087	58.5977
rs117512405	A	G	A	G	-0.0790134	0.0755803	0.017043	0.0585496	FALSE	FALSE	FALSE	0.0924747	0.413753	325831	FOLLICULAR	TRUE	reported	0.00824611	9.5e-22	472174	TL	TRUE	reported	textfile	2	TRUE	0.000194409	91.8124
rs117630647	A	G	A	G	0.059565	0.170192	0.021346	0.0190849	FALSE	FALSE	FALSE	0.163909	0.299115	325831	FOLLICULAR	TRUE	reported	0.00720413	1.4e-16	472174	TL	TRUE	reported	textfile	2	TRUE	0.000144762	68.3624
rs11769630	A	T	A	T	-0.0256807	0.00148529	0.072227	0.104851	FALSE	TRUE	FALSE	0.0678212	0.982528	325831	FOLLICULAR	TRUE	reported	0.00389475	4.3e-11	472174	TL	TRUE	reported	textfile	2	TRUE	9.20688e-05	43.4763
rs11991877	A	T	A	T	-0.030138	-0.0917968	0.889309	0.847565	FALSE	TRUE	FALSE	0.059539	0.123124	325831	FOLLICULAR	TRUE	reported	0.00318686	3.2e-21	472174	TL	TRUE	reported	textfile	2	TRUE	0.000189373	89.4337
rs12369950	C	T	C	T	-0.0178308	-0.0620729	0.140675	0.142276	FALSE	FALSE	FALSE	0.058322	0.287186	325831	FOLLICULAR	TRUE	reported	0.00290205	8e-10	472174	TL	TRUE	reported	textfile	2	TRUE	7.99457e-05	37.7511
rs12412214	A	G	A	G	-0.0245174	0.124664	0.279765	0.423661	FALSE	FALSE	FALSE	0.0416037	0.00273124	325831	FOLLICULAR	TRUE	reported	0.00222685	3.4e-28	472174	TL	TRUE	reported	textfile	2	TRUE	0.000256657	121.217
rs12451892	C	T	C	T	-0.0116145	0.0271241	0.380511	0.44207	FALSE	FALSE	FALSE	0.0420347	0.518746	325831	FOLLICULAR	TRUE	reported	0.00207578	2.2e-08	472174	TL	TRUE	reported	textfile	2	TRUE	6.62991e-05	31.3066
rs1291143	C	A	C	A	0.0493145	-0.156831	0.849026	0.747104	FALSE	FALSE	FALSE	0.047914	0.00106343	325831	FOLLICULAR	TRUE	reported	0.0027991	1.8e-69	472174	TL	TRUE	reported	textfile	2	TRUE	0.000656939	310.392
rs12925933	C	A	C	A	-0.0146622	-0.0251625	0.66221	0.536139	FALSE	FALSE	FALSE	0.0418906	0.548059	325831	FOLLICULAR	TRUE	reported	0.00213796	7e-12	472174	TL	TRUE	reported	textfile	2	TRUE	9.95987e-05	47.0324
rs12932179	G	A	G	A	-0.0136257	0.057114	0.561399	0.632254	FALSE	FALSE	FALSE	0.0427807	0.181863	325831	FOLLICULAR	TRUE	reported	0.0020276	1.8e-11	472174	TL	TRUE	reported	textfile	2	TRUE	9.56334e-05	45.1597
rs13062095	C	T	C	T	0.0138552	-0.011722	0.327843	0.370075	FALSE	FALSE	FALSE	0.0430481	0.785391	325831	FOLLICULAR	TRUE	reported	0.00214113	9.7e-11	472174	TL	TRUE	reported	textfile	2	TRUE	8.86745e-05	41.8733
rs131797	T	TAAAAA	T	TAAAAA	0.0243752	0.048044	0.235625	0.189356	FALSE	FALSE	FALSE	0.053992	0.373554	325831	FOLLICULAR	TRUE	reported	0.00236561	6.8e-25	472174	TL	TRUE	reported	textfile	2	TRUE	0.000224807	106.172
rs13230646	C	T	C	T	-0.0173277	-0.0164736	0.248945	0.172388	FALSE	FALSE	FALSE	0.0549374	0.764283	325831	FOLLICULAR	TRUE	reported	0.00232377	8.9e-14	472174	TL	TRUE	reported	textfile	2	TRUE	0.000117745	55.6024
rs1332941	G	A	G	A	0.0256552	0.0104911	0.820466	0.797119	FALSE	FALSE	FALSE	0.0514087	0.838296	325831	FOLLICULAR	TRUE	reported	0.00273159	5.9e-21	472174	TL	TRUE	reported	textfile	2	TRUE	0.000186783	88.21
rs137901416	A	G	A	G	0.04572	0.0108972	0.100311	0.0665936	FALSE	FALSE	FALSE	0.0837662	0.896494	325831	FOLLICULAR	TRUE	reported	0.00332355	4.7e-43	472174	TL	TRUE	reported	textfile	2	TRUE	0.000400619	189.237
rs139669835	T	C	T	C	-0.0612563	0.113834	0.009365	0.00127011	FALSE	FALSE	FALSE	0.620734	0.854495	325831	FOLLICULAR	TRUE	reported	0.0105346	6.1e-09	472174	TL	TRUE	reported	textfile	2	TRUE	7.16032e-05	33.8114
rs139795227	C	A	C	A	0.0599379	0.133463	0.014021	0.0313128	FALSE	FALSE	FALSE	0.126863	0.292787	325831	FOLLICULAR	TRUE	reported	0.00873247	6.7e-12	472174	TL	TRUE	reported	textfile	2	TRUE	9.97662e-05	47.1115
rs141214782	TTATC	T	TTATC	T	-0.0246687	-0.0686371	0.101206	0.0999137	FALSE	FALSE	FALSE	0.0673338	0.308034	325831	FOLLICULAR	TRUE	reported	0.00335723	2e-13	472174	TL	TRUE	reported	textfile	2	TRUE	0.000114335	53.9919
rs142426306	T	C	T	C	-0.0504903	-0.0390883	0.039544	0.0398582	FALSE	FALSE	FALSE	0.105916	0.712089	325831	FOLLICULAR	TRUE	reported	0.00539933	8.7e-21	472174	TL	TRUE	reported	textfile	2	TRUE	0.000185163	87.4449
rs143190905	T	G	T	G	-0.0723995	-0.0255948	0.080404	0.0728595	FALSE	FALSE	FALSE	0.0789472	0.745786	325831	FOLLICULAR	TRUE	reported	0.00369421	1.6e-85	472174	TL	TRUE	reported	textfile	2	TRUE	0.00081278	384.084
rs144204502	T	C	T	C	-0.100574	0.201146	0.012562	0.0448772	FALSE	FALSE	FALSE	0.109066	0.0651448	325831	FOLLICULAR	TRUE	reported	0.00913369	3.4e-28	472174	TL	TRUE	reported	textfile	2	TRUE	0.000256723	121.249
rs145114957	G	C	G	C	0.0272605	-0.0493901	0.042648	0.0376285	FALSE	TRUE	FALSE	0.106465	0.642713	325831	FOLLICULAR	TRUE	reported	0.00498872	4.6e-08	472174	TL	TRUE	reported	textfile	2	TRUE	6.32353e-05	29.8598
rs150150565	T	C	T	C	0.063762	0.0330916	0.021455	0.0186847	FALSE	FALSE	FALSE	0.156	0.832009	325831	FOLLICULAR	TRUE	reported	0.00739877	6.8e-18	472174	TL	TRUE	reported	textfile	2	TRUE	0.000157266	74.2682
rs16978028	T	A	T	A	-0.029945	0.0174168	0.143727	0.0825223	FALSE	TRUE	FALSE	0.0759646	0.818654	325831	FOLLICULAR	TRUE	reported	0.00285068	8.2e-26	472174	TL	TRUE	reported	textfile	2	TRUE	0.000233641	110.344
rs17445108	A	G	A	G	-0.0168922	-0.124376	0.12695	0.113453	FALSE	FALSE	FALSE	0.063097	0.0487024	325831	FOLLICULAR	TRUE	reported	0.00300983	2e-08	472174	TL	TRUE	reported	textfile	2	TRUE	6.67049e-05	31.4983
rs17677991	G	C	G	C	0.0222664	0.00802898	0.342123	0.397757	FALSE	TRUE	FALSE	0.0423195	0.849526	325831	FOLLICULAR	TRUE	reported	0.00210806	4.4e-26	472174	TL	TRUE	reported	textfile	2	TRUE	0.000236227	111.566
rs182059586	C	T	C	T	-0.0571159	-0.247921	0.02511	0.00533114	FALSE	FALSE	FALSE	0.249124	0.319652	325831	FOLLICULAR	TRUE	reported	0.00680853	4.9e-17	472174	TL	TRUE	reported	textfile	2	TRUE	0.000149019	70.3729
rs185174247	A	G	A	G	0.0372806	0.0254539	0.05609	0.03116	FALSE	FALSE	FALSE	0.121006	0.833393	325831	FOLLICULAR	TRUE	reported	0.00435145	1.1e-17	472174	TL	TRUE	reported	textfile	2	TRUE	0.000155428	73.4
rs188918174	T	C	T	C	0.0403062	-0.107304	0.036106	0.0419153	FALSE	FALSE	FALSE	0.099414	0.280425	325831	FOLLICULAR	TRUE	reported	0.00543604	1.2e-13	472174	TL	TRUE	reported	textfile	2	TRUE	0.00011642	54.9764
rs1907702	A	G	A	G	0.0150247	-0.0871371	0.766771	0.785727	FALSE	FALSE	FALSE	0.0518568	0.0928902	325831	FOLLICULAR	TRUE	reported	0.00242651	5.9e-10	472174	TL	TRUE	reported	textfile	2	TRUE	8.11914e-05	38.3394
rs1957937	T	A	T	A	0.0209365	-0.107197	0.16018	0.169833	FALSE	TRUE	FALSE	0.0532218	0.0439937	325831	FOLLICULAR	TRUE	reported	0.00273361	1.9e-14	472174	TL	TRUE	reported	textfile	2	TRUE	0.000124216	58.6588
rs1985369	G	A	G	A	-0.0311893	0.0376027	0.868178	0.894566	FALSE	FALSE	FALSE	0.067031	0.574815	325831	FOLLICULAR	TRUE	reported	0.00300952	3.6e-25	472174	TL	TRUE	reported	textfile	2	TRUE	0.000227413	107.403
rs201009932	T	TA	T	TA	0.0769296	-0.308906	0.991068	0.969856	FALSE	FALSE	FALSE	0.139067	0.0263324	325831	FOLLICULAR	TRUE	reported	0.0116209	3.6e-11	472174	TL	TRUE	reported	textfile	2	TRUE	9.28036e-05	43.8234
rs2056726	A	G	A	G	-0.0228078	-0.04235	0.214376	0.220103	FALSE	FALSE	FALSE	0.0496438	0.393617	325831	FOLLICULAR	TRUE	reported	0.00243638	7.9e-21	472174	TL	TRUE	reported	textfile	2	TRUE	0.000185564	87.6345
rs2230590	C	T	C	T	-0.0158022	0.00420795	0.510897	0.395004	FALSE	FALSE	FALSE	0.0424485	0.921035	325831	FOLLICULAR	TRUE	reported	0.00200806	3.6e-15	472174	TL	TRUE	reported	textfile	2	TRUE	0.000131136	61.927
rs2282764	G	A	G	A	-0.0224234	0.0228166	0.142384	0.144243	FALSE	FALSE	FALSE	0.0596401	0.702039	325831	FOLLICULAR	TRUE	reported	0.00289392	9.3e-15	472174	TL	TRUE	reported	textfile	2	TRUE	0.000127137	60.0383
rs2293579	A	G	A	G	-0.012915	-0.0954628	0.386274	0.273417	FALSE	FALSE	FALSE	0.0454903	0.0358583	325831	FOLLICULAR	TRUE	reported	0.00205481	3.3e-10	472174	TL	TRUE	reported	textfile	2	TRUE	8.36579e-05	39.5042
rs2538745	C	T	C	T	-0.012942	-0.0310362	0.602841	0.521638	FALSE	FALSE	FALSE	0.0415361	0.454936	325831	FOLLICULAR	TRUE	reported	0.002056	3.1e-10	472174	TL	TRUE	reported	textfile	2	TRUE	8.39108e-05	39.6237
rs2555104	C	A	C	A	-0.0139717	-0.0323613	0.434255	0.472499	FALSE	FALSE	FALSE	0.0415194	0.43573	325831	FOLLICULAR	TRUE	reported	0.00203498	6.6e-12	472174	TL	TRUE	reported	textfile	2	TRUE	9.98235e-05	47.1386
rs2763979	T	C	T	C	-0.0277713	0.210373	0.359721	0.490262	FALSE	FALSE	FALSE	0.0408153	2.54642e-07	325831	FOLLICULAR	TRUE	reported	0.00208092	1.3e-40	472174	TL	TRUE	reported	textfile	2	TRUE	0.000377065	178.107
rs28502153	A	C	A	C	-0.0215916	0.0235246	0.377958	0.376954	FALSE	FALSE	FALSE	0.0430581	0.584829	325831	FOLLICULAR	TRUE	reported	0.00206208	1.2e-25	472174	TL	TRUE	reported	textfile	2	TRUE	0.000232143	109.637
rs28577594	C	G	C	G	0.0187657	0.0703217	0.709829	0.722905	FALSE	TRUE	FALSE	0.0458939	0.125456	325831	FOLLICULAR	TRUE	reported	0.00224024	5.4e-17	472174	TL	TRUE	reported	textfile	2	TRUE	0.000148585	70.1679
rs2967355	C	A	C	A	-0.0461595	-0.0629189	0.774276	0.817951	FALSE	FALSE	FALSE	0.0548402	0.251252	325831	FOLLICULAR	TRUE	reported	0.00238972	4e-83	472174	TL	TRUE	reported	textfile	2	TRUE	0.000789556	373.101
rs2977608	C	A	C	A	0.0129483	-0.00854001	0.743949	0.688611	FALSE	FALSE	FALSE	0.0450891	0.849777	325831	FOLLICULAR	TRUE	reported	0.00233716	3e-08	472174	TL	TRUE	reported	textfile	2	TRUE	6.50007e-05	30.6935
rs3093888	A	G	A	G	-0.028973	0.0204898	0.05131	0.0907058	FALSE	FALSE	FALSE	0.0726353	0.777874	325831	FOLLICULAR	TRUE	reported	0.00452459	1.5e-10	472174	TL	TRUE	reported	textfile	2	TRUE	8.68338e-05	41.004
rs35640778	A	G	A	G	-0.209011	0.00827808	0.020757	0.0137819	FALSE	FALSE	FALSE	0.179532	0.963223	325831	FOLLICULAR	TRUE	reported	0.00702087	9.59e-195	472174	TL	TRUE	reported	textfile	2	TRUE	0.00187344	886.247
rs3767952	A	G	A	G	0.0134472	-0.00466852	0.226709	0.220976	FALSE	FALSE	FALSE	0.0498292	0.925355	325831	FOLLICULAR	TRUE	reported	0.00238826	1.8e-08	472174	TL	TRUE	reported	textfile	2	TRUE	6.71381e-05	31.7029
rs3785074	G	A	G	A	0.023863	0.0751305	0.289672	0.219412	FALSE	FALSE	FALSE	0.0512361	0.142551	325831	FOLLICULAR	TRUE	reported	0.00220455	2.6e-27	472174	TL	TRUE	reported	textfile	2	TRUE	0.000248085	117.168
rs3891167	G	A	G	A	-0.0425685	-0.100239	0.253435	0.236159	FALSE	FALSE	FALSE	0.0481271	0.0372701	325831	FOLLICULAR	TRUE	reported	0.00239551	1.2e-70	472174	TL	TRUE	reported	textfile	2	TRUE	0.000668326	315.776
rs41269079	A	T	A	T	0.0153617	0.00500218	0.188991	0.21001	FALSE	TRUE	FALSE	0.0509997	0.921867	325831	FOLLICULAR	TRUE	reported	0.0025499	1.7e-09	472174	TL	TRUE	reported	textfile	2	TRUE	7.68594e-05	36.2936
rs41304832	A	G	A	G	0.0611702	-0.0389831	0.012378	0.036199	FALSE	FALSE	FALSE	0.109434	0.721672	325831	FOLLICULAR	TRUE	reported	0.0093095	5e-11	472174	TL	TRUE	reported	textfile	2	TRUE	9.14293e-05	43.1743
rs429358	C	T	C	T	0.0173498	-0.111702	0.153969	0.161339	FALSE	FALSE	FALSE	0.054626	0.0408705	325831	FOLLICULAR	TRUE	reported	0.00277091	3.8e-10	472174	TL	TRUE	reported	textfile	2	TRUE	8.30244e-05	39.2051
rs4498805	T	G	T	G	0.0150601	0.0341011	0.546632	0.512449	FALSE	FALSE	FALSE	0.0414551	0.410733	325831	FOLLICULAR	TRUE	reported	0.00200376	5.7e-14	472174	TL	TRUE	reported	textfile	2	TRUE	0.000119622	56.4888
rs4530278	T	G	T	G	0.0138793	0.0386456	0.59815	0.612611	FALSE	FALSE	FALSE	0.0424932	0.363111	325831	FOLLICULAR	TRUE	reported	0.0020567	1.5e-11	472174	TL	TRUE	reported	textfile	2	TRUE	9.64382e-05	45.5398
rs45604339	T	C	T	C	-0.020433	-0.0672048	0.34242	0.370841	FALSE	FALSE	FALSE	0.0425389	0.114143	325831	FOLLICULAR	TRUE	reported	0.00211433	4.3e-22	472174	TL	TRUE	reported	textfile	2	TRUE	0.000197756	93.3936
rs4695407	G	A	G	A	0.0141511	-0.0565773	0.507843	0.45421	FALSE	FALSE	FALSE	0.041658	0.174419	325831	FOLLICULAR	TRUE	reported	0.00199925	1.5e-12	472174	TL	TRUE	reported	textfile	2	TRUE	0.000106096	50.1008
rs4724	A	G	A	G	-0.0547446	0.0665509	0.116598	0.113983	FALSE	FALSE	FALSE	0.0669547	0.320238	325831	FOLLICULAR	TRUE	reported	0.00312441	9.8e-69	472174	TL	TRUE	reported	textfile	2	TRUE	0.000649774	307.004
rs4731541	G	C	G	C	-0.0206119	0.00460459	0.624901	0.638244	FALSE	TRUE	FALSE	0.043162	0.915042	325831	FOLLICULAR	TRUE	reported	0.00205962	1.4e-23	472174	TL	TRUE	reported	textfile	2	TRUE	0.000212064	100.152
rs4743037	T	C	T	C	0.0147971	-0.0419201	0.230874	0.209923	FALSE	FALSE	FALSE	0.0504672	0.406178	325831	FOLLICULAR	TRUE	reported	0.00238094	5.1e-10	472174	TL	TRUE	reported	textfile	2	TRUE	8.17935e-05	38.6238
rs55747751	A	G	A	G	-0.0211612	0.0931658	0.077375	0.0608441	FALSE	FALSE	FALSE	0.0906955	0.304308	325831	FOLLICULAR	TRUE	reported	0.00375164	1.7e-08	472174	TL	TRUE	reported	textfile	2	TRUE	6.73763e-05	31.8153
rs56799554	G	A	G	A	-0.0259793	-0.0217687	0.170183	0.23298	FALSE	FALSE	FALSE	0.0491156	0.657611	325831	FOLLICULAR	TRUE	reported	0.00267858	3e-22	472174	TL	TRUE	reported	textfile	2	TRUE	0.000199185	94.0684
rs5742915	C	T	C	T	0.0193377	0.00549415	0.445829	0.411657	FALSE	FALSE	FALSE	0.0421489	0.896289	325831	FOLLICULAR	TRUE	reported	0.00202886	1.6e-21	472174	TL	TRUE	reported	textfile	2	TRUE	0.000192362	90.8455
rs59409453	G	A	G	A	0.0202133	0.0236309	0.730602	0.797531	FALSE	FALSE	FALSE	0.0515636	0.646746	325831	FOLLICULAR	TRUE	reported	0.00230175	1.6e-18	472174	TL	TRUE	reported	textfile	2	TRUE	0.0001633	77.1181
rs6007020	C	T	C	T	0.0144904	-0.0376734	0.367823	0.346103	FALSE	FALSE	FALSE	0.043291	0.384172	325831	FOLLICULAR	TRUE	reported	0.00209637	4.8e-12	472174	TL	TRUE	reported	textfile	2	TRUE	0.000101176	47.7775
rs6054257	A	G	A	G	-0.0141684	-0.147727	0.793522	0.777304	FALSE	FALSE	FALSE	0.0501028	0.00319338	325831	FOLLICULAR	TRUE	reported	0.00247729	1.1e-08	472174	TL	TRUE	reported	textfile	2	TRUE	6.92717e-05	32.7104
rs611646	A	T	A	T	-0.0368309	-0.0180306	0.408685	0.389183	FALSE	TRUE	FALSE	0.0424123	0.670744	325831	FOLLICULAR	TRUE	reported	0.00203547	3.5e-73	472174	TL	TRUE	reported	textfile	2	TRUE	0.000692934	327.411
rs61748181	T	C	T	C	-0.059181	-0.173327	0.028928	0.0469492	FALSE	FALSE	FALSE	0.0908581	0.0564339	325831	FOLLICULAR	TRUE	reported	0.00595394	2.8e-23	472174	TL	TRUE	reported	textfile	2	TRUE	0.000209201	98.7993
rs6536702	A	G	A	G	0.0534148	0.0678007	0.774647	0.825447	FALSE	FALSE	FALSE	0.0535184	0.205202	325831	FOLLICULAR	TRUE	reported	0.00238875	9.4e-111	472174	TL	TRUE	reported	textfile	2	TRUE	0.00105784	500.011
rs6584579	G	A	G	A	0.0114923	0.0113447	0.398876	0.325746	FALSE	FALSE	FALSE	0.044417	0.798404	325831	FOLLICULAR	TRUE	reported	0.00204674	2e-08	472174	TL	TRUE	reported	textfile	2	TRUE	6.67663e-05	31.5273
rs6587577	G	A	G	A	-0.0182148	-0.105195	0.826346	0.829535	FALSE	FALSE	FALSE	0.0570876	0.0653732	325831	FOLLICULAR	TRUE	reported	0.0026359	4.8e-12	472174	TL	TRUE	reported	textfile	2	TRUE	0.000101122	47.7517
rs6659669	T	C	T	C	-0.0117091	-0.0980088	0.605095	0.55969	FALSE	FALSE	FALSE	0.0420295	0.0197056	325831	FOLLICULAR	TRUE	reported	0.00205167	1.1e-08	472174	TL	TRUE	reported	textfile	2	TRUE	6.89763e-05	32.5709
rs6669563	A	G	A	G	0.0182358	0.107313	0.437768	0.496598	FALSE	FALSE	FALSE	0.0417303	0.0101235	325831	FOLLICULAR	TRUE	reported	0.00202476	2.1e-19	472174	TL	TRUE	reported	textfile	2	TRUE	0.000171762	81.1149
rs66731853	A	G	A	G	-0.0177791	0.0398958	0.317304	0.199852	FALSE	FALSE	FALSE	0.0525604	0.447825	325831	FOLLICULAR	TRUE	reported	0.00215421	1.5e-16	472174	TL	TRUE	reported	textfile	2	TRUE	0.000144238	68.1148
rs6751209	C	T	C	T	-0.0140465	-0.0253291	0.204231	0.178448	FALSE	FALSE	FALSE	0.0538375	0.638018	325831	FOLLICULAR	TRUE	reported	0.00248465	1.6e-08	472174	TL	TRUE	reported	textfile	2	TRUE	6.76822e-05	31.9598
rs6776756	A	G	A	G	-0.0174439	0.0926458	0.597562	0.557067	FALSE	FALSE	FALSE	0.0420292	0.0275017	325831	FOLLICULAR	TRUE	reported	0.00203747	1.1e-17	472174	TL	TRUE	reported	textfile	2	TRUE	0.000155216	73.2998
rs6881568	A	C	A	C	0.0169256	0.020635	0.36258	0.275982	FALSE	FALSE	FALSE	0.0466061	0.657944	325831	FOLLICULAR	TRUE	reported	0.00207735	3.7e-16	472174	TL	TRUE	reported	textfile	2	TRUE	0.000140574	66.3845
rs7099229	A	G	A	G	-0.0153288	-0.0453561	0.273301	0.17305	FALSE	FALSE	FALSE	0.0544497	0.404849	325831	FOLLICULAR	TRUE	reported	0.00224403	8.4e-12	472174	TL	TRUE	reported	textfile	2	TRUE	9.8813e-05	46.6613
rs7164950	G	A	G	A	0.0129362	0.0283531	0.405979	0.430204	FALSE	FALSE	FALSE	0.0421381	0.501035	325831	FOLLICULAR	TRUE	reported	0.00204001	2.3e-10	472174	TL	TRUE	reported	textfile	2	TRUE	8.51549e-05	40.2112
rs7209057	A	G	A	G	0.011819	0.0164584	0.561044	0.55457	FALSE	FALSE	FALSE	0.0417611	0.693501	325831	FOLLICULAR	TRUE	reported	0.00202865	5.7e-09	472174	TL	TRUE	reported	textfile	2	TRUE	7.1881e-05	33.9426
rs7221585	T	C	T	C	0.0143271	-0.00427019	0.22401	0.282826	FALSE	FALSE	FALSE	0.0459352	0.925934	325831	FOLLICULAR	TRUE	reported	0.00247042	6.7e-09	472174	TL	TRUE	reported	textfile	2	TRUE	7.12266e-05	33.6336
rs73581419	T	C	T	C	0.0229838	-0.169846	0.106605	0.068825	FALSE	FALSE	FALSE	0.076316	0.0260435	325831	FOLLICULAR	TRUE	reported	0.00324156	1.3e-12	472174	TL	TRUE	reported	textfile	2	TRUE	0.00010646	50.2729
rs75664430	G	C	G	C	-0.0235179	0.0127585	0.248028	0.191645	FALSE	TRUE	FALSE	0.0528491	0.809234	325831	FOLLICULAR	TRUE	reported	0.0023186	3.6e-24	472174	TL	TRUE	reported	textfile	2	TRUE	0.000217846	102.883
rs76065543	T	C	T	C	0.0342843	0.0296952	0.137527	0.188514	FALSE	FALSE	FALSE	0.0533848	0.578041	325831	FOLLICULAR	TRUE	reported	0.00290708	4.2e-32	472174	TL	TRUE	reported	textfile	2	TRUE	0.000294474	139.083
rs76094497	A	G	A	G	0.0278689	-0.120253	0.051569	0.0216334	FALSE	FALSE	FALSE	0.134401	0.370929	325831	FOLLICULAR	TRUE	reported	0.00461731	1.6e-09	472174	TL	TRUE	reported	textfile	2	TRUE	7.71482e-05	36.43
rs76219171	A	G	A	G	0.0359839	-0.145659	0.058433	0.0300593	FALSE	FALSE	FALSE	0.113117	0.197856	325831	FOLLICULAR	TRUE	reported	0.00431741	7.8e-17	472174	TL	TRUE	reported	textfile	2	TRUE	0.000147097	69.4653
rs762679	A	T	A	T	0.0310104	0.0276386	0.856501	0.833498	FALSE	TRUE	FALSE	0.0553195	0.617344	325831	FOLLICULAR	TRUE	reported	0.00285024	1.4e-27	472174	TL	TRUE	reported	textfile	2	TRUE	0.000250635	118.372
rs76666449	C	T	C	T	0.0295125	-0.0681028	0.100625	0.128997	FALSE	FALSE	FALSE	0.0602811	0.258581	325831	FOLLICULAR	TRUE	reported	0.00333186	8.2e-19	472174	TL	TRUE	reported	textfile	2	TRUE	0.000166136	78.4579
rs77231040	C	G	C	G	0.0989303	-0.0274963	0.005742	0.0247746	FALSE	TRUE	FALSE	0.13196	0.834941	325831	FOLLICULAR	TRUE	reported	0.0134649	2e-13	472174	TL	TRUE	reported	textfile	2	TRUE	0.000114314	53.9822
rs7726159	A	C	A	C	0.0707719	0.0161554	0.327295	0.327053	FALSE	FALSE	FALSE	0.0443862	0.715878	325831	FOLLICULAR	TRUE	reported	0.0021282	1e-200	472174	TL	TRUE	reported	textfile	2	TRUE	0.00233657	1105.85
rs7772289	T	G	T	G	0.017549	0.0438544	0.503081	0.628839	FALSE	FALSE	FALSE	0.0426795	0.304171	325831	FOLLICULAR	TRUE	reported	0.00200003	1.7e-18	472174	TL	TRUE	reported	textfile	2	TRUE	0.000163027	76.9892
rs77732866	A	G	A	G	0.0177942	-0.0730851	0.137597	0.133674	FALSE	FALSE	FALSE	0.0593158	0.217899	325831	FOLLICULAR	TRUE	reported	0.00290595	9.2e-10	472174	TL	TRUE	reported	textfile	2	TRUE	7.94043e-05	37.4955
rs7790856	T	C	T	C	-0.0437199	0.0417681	0.289139	0.230094	FALSE	FALSE	FALSE	0.0499053	0.402622	325831	FOLLICULAR	TRUE	reported	0.00220526	1.8e-87	472174	TL	TRUE	reported	textfile	2	TRUE	0.000831716	393.04
rs78491606	C	A	C	A	-0.0756311	-0.187348	0.018433	0.0243313	FALSE	FALSE	FALSE	0.123254	0.128508	325831	FOLLICULAR	TRUE	reported	0.00741168	1.9e-24	472174	TL	TRUE	reported	textfile	2	TRUE	0.00022048	104.128
rs79977579	A	C	A	C	0.0281517	-0.00953804	0.09555	0.0939118	FALSE	FALSE	FALSE	0.0711238	0.89332	325831	FOLLICULAR	TRUE	reported	0.00343182	2.3e-16	472174	TL	TRUE	reported	textfile	2	TRUE	0.000142494	67.2912
rs80116508	A	G	A	G	-0.0352672	0.00450573	0.062356	0.0795853	FALSE	FALSE	FALSE	0.0764613	0.953009	325831	FOLLICULAR	TRUE	reported	0.00415151	2e-17	472174	TL	TRUE	reported	textfile	2	TRUE	0.000152813	72.1652
rs80324517	A	G	A	G	0.0396515	0.00263358	0.048259	0.0631502	FALSE	FALSE	FALSE	0.0855067	0.975429	325831	FOLLICULAR	TRUE	reported	0.00466286	1.8e-17	472174	TL	TRUE	reported	textfile	2	TRUE	0.000153125	72.3124
rs8102497	A	G	A	G	-0.0149654	0.0868439	0.431828	0.472288	FALSE	FALSE	FALSE	0.041745	0.0374938	325831	FOLLICULAR	TRUE	reported	0.0020233	1.4e-13	472174	TL	TRUE	reported	textfile	2	TRUE	0.000115852	54.7084
rs8105767	G	A	G	A	0.0328384	0.051083	0.29467	0.327991	FALSE	FALSE	FALSE	0.0445404	0.251426	325831	FOLLICULAR	TRUE	reported	0.00220117	2.5e-50	472174	TL	TRUE	reported	textfile	2	TRUE	0.00047114	222.564
rs869785	C	T	C	T	-0.0147303	0.0319447	0.672471	0.667334	FALSE	FALSE	FALSE	0.0438588	0.466397	325831	FOLLICULAR	TRUE	reported	0.00212801	4.4e-12	472174	TL	TRUE	reported	textfile	2	TRUE	0.000101468	47.9153
rs871134	T	C	T	C	-0.0182986	4.79523e-06	0.569032	0.555315	FALSE	FALSE	FALSE	0.0417651	0.999908	325831	FOLLICULAR	TRUE	reported	0.0020263	1.7e-19	472174	TL	TRUE	reported	textfile	2	TRUE	0.000172684	81.5505
rs932002	T	C	T	C	-0.0402052	0.0415917	0.150843	0.243003	FALSE	FALSE	FALSE	0.0487726	0.393788	325831	FOLLICULAR	TRUE	reported	0.00279667	7.3e-47	472174	TL	TRUE	reported	textfile	2	TRUE	0.000437512	206.671
rs9398196	G	A	G	A	-0.0143586	-0.0367408	0.52005	0.614493	FALSE	FALSE	FALSE	0.0429262	0.39205	325831	FOLLICULAR	TRUE	reported	0.00201175	9.5e-13	472174	TL	TRUE	reported	textfile	2	TRUE	0.000107877	50.9418
rs939916	A	G	A	G	0.0241795	0.0131605	0.669967	0.737376	FALSE	FALSE	FALSE	0.0470251	0.779584	325831	FOLLICULAR	TRUE	reported	0.00216724	6.6e-29	472174	TL	TRUE	reported	textfile	2	TRUE	0.000263551	124.474
rs9419958	C	T	C	T	-0.0810098	0.0321729	0.86139	0.888141	FALSE	FALSE	FALSE	0.0652422	0.621921	325831	FOLLICULAR	TRUE	reported	0.00293847	2.6e-167	472174	TL	TRUE	reported	textfile	2	TRUE	0.00160706	760.03
rs9600019	T	C	T	C	0.0127134	0.00621824	0.335579	0.377532	FALSE	FALSE	FALSE	0.0431006	0.885285	325831	FOLLICULAR	TRUE	reported	0.00213096	2.4e-09	472174	TL	TRUE	reported	textfile	2	TRUE	7.53769e-05	35.5935
rs9878436	T	C	T	C	-0.0143407	-0.00725072	0.434393	0.349596	FALSE	FALSE	FALSE	0.0433576	0.867188	325831	FOLLICULAR	TRUE	reported	0.00201819	1.2e-12	472174	TL	TRUE	reported	textfile	2	TRUE	0.000106922	50.4911
rs9955360	A	C	A	C	-0.0190311	-0.0504066	0.869288	0.847685	FALSE	FALSE	FALSE	0.0589615	0.392603	325831	FOLLICULAR	TRUE	reported	0.00299791	2.2e-10	472174	TL	TRUE	reported	textfile	2	TRUE	8.53398e-05	40.2985

## Sheet: hodgkin lymphoma
SNP	effect_allele.exposure	other_allele.exposure	effect_allele.outcome	other_allele.outcome	beta.exposure	beta.outcome	eaf.exposure	eaf.outcome	remove	palindromic	ambiguous	se.outcome	pval.outcome	samplesize.outcome	outcome	mr_keep.outcome	pval_origin.outcome	se.exposure	pval.exposure	samplesize.exposure	exposure	mr_keep.exposure	pval_origin.exposure	data_source.exposure	action	mr_keep	R2	F
rs1003322	A	C	A	C	0.0141734	0.0124418	0.213742	0.146405	FALSE	FALSE	FALSE	0.0696518	0.858229	325496	HODGKIN	TRUE	reported	0.00247546	1e-08	472174	TL	TRUE	reported	textfile	2	TRUE	6.94231e-05	32.7819
rs10112752	A	G	A	G	-0.0287522	0.0057374	0.430369	0.447355	FALSE	FALSE	FALSE	0.0492497	0.907259	325496	HODGKIN	TRUE	reported	0.00202518	9.5e-46	472174	TL	TRUE	reported	textfile	2	TRUE	0.000426705	201.564
rs1023767	A	G	A	G	-0.0183732	-0.0631024	0.237595	0.359229	FALSE	FALSE	FALSE	0.0506007	0.212373	325496	HODGKIN	TRUE	reported	0.00234772	5e-15	472174	TL	TRUE	reported	textfile	2	TRUE	0.000129694	61.2456
rs10768683	G	C	G	C	0.0469922	-0.0263876	0.841033	0.790305	FALSE	TRUE	FALSE	0.0607357	0.663949	325496	HODGKIN	TRUE	reported	0.00277015	1.5e-64	472174	TL	TRUE	reported	textfile	2	TRUE	0.000609086	287.768
rs10773176	G	A	G	A	-0.0172009	-0.0627418	0.741214	0.800345	FALSE	FALSE	FALSE	0.0625005	0.315445	325496	HODGKIN	TRUE	reported	0.00228534	5.2e-14	472174	TL	TRUE	reported	textfile	2	TRUE	0.000119963	56.6499
rs10774624	A	G	A	G	0.0149944	0.0601312	0.53276	0.612159	FALSE	FALSE	FALSE	0.0500772	0.229841	325496	HODGKIN	TRUE	reported	0.00205494	2.9e-13	472174	TL	TRUE	reported	textfile	2	TRUE	0.000112748	53.2425
rs10805346	C	T	C	T	0.0117072	0.0062715	0.439339	0.453463	FALSE	FALSE	FALSE	0.0493129	0.8988	325496	HODGKIN	TRUE	reported	0.00202147	7e-09	472174	TL	TRUE	reported	textfile	2	TRUE	7.10295e-05	33.5405
rs10840270	G	C	G	C	0.014383	0.0539237	0.655684	0.678394	FALSE	TRUE	FALSE	0.0520292	0.300009	325496	HODGKIN	TRUE	reported	0.00212494	1.3e-11	472174	TL	TRUE	reported	textfile	2	TRUE	9.702e-05	45.8146
rs10845387	A	G	A	G	-0.0141214	0.0477521	0.352666	0.353625	FALSE	FALSE	FALSE	0.052426	0.362376	325496	HODGKIN	TRUE	reported	0.00209396	1.5e-11	472174	TL	TRUE	reported	textfile	2	TRUE	9.63108e-05	45.4796
rs10905255	T	G	T	G	-0.0182493	0.000435916	0.57919	0.560768	FALSE	FALSE	FALSE	0.0494459	0.992966	325496	HODGKIN	TRUE	reported	0.00203099	2.6e-19	472174	TL	TRUE	reported	textfile	2	TRUE	0.000170962	80.7374
rs10936598	C	A	C	A	-0.0656433	-0.00998999	0.32379	0.347699	FALSE	FALSE	FALSE	0.0512583	0.845475	325496	HODGKIN	TRUE	reported	0.00214663	1e-200	472174	TL	TRUE	reported	textfile	2	TRUE	0.00197654	935.114
rs11085072	T	C	T	C	-0.0131806	0.0396165	0.236909	0.168604	FALSE	FALSE	FALSE	0.0663881	0.550681	325496	HODGKIN	TRUE	reported	0.00236713	2.6e-08	472174	TL	TRUE	reported	textfile	2	TRUE	6.56592e-05	31.0045
rs11117354	C	T	C	T	0.0232506	0.0431905	0.696513	0.588055	FALSE	FALSE	FALSE	0.0494109	0.382059	325496	HODGKIN	TRUE	reported	0.00219601	3.4e-26	472174	TL	TRUE	reported	textfile	2	TRUE	0.000237353	112.098
rs111527438	C	T	C	T	0.0125	0.0425521	0.351251	0.332411	FALSE	FALSE	FALSE	0.0522441	0.415367	325496	HODGKIN	TRUE	reported	0.00211016	3.1e-09	472174	TL	TRUE	reported	textfile	2	TRUE	7.43113e-05	35.0903
rs111950327	C	G	C	G	0.0238271	0.0808253	0.063628	0.0579196	FALSE	TRUE	FALSE	0.108247	0.455258	325496	HODGKIN	TRUE	reported	0.00409406	5.9e-09	472174	TL	TRUE	reported	textfile	2	TRUE	7.173e-05	33.8713
rs112394943	C	T	C	T	-0.0198961	-0.0470153	0.162741	0.225961	FALSE	FALSE	FALSE	0.058658	0.422833	325496	HODGKIN	TRUE	reported	0.00281641	1.6e-12	472174	TL	TRUE	reported	textfile	2	TRUE	0.000105681	49.9048
rs113525195	A	C	A	C	-0.0124075	-0.0524219	0.290254	0.291842	FALSE	FALSE	FALSE	0.0532343	0.324752	325496	HODGKIN	TRUE	reported	0.00224132	3.1e-08	472174	TL	TRUE	reported	textfile	2	TRUE	6.48979e-05	30.645
rs11557154	T	C	T	C	-0.0343719	0.0317962	0.13003	0.13372	FALSE	FALSE	FALSE	0.0726394	0.661584	325496	HODGKIN	TRUE	reported	0.00298538	1.1e-30	472174	TL	TRUE	reported	textfile	2	TRUE	0.000280662	132.558
rs11579626	C	A	C	A	0.0265113	-0.0180778	0.084882	0.118127	FALSE	FALSE	FALSE	0.0754272	0.810584	325496	HODGKIN	TRUE	reported	0.00357752	1.3e-13	472174	TL	TRUE	reported	textfile	2	TRUE	0.000116291	54.9156
rs11584821	T	C	T	C	-0.0306517	-0.093246	0.176208	0.163909	FALSE	FALSE	FALSE	0.0640112	0.145195	325496	HODGKIN	TRUE	reported	0.00263623	3e-31	472174	TL	TRUE	reported	textfile	2	TRUE	0.000286231	135.189
rs116863223	A	G	A	G	-0.0817874	-0.138756	0.011763	0.0135934	FALSE	FALSE	FALSE	0.196129	0.479271	325496	HODGKIN	TRUE	reported	0.00937157	2.6e-18	472174	TL	TRUE	reported	textfile	2	TRUE	0.000161278	76.1634
rs11699829	A	G	A	G	0.0641957	0.375873	0.034146	0.0212256	FALSE	FALSE	FALSE	0.201095	0.0616042	325496	HODGKIN	TRUE	reported	0.00602028	1.5e-26	472174	TL	TRUE	reported	textfile	2	TRUE	0.000240753	113.704
rs117034449	A	G	A	G	0.0374377	-0.188206	0.023304	0.0130024	FALSE	FALSE	FALSE	0.196851	0.33903	325496	HODGKIN	TRUE	reported	0.00667898	2.1e-08	472174	TL	TRUE	reported	textfile	2	TRUE	6.65376e-05	31.4193
rs117407747	T	C	T	C	0.0450533	-0.155166	0.027571	0.0094864	FALSE	FALSE	FALSE	0.235987	0.510846	325496	HODGKIN	TRUE	reported	0.00611706	1.8e-13	472174	TL	TRUE	reported	textfile	2	TRUE	0.000114872	54.2458
rs11746381	C	T	C	T	0.0329955	0.0108028	0.0568	0.070922	FALSE	FALSE	FALSE	0.095534	0.909969	325496	HODGKIN	TRUE	reported	0.00431036	1.9e-14	472174	TL	TRUE	reported	textfile	2	TRUE	0.000124087	58.5977
rs117512405	A	G	A	G	-0.0790134	-0.0605328	0.017043	0.0510453	FALSE	FALSE	FALSE	0.109431	0.580152	325496	HODGKIN	TRUE	reported	0.00824611	9.5e-22	472174	TL	TRUE	reported	textfile	2	TRUE	0.000194409	91.8124
rs117630647	A	G	A	G	0.059565	0.107975	0.021346	0.0190006	FALSE	FALSE	FALSE	0.188844	0.567479	325496	HODGKIN	TRUE	reported	0.00720413	1.4e-16	472174	TL	TRUE	reported	textfile	2	TRUE	0.000144762	68.3624
rs11769630	A	T	A	T	-0.0256807	-0.00299599	0.072227	0.103354	FALSE	TRUE	FALSE	0.080359	0.97026	325496	HODGKIN	TRUE	reported	0.00389475	4.3e-11	472174	TL	TRUE	reported	textfile	2	TRUE	9.20688e-05	43.4763
rs11991877	A	T	A	T	-0.030138	-0.0406809	0.889309	0.855361	FALSE	TRUE	FALSE	0.0702638	0.562607	325496	HODGKIN	TRUE	reported	0.00318686	3.2e-21	472174	TL	TRUE	reported	textfile	2	TRUE	0.000189373	89.4337
rs12369950	C	T	C	T	-0.0178308	-0.00924893	0.140675	0.147189	FALSE	FALSE	FALSE	0.0690252	0.893408	325496	HODGKIN	TRUE	reported	0.00290205	8e-10	472174	TL	TRUE	reported	textfile	2	TRUE	7.99457e-05	37.7511
rs12412214	A	G	A	G	-0.0245174	-0.160279	0.279765	0.353222	FALSE	FALSE	FALSE	0.0498643	0.00130765	325496	HODGKIN	TRUE	reported	0.00222685	3.4e-28	472174	TL	TRUE	reported	textfile	2	TRUE	0.000256657	121.217
rs12451892	C	T	C	T	-0.0116145	0.0915355	0.380511	0.453687	FALSE	FALSE	FALSE	0.0496621	0.065304	325496	HODGKIN	TRUE	reported	0.00207578	2.2e-08	472174	TL	TRUE	reported	textfile	2	TRUE	6.62991e-05	31.3066
rs1291143	C	A	C	A	0.0493145	0.0137396	0.849026	0.78179	FALSE	FALSE	FALSE	0.0589421	0.815681	325496	HODGKIN	TRUE	reported	0.0027991	1.8e-69	472174	TL	TRUE	reported	textfile	2	TRUE	0.000656939	310.392
rs12925933	C	A	C	A	-0.0146622	0.0827142	0.66221	0.564233	FALSE	FALSE	FALSE	0.0492456	0.0930294	325496	HODGKIN	TRUE	reported	0.00213796	7e-12	472174	TL	TRUE	reported	textfile	2	TRUE	9.95987e-05	47.0324
rs12932179	G	A	G	A	-0.0136257	0.0347389	0.561399	0.626552	FALSE	FALSE	FALSE	0.0501938	0.488877	325496	HODGKIN	TRUE	reported	0.0020276	1.8e-11	472174	TL	TRUE	reported	textfile	2	TRUE	9.56334e-05	45.1597
rs13062095	C	T	C	T	0.0138552	-0.0029148	0.327843	0.37162	FALSE	FALSE	FALSE	0.0505622	0.954029	325496	HODGKIN	TRUE	reported	0.00214113	9.7e-11	472174	TL	TRUE	reported	textfile	2	TRUE	8.86745e-05	41.8733
rs131797	T	TAAAAA	T	TAAAAA	0.0243752	0.0258309	0.235625	0.18636	FALSE	FALSE	FALSE	0.063333	0.683378	325496	HODGKIN	TRUE	reported	0.00236561	6.8e-25	472174	TL	TRUE	reported	textfile	2	TRUE	0.000224807	106.172
rs13230646	C	T	C	T	-0.0173277	-0.00257843	0.248945	0.177143	FALSE	FALSE	FALSE	0.0640432	0.967885	325496	HODGKIN	TRUE	reported	0.00232377	8.9e-14	472174	TL	TRUE	reported	textfile	2	TRUE	0.000117745	55.6024
rs1332941	G	A	G	A	0.0256552	0.117113	0.820466	0.81377	FALSE	FALSE	FALSE	0.0604244	0.0526017	325496	HODGKIN	TRUE	reported	0.00273159	5.9e-21	472174	TL	TRUE	reported	textfile	2	TRUE	0.000186783	88.21
rs137901416	A	G	A	G	0.04572	0.182595	0.100311	0.0779516	FALSE	FALSE	FALSE	0.0979945	0.062418	325496	HODGKIN	TRUE	reported	0.00332355	4.7e-43	472174	TL	TRUE	reported	textfile	2	TRUE	0.000400619	189.237
rs139669835	T	C	T	C	-0.0612563	-0.061323	0.009365	0.00117508	FALSE	FALSE	FALSE	0.700306	0.930222	325496	HODGKIN	TRUE	reported	0.0105346	6.1e-09	472174	TL	TRUE	reported	textfile	2	TRUE	7.16032e-05	33.8114
rs139795227	C	A	C	A	0.0599379	0.0913592	0.014021	0.0290293	FALSE	FALSE	FALSE	0.152278	0.548538	325496	HODGKIN	TRUE	reported	0.00873247	6.7e-12	472174	TL	TRUE	reported	textfile	2	TRUE	9.97662e-05	47.1115
rs141214782	TTATC	T	TTATC	T	-0.0246687	-0.0904227	0.101206	0.0993279	FALSE	FALSE	FALSE	0.0786615	0.250343	325496	HODGKIN	TRUE	reported	0.00335723	2e-13	472174	TL	TRUE	reported	textfile	2	TRUE	0.000114335	53.9919
rs142426306	T	C	T	C	-0.0504903	-0.0754357	0.039544	0.039809	FALSE	FALSE	FALSE	0.122524	0.538106	325496	HODGKIN	TRUE	reported	0.00539933	8.7e-21	472174	TL	TRUE	reported	textfile	2	TRUE	0.000185163	87.4449
rs143190905	T	G	T	G	-0.0723995	-0.0477959	0.080404	0.0719441	FALSE	FALSE	FALSE	0.0927118	0.606181	325496	HODGKIN	TRUE	reported	0.00369421	1.6e-85	472174	TL	TRUE	reported	textfile	2	TRUE	0.00081278	384.084
rs144204502	T	C	T	C	-0.100574	0.107317	0.012562	0.0401891	FALSE	FALSE	FALSE	0.1306	0.411232	325496	HODGKIN	TRUE	reported	0.00913369	3.4e-28	472174	TL	TRUE	reported	textfile	2	TRUE	0.000256723	121.249
rs145114957	G	C	G	C	0.0272605	0.0542302	0.042648	0.0419622	FALSE	TRUE	FALSE	0.124622	0.663448	325496	HODGKIN	TRUE	reported	0.00498872	4.6e-08	472174	TL	TRUE	reported	textfile	2	TRUE	6.32353e-05	29.8598
rs150150565	T	C	T	C	0.063762	-0.0417678	0.021455	0.0177235	FALSE	FALSE	FALSE	0.181864	0.818352	325496	HODGKIN	TRUE	reported	0.00739877	6.8e-18	472174	TL	TRUE	reported	textfile	2	TRUE	0.000157266	74.2682
rs16978028	T	A	T	A	-0.029945	0.0303417	0.143727	0.0841376	FALSE	TRUE	FALSE	0.0890219	0.733228	325496	HODGKIN	TRUE	reported	0.00285068	8.2e-26	472174	TL	TRUE	reported	textfile	2	TRUE	0.000233641	110.344
rs17445108	A	G	A	G	-0.0168922	-0.107921	0.12695	0.114991	FALSE	FALSE	FALSE	0.0744381	0.14711	325496	HODGKIN	TRUE	reported	0.00300983	2e-08	472174	TL	TRUE	reported	textfile	2	TRUE	6.67049e-05	31.4983
rs17677991	G	C	G	C	0.0222664	0.0180539	0.342123	0.399828	FALSE	TRUE	FALSE	0.0498768	0.717375	325496	HODGKIN	TRUE	reported	0.00210806	4.4e-26	472174	TL	TRUE	reported	textfile	2	TRUE	0.000236227	111.566
rs182059586	C	T	C	T	-0.0571159	0.328343	0.02511	0.00947017	FALSE	FALSE	FALSE	0.29032	0.258067	325496	HODGKIN	TRUE	reported	0.00680853	4.9e-17	472174	TL	TRUE	reported	textfile	2	TRUE	0.000149019	70.3729
rs185174247	A	G	A	G	0.0372806	0.133537	0.05609	0.0349418	FALSE	FALSE	FALSE	0.141101	0.343949	325496	HODGKIN	TRUE	reported	0.00435145	1.1e-17	472174	TL	TRUE	reported	textfile	2	TRUE	0.000155428	73.4
rs188918174	T	C	T	C	0.0403062	-0.113418	0.036106	0.0419761	FALSE	FALSE	FALSE	0.116295	0.329428	325496	HODGKIN	TRUE	reported	0.00543604	1.2e-13	472174	TL	TRUE	reported	textfile	2	TRUE	0.00011642	54.9764
rs1907702	A	G	A	G	0.0150247	-0.0065272	0.766771	0.80133	FALSE	FALSE	FALSE	0.0613289	0.915242	325496	HODGKIN	TRUE	reported	0.00242651	5.9e-10	472174	TL	TRUE	reported	textfile	2	TRUE	8.11914e-05	38.3394
rs1957937	T	A	T	A	0.0209365	0.0957767	0.16018	0.199794	FALSE	TRUE	FALSE	0.0626306	0.126207	325496	HODGKIN	TRUE	reported	0.00273361	1.9e-14	472174	TL	TRUE	reported	textfile	2	TRUE	0.000124216	58.6588
rs1985369	G	A	G	A	-0.0311893	0.0423357	0.868178	0.894651	FALSE	FALSE	FALSE	0.0787679	0.590941	325496	HODGKIN	TRUE	reported	0.00300952	3.6e-25	472174	TL	TRUE	reported	textfile	2	TRUE	0.000227413	107.403
rs201009932	T	TA	T	TA	0.0769296	-0.146037	0.991068	0.973212	FALSE	FALSE	FALSE	0.163432	0.371557	325496	HODGKIN	TRUE	reported	0.0116209	3.6e-11	472174	TL	TRUE	reported	textfile	2	TRUE	9.28036e-05	43.8234
rs2056726	A	G	A	G	-0.0228078	-0.0554234	0.214376	0.216664	FALSE	FALSE	FALSE	0.0585182	0.34358	325496	HODGKIN	TRUE	reported	0.00243638	7.9e-21	472174	TL	TRUE	reported	textfile	2	TRUE	0.000185564	87.6345
rs2230590	C	T	C	T	-0.0158022	0.115414	0.510897	0.424941	FALSE	FALSE	FALSE	0.0500348	0.0210732	325496	HODGKIN	TRUE	reported	0.00200806	3.6e-15	472174	TL	TRUE	reported	textfile	2	TRUE	0.000131136	61.927
rs2282764	G	A	G	A	-0.0224234	0.0227367	0.142384	0.144282	FALSE	FALSE	FALSE	0.0701291	0.745777	325496	HODGKIN	TRUE	reported	0.00289392	9.3e-15	472174	TL	TRUE	reported	textfile	2	TRUE	0.000127137	60.0383
rs2293579	A	G	A	G	-0.012915	-0.110862	0.386274	0.27505	FALSE	FALSE	FALSE	0.0534395	0.0380294	325496	HODGKIN	TRUE	reported	0.00205481	3.3e-10	472174	TL	TRUE	reported	textfile	2	TRUE	8.36579e-05	39.5042
rs2538745	C	T	C	T	-0.012942	-0.0530281	0.602841	0.517814	FALSE	FALSE	FALSE	0.0489011	0.27819	325496	HODGKIN	TRUE	reported	0.002056	3.1e-10	472174	TL	TRUE	reported	textfile	2	TRUE	8.39108e-05	39.6237
rs2555104	C	A	C	A	-0.0139717	-0.0679602	0.434255	0.461385	FALSE	FALSE	FALSE	0.0488466	0.164135	325496	HODGKIN	TRUE	reported	0.00203498	6.6e-12	472174	TL	TRUE	reported	textfile	2	TRUE	9.98235e-05	47.1386
rs2763979	T	C	T	C	-0.0277713	-0.0762411	0.359721	0.417849	FALSE	FALSE	FALSE	0.0491017	0.12049	325496	HODGKIN	TRUE	reported	0.00208092	1.3e-40	472174	TL	TRUE	reported	textfile	2	TRUE	0.000377065	178.107
rs28502153	A	C	A	C	-0.0215916	0.0145679	0.377958	0.375302	FALSE	FALSE	FALSE	0.0505701	0.773289	325496	HODGKIN	TRUE	reported	0.00206208	1.2e-25	472174	TL	TRUE	reported	textfile	2	TRUE	0.000232143	109.637
rs28577594	C	G	C	G	0.0187657	-0.0557971	0.709829	0.696829	FALSE	TRUE	FALSE	0.0539749	0.301248	325496	HODGKIN	TRUE	reported	0.00224024	5.4e-17	472174	TL	TRUE	reported	textfile	2	TRUE	0.000148585	70.1679
rs2967355	C	A	C	A	-0.0461595	0.0109115	0.774276	0.826821	FALSE	FALSE	FALSE	0.064378	0.86541	325496	HODGKIN	TRUE	reported	0.00238972	4e-83	472174	TL	TRUE	reported	textfile	2	TRUE	0.000789556	373.101
rs2977608	C	A	C	A	0.0129483	-0.0590189	0.743949	0.679296	FALSE	FALSE	FALSE	0.0529919	0.265393	325496	HODGKIN	TRUE	reported	0.00233716	3e-08	472174	TL	TRUE	reported	textfile	2	TRUE	6.50007e-05	30.6935
rs3093888	A	G	A	G	-0.028973	-0.0327508	0.05131	0.0851852	FALSE	FALSE	FALSE	0.0863034	0.704328	325496	HODGKIN	TRUE	reported	0.00452459	1.5e-10	472174	TL	TRUE	reported	textfile	2	TRUE	8.68338e-05	41.004
rs35640778	A	G	A	G	-0.209011	0.10452	0.020757	0.0140731	FALSE	FALSE	FALSE	0.218669	0.632662	325496	HODGKIN	TRUE	reported	0.00702087	9.59e-195	472174	TL	TRUE	reported	textfile	2	TRUE	0.00187344	886.247
rs3767952	A	G	A	G	0.0134472	-0.0109261	0.226709	0.220271	FALSE	FALSE	FALSE	0.0587156	0.852378	325496	HODGKIN	TRUE	reported	0.00238826	1.8e-08	472174	TL	TRUE	reported	textfile	2	TRUE	6.71381e-05	31.7029
rs3785074	G	A	G	A	0.023863	0.0499649	0.289672	0.218085	FALSE	FALSE	FALSE	0.0599763	0.404801	325496	HODGKIN	TRUE	reported	0.00220455	2.6e-27	472174	TL	TRUE	reported	textfile	2	TRUE	0.000248085	117.168
rs3891167	G	A	G	A	-0.0425685	0.060047	0.253435	0.266715	FALSE	FALSE	FALSE	0.056463	0.287567	325496	HODGKIN	TRUE	reported	0.00239551	1.2e-70	472174	TL	TRUE	reported	textfile	2	TRUE	0.000668326	315.776
rs41269079	A	T	A	T	0.0153617	0.164359	0.188991	0.236488	FALSE	TRUE	FALSE	0.0575001	0.00425775	325496	HODGKIN	TRUE	reported	0.0025499	1.7e-09	472174	TL	TRUE	reported	textfile	2	TRUE	7.68594e-05	36.2936
rs41304832	A	G	A	G	0.0611702	0.102053	0.012378	0.0408821	FALSE	FALSE	FALSE	0.129708	0.431402	325496	HODGKIN	TRUE	reported	0.0093095	5e-11	472174	TL	TRUE	reported	textfile	2	TRUE	9.14293e-05	43.1743
rs429358	C	T	C	T	0.0173498	-0.0141604	0.153969	0.180302	FALSE	FALSE	FALSE	0.063493	0.823518	325496	HODGKIN	TRUE	reported	0.00277091	3.8e-10	472174	TL	TRUE	reported	textfile	2	TRUE	8.30244e-05	39.2051
rs4498805	T	G	T	G	0.0150601	-0.00558109	0.546632	0.50614	FALSE	FALSE	FALSE	0.0487993	0.908946	325496	HODGKIN	TRUE	reported	0.00200376	5.7e-14	472174	TL	TRUE	reported	textfile	2	TRUE	0.000119622	56.4888
rs4530278	T	G	T	G	0.0138793	0.051293	0.59815	0.615832	FALSE	FALSE	FALSE	0.0498387	0.303395	325496	HODGKIN	TRUE	reported	0.0020567	1.5e-11	472174	TL	TRUE	reported	textfile	2	TRUE	9.64382e-05	45.5398
rs45604339	T	C	T	C	-0.020433	-0.0737711	0.34242	0.369096	FALSE	FALSE	FALSE	0.0500523	0.140514	325496	HODGKIN	TRUE	reported	0.00211433	4.3e-22	472174	TL	TRUE	reported	textfile	2	TRUE	0.000197756	93.3936
rs4695407	G	A	G	A	0.0141511	-0.0335469	0.507843	0.460763	FALSE	FALSE	FALSE	0.0489488	0.493125	325496	HODGKIN	TRUE	reported	0.00199925	1.5e-12	472174	TL	TRUE	reported	textfile	2	TRUE	0.000106096	50.1008
rs4724	A	G	A	G	-0.0547446	-0.0226442	0.116598	0.105813	FALSE	FALSE	FALSE	0.0787831	0.773788	325496	HODGKIN	TRUE	reported	0.00312441	9.8e-69	472174	TL	TRUE	reported	textfile	2	TRUE	0.000649774	307.004
rs4731541	G	C	G	C	-0.0206119	-0.0480347	0.624901	0.626399	FALSE	TRUE	FALSE	0.0508189	0.34455	325496	HODGKIN	TRUE	reported	0.00205962	1.4e-23	472174	TL	TRUE	reported	textfile	2	TRUE	0.000212064	100.152
rs4743037	T	C	T	C	0.0147971	-0.0546091	0.230874	0.210745	FALSE	FALSE	FALSE	0.0591399	0.355805	325496	HODGKIN	TRUE	reported	0.00238094	5.1e-10	472174	TL	TRUE	reported	textfile	2	TRUE	8.17935e-05	38.6238
rs55747751	A	G	A	G	-0.0211612	-0.178274	0.077375	0.0485491	FALSE	FALSE	FALSE	0.104864	0.089121	325496	HODGKIN	TRUE	reported	0.00375164	1.7e-08	472174	TL	TRUE	reported	textfile	2	TRUE	6.73763e-05	31.8153
rs56799554	G	A	G	A	-0.0259793	0.0739671	0.170183	0.247603	FALSE	FALSE	FALSE	0.0581048	0.20302	325496	HODGKIN	TRUE	reported	0.00267858	3e-22	472174	TL	TRUE	reported	textfile	2	TRUE	0.000199185	94.0684
rs5742915	C	T	C	T	0.0193377	0.0524322	0.445829	0.420804	FALSE	FALSE	FALSE	0.0495014	0.289506	325496	HODGKIN	TRUE	reported	0.00202886	1.6e-21	472174	TL	TRUE	reported	textfile	2	TRUE	0.000192362	90.8455
rs59409453	G	A	G	A	0.0202133	-0.0348821	0.730602	0.785931	FALSE	FALSE	FALSE	0.0603821	0.563474	325496	HODGKIN	TRUE	reported	0.00230175	1.6e-18	472174	TL	TRUE	reported	textfile	2	TRUE	0.0001633	77.1181
rs6007020	C	T	C	T	0.0144904	0.0256789	0.367823	0.361424	FALSE	FALSE	FALSE	0.0510621	0.615038	325496	HODGKIN	TRUE	reported	0.00209637	4.8e-12	472174	TL	TRUE	reported	textfile	2	TRUE	0.000101176	47.7775
rs6054257	A	G	A	G	-0.0141684	-0.153541	0.793522	0.778492	FALSE	FALSE	FALSE	0.0614464	0.0124621	325496	HODGKIN	TRUE	reported	0.00247729	1.1e-08	472174	TL	TRUE	reported	textfile	2	TRUE	6.92717e-05	32.7104
rs611646	A	T	A	T	-0.0368309	-0.0360653	0.408685	0.387162	FALSE	TRUE	FALSE	0.0498103	0.469033	325496	HODGKIN	TRUE	reported	0.00203547	3.5e-73	472174	TL	TRUE	reported	textfile	2	TRUE	0.000692934	327.411
rs61748181	T	C	T	C	-0.059181	-0.014711	0.028928	0.0526121	FALSE	FALSE	FALSE	0.109151	0.892788	325496	HODGKIN	TRUE	reported	0.00595394	2.8e-23	472174	TL	TRUE	reported	textfile	2	TRUE	0.000209201	98.7993
rs6536702	A	G	A	G	0.0534148	0.0989981	0.774647	0.832536	FALSE	FALSE	FALSE	0.0633146	0.117914	325496	HODGKIN	TRUE	reported	0.00238875	9.4e-111	472174	TL	TRUE	reported	textfile	2	TRUE	0.00105784	500.011
rs6584579	G	A	G	A	0.0114923	-0.0736788	0.398876	0.310525	FALSE	FALSE	FALSE	0.0522368	0.158399	325496	HODGKIN	TRUE	reported	0.00204674	2e-08	472174	TL	TRUE	reported	textfile	2	TRUE	6.67663e-05	31.5273
rs6587577	G	A	G	A	-0.0182148	-0.03876	0.826346	0.836896	FALSE	FALSE	FALSE	0.0670197	0.563037	325496	HODGKIN	TRUE	reported	0.0026359	4.8e-12	472174	TL	TRUE	reported	textfile	2	TRUE	0.000101122	47.7517
rs6659669	T	C	T	C	-0.0117091	0.00309391	0.605095	0.587422	FALSE	FALSE	FALSE	0.0496386	0.950301	325496	HODGKIN	TRUE	reported	0.00205167	1.1e-08	472174	TL	TRUE	reported	textfile	2	TRUE	6.89763e-05	32.5709
rs6669563	A	G	A	G	0.0182358	0.049144	0.437768	0.483908	FALSE	FALSE	FALSE	0.04905	0.316384	325496	HODGKIN	TRUE	reported	0.00202476	2.1e-19	472174	TL	TRUE	reported	textfile	2	TRUE	0.000171762	81.1149
rs66731853	A	G	A	G	-0.0177791	-0.0766199	0.317304	0.181368	FALSE	FALSE	FALSE	0.0616987	0.214296	325496	HODGKIN	TRUE	reported	0.00215421	1.5e-16	472174	TL	TRUE	reported	textfile	2	TRUE	0.000144238	68.1148
rs6751209	C	T	C	T	-0.0140465	-0.00513696	0.204231	0.180782	FALSE	FALSE	FALSE	0.063492	0.935516	325496	HODGKIN	TRUE	reported	0.00248465	1.6e-08	472174	TL	TRUE	reported	textfile	2	TRUE	6.76822e-05	31.9598
rs6776756	A	G	A	G	-0.0174439	-0.000248337	0.597562	0.532819	FALSE	FALSE	FALSE	0.0494382	0.995992	325496	HODGKIN	TRUE	reported	0.00203747	1.1e-17	472174	TL	TRUE	reported	textfile	2	TRUE	0.000155216	73.2998
rs6881568	A	C	A	C	0.0169256	-0.0713667	0.36258	0.259767	FALSE	FALSE	FALSE	0.0547557	0.19245	325496	HODGKIN	TRUE	reported	0.00207735	3.7e-16	472174	TL	TRUE	reported	textfile	2	TRUE	0.000140574	66.3845
rs7099229	A	G	A	G	-0.0153288	0.0154504	0.273301	0.183785	FALSE	FALSE	FALSE	0.0638212	0.808711	325496	HODGKIN	TRUE	reported	0.00224403	8.4e-12	472174	TL	TRUE	reported	textfile	2	TRUE	9.8813e-05	46.6613
rs7164950	G	A	G	A	0.0129362	-0.0228396	0.405979	0.412244	FALSE	FALSE	FALSE	0.0497324	0.646054	325496	HODGKIN	TRUE	reported	0.00204001	2.3e-10	472174	TL	TRUE	reported	textfile	2	TRUE	8.51549e-05	40.2112
rs7209057	A	G	A	G	0.011819	-0.0346679	0.561044	0.54329	FALSE	FALSE	FALSE	0.0490542	0.479736	325496	HODGKIN	TRUE	reported	0.00202865	5.7e-09	472174	TL	TRUE	reported	textfile	2	TRUE	7.1881e-05	33.9426
rs7221585	T	C	T	C	0.0143271	-0.021962	0.22401	0.281836	FALSE	FALSE	FALSE	0.0540892	0.684718	325496	HODGKIN	TRUE	reported	0.00247042	6.7e-09	472174	TL	TRUE	reported	textfile	2	TRUE	7.12266e-05	33.6336
rs73581419	T	C	T	C	0.0229838	-0.0974921	0.106605	0.0751147	FALSE	FALSE	FALSE	0.0887795	0.272144	325496	HODGKIN	TRUE	reported	0.00324156	1.3e-12	472174	TL	TRUE	reported	textfile	2	TRUE	0.00010646	50.2729
rs75664430	G	C	G	C	-0.0235179	0.0373326	0.248028	0.196783	FALSE	TRUE	FALSE	0.0621685	0.548168	325496	HODGKIN	TRUE	reported	0.0023186	3.6e-24	472174	TL	TRUE	reported	textfile	2	TRUE	0.000217846	102.883
rs76065543	T	C	T	C	0.0342843	-0.0456578	0.137527	0.178081	FALSE	FALSE	FALSE	0.0627364	0.466753	325496	HODGKIN	TRUE	reported	0.00290708	4.2e-32	472174	TL	TRUE	reported	textfile	2	TRUE	0.000294474	139.083
rs76094497	A	G	A	G	0.0278689	-0.0292403	0.051569	0.0248227	FALSE	FALSE	FALSE	0.155137	0.8505	325496	HODGKIN	TRUE	reported	0.00461731	1.6e-09	472174	TL	TRUE	reported	textfile	2	TRUE	7.71482e-05	36.43
rs76219171	A	G	A	G	0.0359839	-0.0270939	0.058433	0.0336879	FALSE	FALSE	FALSE	0.133707	0.839419	325496	HODGKIN	TRUE	reported	0.00431741	7.8e-17	472174	TL	TRUE	reported	textfile	2	TRUE	0.000147097	69.4653
rs762679	A	T	A	T	0.0310104	0.123648	0.856501	0.845902	FALSE	TRUE	FALSE	0.0650006	0.057136	325496	HODGKIN	TRUE	reported	0.00285024	1.4e-27	472174	TL	TRUE	reported	textfile	2	TRUE	0.000250635	118.372
rs76666449	C	T	C	T	0.0295125	-0.121118	0.100625	0.122718	FALSE	FALSE	FALSE	0.0710903	0.0884341	325496	HODGKIN	TRUE	reported	0.00333186	8.2e-19	472174	TL	TRUE	reported	textfile	2	TRUE	0.000166136	78.4579
rs77231040	C	G	C	G	0.0989303	-0.0663536	0.005742	0.0243731	FALSE	TRUE	FALSE	0.153575	0.665698	325496	HODGKIN	TRUE	reported	0.0134649	2e-13	472174	TL	TRUE	reported	textfile	2	TRUE	0.000114314	53.9822
rs7726159	A	C	A	C	0.0707719	0.107803	0.327295	0.349305	FALSE	FALSE	FALSE	0.052153	0.0387284	325496	HODGKIN	TRUE	reported	0.0021282	1e-200	472174	TL	TRUE	reported	textfile	2	TRUE	0.00233657	1105.85
rs7772289	T	G	T	G	0.017549	0.00560757	0.503081	0.617021	FALSE	FALSE	FALSE	0.0502173	0.911088	325496	HODGKIN	TRUE	reported	0.00200003	1.7e-18	472174	TL	TRUE	reported	textfile	2	TRUE	0.000163027	76.9892
rs77732866	A	G	A	G	0.0177942	0.0781384	0.137597	0.152538	FALSE	FALSE	FALSE	0.0696708	0.26206	325496	HODGKIN	TRUE	reported	0.00290595	9.2e-10	472174	TL	TRUE	reported	textfile	2	TRUE	7.94043e-05	37.4955
rs7790856	T	C	T	C	-0.0437199	-0.0766373	0.289139	0.212673	FALSE	FALSE	FALSE	0.0584558	0.189848	325496	HODGKIN	TRUE	reported	0.00220526	1.8e-87	472174	TL	TRUE	reported	textfile	2	TRUE	0.000831716	393.04
rs78491606	C	A	C	A	-0.0756311	-0.0932881	0.018433	0.0254856	FALSE	FALSE	FALSE	0.148809	0.530724	325496	HODGKIN	TRUE	reported	0.00741168	1.9e-24	472174	TL	TRUE	reported	textfile	2	TRUE	0.00022048	104.128
rs79977579	A	C	A	C	0.0281517	-0.0067543	0.09555	0.0962036	FALSE	FALSE	FALSE	0.082837	0.935015	325496	HODGKIN	TRUE	reported	0.00343182	2.3e-16	472174	TL	TRUE	reported	textfile	2	TRUE	0.000142494	67.2912
rs80116508	A	G	A	G	-0.0352672	0.130035	0.062356	0.0874473	FALSE	FALSE	FALSE	0.0907724	0.15199	325496	HODGKIN	TRUE	reported	0.00415151	2e-17	472174	TL	TRUE	reported	textfile	2	TRUE	0.000152813	72.1652
rs80324517	A	G	A	G	0.0396515	-0.0016039	0.048259	0.0620359	FALSE	FALSE	FALSE	0.10106	0.987338	325496	HODGKIN	TRUE	reported	0.00466286	1.8e-17	472174	TL	TRUE	reported	textfile	2	TRUE	0.000153125	72.3124
rs8102497	A	G	A	G	-0.0149654	-0.0163645	0.431828	0.447101	FALSE	FALSE	FALSE	0.0490453	0.738635	325496	HODGKIN	TRUE	reported	0.0020233	1.4e-13	472174	TL	TRUE	reported	textfile	2	TRUE	0.000115852	54.7084
rs8105767	G	A	G	A	0.0328384	0.0214486	0.29467	0.321821	FALSE	FALSE	FALSE	0.0525211	0.682994	325496	HODGKIN	TRUE	reported	0.00220117	2.5e-50	472174	TL	TRUE	reported	textfile	2	TRUE	0.00047114	222.564
rs869785	C	T	C	T	-0.0147303	0.0575115	0.672471	0.673485	FALSE	FALSE	FALSE	0.0516366	0.265376	325496	HODGKIN	TRUE	reported	0.00212801	4.4e-12	472174	TL	TRUE	reported	textfile	2	TRUE	0.000101468	47.9153
rs871134	T	C	T	C	-0.0182986	-0.0654294	0.569032	0.538061	FALSE	FALSE	FALSE	0.0492131	0.18368	325496	HODGKIN	TRUE	reported	0.0020263	1.7e-19	472174	TL	TRUE	reported	textfile	2	TRUE	0.000172684	81.5505
rs932002	T	C	T	C	-0.0402052	-1.20713e-05	0.150843	0.236733	FALSE	FALSE	FALSE	0.0574218	0.999832	325496	HODGKIN	TRUE	reported	0.00279667	7.3e-47	472174	TL	TRUE	reported	textfile	2	TRUE	0.000437512	206.671
rs9398196	G	A	G	A	-0.0143586	-0.0401291	0.52005	0.6123	FALSE	FALSE	FALSE	0.0506198	0.42792	325496	HODGKIN	TRUE	reported	0.00201175	9.5e-13	472174	TL	TRUE	reported	textfile	2	TRUE	0.000107877	50.9418
rs939916	A	G	A	G	0.0241795	0.00950508	0.669967	0.735271	FALSE	FALSE	FALSE	0.0553659	0.863691	325496	HODGKIN	TRUE	reported	0.00216724	6.6e-29	472174	TL	TRUE	reported	textfile	2	TRUE	0.000263551	124.474
rs9419958	C	T	C	T	-0.0810098	-0.0538784	0.86139	0.879287	FALSE	FALSE	FALSE	0.0766156	0.481912	325496	HODGKIN	TRUE	reported	0.00293847	2.6e-167	472174	TL	TRUE	reported	textfile	2	TRUE	0.00160706	760.03
rs9600019	T	C	T	C	0.0127134	0.11765	0.335579	0.398702	FALSE	FALSE	FALSE	0.0506569	0.0202069	325496	HODGKIN	TRUE	reported	0.00213096	2.4e-09	472174	TL	TRUE	reported	textfile	2	TRUE	7.53769e-05	35.5935
rs9878436	T	C	T	C	-0.0143407	0.0155973	0.434393	0.357009	FALSE	FALSE	FALSE	0.0511426	0.760384	325496	HODGKIN	TRUE	reported	0.00201819	1.2e-12	472174	TL	TRUE	reported	textfile	2	TRUE	0.000106922	50.4911
rs9955360	A	C	A	C	-0.0190311	0.0251986	0.869288	0.858469	FALSE	FALSE	FALSE	0.0698663	0.718347	325496	HODGKIN	TRUE	reported	0.00299791	2.2e-10	472174	TL	TRUE	reported	textfile	2	TRUE	8.53398e-05	40.2985

## Sheet: monocytic leukemia
SNP	effect_allele.exposure	other_allele.exposure	effect_allele.outcome	other_allele.outcome	beta.exposure	beta.outcome	eaf.exposure	eaf.outcome	remove	palindromic	ambiguous	se.outcome	pval.outcome	samplesize.outcome	outcome	mr_keep.outcome	pval_origin.outcome	se.exposure	pval.exposure	samplesize.exposure	exposure	mr_keep.exposure	pval_origin.exposure	data_source.exposure	action	mr_keep	R2	F
rs1003322	A	C	A	C	0.0141734	0.160274	0.213742	0.163668	FALSE	FALSE	FALSE	0.220033	0.466362	324735	MONOCYTIC	TRUE	reported	0.00247546	1e-08	472174	TL	TRUE	reported	textfile	2	TRUE	6.94231e-05	32.7819
rs10112752	A	G	A	G	-0.0287522	0.181156	0.430369	0.494002	FALSE	FALSE	FALSE	0.154712	0.241629	324735	MONOCYTIC	TRUE	reported	0.00202518	9.5e-46	472174	TL	TRUE	reported	textfile	2	TRUE	0.000426705	201.564
rs1023767	A	G	A	G	-0.0183732	0.071073	0.237595	0.388235	FALSE	FALSE	FALSE	0.158281	0.65341	324735	MONOCYTIC	TRUE	reported	0.00234772	5e-15	472174	TL	TRUE	reported	textfile	2	TRUE	0.000129694	61.2456
rs10768683	G	C	G	C	0.0469922	0.00903882	0.841033	0.798893	FALSE	TRUE	FALSE	0.192554	0.96256	324735	MONOCYTIC	TRUE	reported	0.00277015	1.5e-64	472174	TL	TRUE	reported	textfile	2	TRUE	0.000609086	287.768
rs10773176	G	A	G	A	-0.0172009	0.199131	0.741214	0.835156	FALSE	FALSE	FALSE	0.193893	0.304414	324735	MONOCYTIC	TRUE	reported	0.00228534	5.2e-14	472174	TL	TRUE	reported	textfile	2	TRUE	0.000119963	56.6499
rs10774624	A	G	A	G	0.0149944	0.0526719	0.53276	0.60842	FALSE	FALSE	FALSE	0.157145	0.737488	324735	MONOCYTIC	TRUE	reported	0.00205494	2.9e-13	472174	TL	TRUE	reported	textfile	2	TRUE	0.000112748	53.2425
rs10805346	C	T	C	T	0.0117072	0.00661116	0.439339	0.448235	FALSE	FALSE	FALSE	0.155069	0.965993	324735	MONOCYTIC	TRUE	reported	0.00202147	7e-09	472174	TL	TRUE	reported	textfile	2	TRUE	7.10295e-05	33.5405
rs10840270	G	C	G	C	0.014383	0.202829	0.655684	0.711649	FALSE	TRUE	FALSE	0.163162	0.213824	324735	MONOCYTIC	TRUE	reported	0.00212494	1.3e-11	472174	TL	TRUE	reported	textfile	2	TRUE	9.702e-05	45.8146
rs10845387	A	G	A	G	-0.0141214	0.122684	0.352666	0.375087	FALSE	FALSE	FALSE	0.165425	0.458312	324735	MONOCYTIC	TRUE	reported	0.00209396	1.5e-11	472174	TL	TRUE	reported	textfile	2	TRUE	9.63108e-05	45.4796
rs10905255	T	G	T	G	-0.0182493	0.189038	0.57919	0.607036	FALSE	FALSE	FALSE	0.156585	0.227334	324735	MONOCYTIC	TRUE	reported	0.00203099	2.6e-19	472174	TL	TRUE	reported	textfile	2	TRUE	0.000170962	80.7374
rs10936598	C	A	C	A	-0.0656433	-0.0448098	0.32379	0.334948	FALSE	FALSE	FALSE	0.161916	0.781975	324735	MONOCYTIC	TRUE	reported	0.00214663	1e-200	472174	TL	TRUE	reported	textfile	2	TRUE	0.00197654	935.114
rs11085072	T	C	T	C	-0.0131806	-0.212674	0.236909	0.134164	FALSE	FALSE	FALSE	0.210298	0.311874	324735	MONOCYTIC	TRUE	reported	0.00236713	2.6e-08	472174	TL	TRUE	reported	textfile	2	TRUE	6.56592e-05	31.0045
rs11117354	C	T	C	T	0.0232506	0.0219936	0.696513	0.588235	FALSE	FALSE	FALSE	0.156037	0.887909	324735	MONOCYTIC	TRUE	reported	0.00219601	3.4e-26	472174	TL	TRUE	reported	textfile	2	TRUE	0.000237353	112.098
rs111527438	C	T	C	T	0.0125	0.398224	0.351251	0.405536	FALSE	FALSE	FALSE	0.164784	0.0156646	324735	MONOCYTIC	TRUE	reported	0.00211016	3.1e-09	472174	TL	TRUE	reported	textfile	2	TRUE	7.43113e-05	35.0903
rs111950327	C	G	C	G	0.0238271	-0.265498	0.063628	0.0352941	FALSE	TRUE	FALSE	0.360149	0.461008	324735	MONOCYTIC	TRUE	reported	0.00409406	5.9e-09	472174	TL	TRUE	reported	textfile	2	TRUE	7.173e-05	33.8713
rs112394943	C	T	C	T	-0.0198961	-0.305727	0.162741	0.182076	FALSE	FALSE	FALSE	0.18382	0.0962742	324735	MONOCYTIC	TRUE	reported	0.00281641	1.6e-12	472174	TL	TRUE	reported	textfile	2	TRUE	0.000105681	49.9048
rs113525195	A	C	A	C	-0.0124075	0.0184145	0.290254	0.305998	FALSE	FALSE	FALSE	0.167585	0.912503	324735	MONOCYTIC	TRUE	reported	0.00224132	3.1e-08	472174	TL	TRUE	reported	textfile	2	TRUE	6.48979e-05	30.645
rs11557154	T	C	T	C	-0.0343719	0.290755	0.13003	0.166528	FALSE	FALSE	FALSE	0.225275	0.196819	324735	MONOCYTIC	TRUE	reported	0.00298538	1.1e-30	472174	TL	TRUE	reported	textfile	2	TRUE	0.000280662	132.558
rs11579626	C	A	C	A	0.0265113	0.0183452	0.084882	0.12346	FALSE	FALSE	FALSE	0.235455	0.937897	324735	MONOCYTIC	TRUE	reported	0.00357752	1.3e-13	472174	TL	TRUE	reported	textfile	2	TRUE	0.000116291	54.9156
rs11584821	T	C	T	C	-0.0306517	0.0121229	0.176208	0.185952	FALSE	FALSE	FALSE	0.197377	0.951024	324735	MONOCYTIC	TRUE	reported	0.00263623	3e-31	472174	TL	TRUE	reported	textfile	2	TRUE	0.000286231	135.189
rs116863223	A	G	A	G	-0.0817874	0.500108	0.011763	0.0234141	FALSE	FALSE	FALSE	0.62082	0.420496	324735	MONOCYTIC	TRUE	reported	0.00937157	2.6e-18	472174	TL	TRUE	reported	textfile	2	TRUE	0.000161278	76.1634
rs11699829	A	G	A	G	0.0641957	1.5135	0.034146	0.0388927	FALSE	FALSE	FALSE	0.628737	0.016075	324735	MONOCYTIC	TRUE	reported	0.00602028	1.5e-26	472174	TL	TRUE	reported	textfile	2	TRUE	0.000240753	113.704
rs117034449	A	G	A	G	0.0374377	-1.0261	0.023304		FALSE	FALSE	FALSE	0.630587	0.103691	324735	MONOCYTIC	TRUE	reported	0.00667898	2.1e-08	472174	TL	TRUE	reported	textfile	2	TRUE	6.65376e-05	31.4193
rs117407747	T	C	T	C	0.0450533	0.218673	0.027571	0.0117647	FALSE	FALSE	FALSE	0.79984	0.784549	324735	MONOCYTIC	TRUE	reported	0.00611706	1.8e-13	472174	TL	TRUE	reported	textfile	2	TRUE	0.000114872	54.2458
rs11746381	C	T	C	T	0.0329955	-0.204427	0.0568	0.0588235	FALSE	FALSE	FALSE	0.295203	0.488626	324735	MONOCYTIC	TRUE	reported	0.00431036	1.9e-14	472174	TL	TRUE	reported	textfile	2	TRUE	0.000124087	58.5977
rs117512405	A	G	A	G	-0.0790134	0.0855725	0.017043	0.0590311	FALSE	FALSE	FALSE	0.343039	0.80301	324735	MONOCYTIC	TRUE	reported	0.00824611	9.5e-22	472174	TL	TRUE	reported	textfile	2	TRUE	0.000194409	91.8124
rs117630647	A	G	A	G	0.059565	1.23225	0.021346	0.0352941	FALSE	FALSE	FALSE	0.613916	0.0447291	324735	MONOCYTIC	TRUE	reported	0.00720413	1.4e-16	472174	TL	TRUE	reported	textfile	2	TRUE	0.000144762	68.3624
rs11769630	A	T	A	T	-0.0256807	-0.600858	0.072227	0.0485813	FALSE	TRUE	FALSE	0.252491	0.0173257	324735	MONOCYTIC	TRUE	reported	0.00389475	4.3e-11	472174	TL	TRUE	reported	textfile	2	TRUE	9.20688e-05	43.4763
rs11991877	A	T	A	T	-0.030138	-0.562837	0.889309	0.788235	FALSE	TRUE	FALSE	0.219756	0.0104313	324735	MONOCYTIC	TRUE	reported	0.00318686	3.2e-21	472174	TL	TRUE	reported	textfile	2	TRUE	0.000189373	89.4337
rs12369950	C	T	C	T	-0.0178308	0.10018	0.140675	0.158824	FALSE	FALSE	FALSE	0.21641	0.643425	324735	MONOCYTIC	TRUE	reported	0.00290205	8e-10	472174	TL	TRUE	reported	textfile	2	TRUE	7.99457e-05	37.7511
rs12412214	A	G	A	G	-0.0245174	-0.177365	0.279765	0.347589	FALSE	FALSE	FALSE	0.157236	0.259313	324735	MONOCYTIC	TRUE	reported	0.00222685	3.4e-28	472174	TL	TRUE	reported	textfile	2	TRUE	0.000256657	121.217
rs12451892	C	T	C	T	-0.0116145	0.0198017	0.380511	0.435248	FALSE	FALSE	FALSE	0.156855	0.89954	324735	MONOCYTIC	TRUE	reported	0.00207578	2.2e-08	472174	TL	TRUE	reported	textfile	2	TRUE	6.62991e-05	31.3066
rs1291143	C	A	C	A	0.0493145	-0.0218489	0.849026	0.770588	FALSE	FALSE	FALSE	0.183265	0.9051	324735	MONOCYTIC	TRUE	reported	0.0027991	1.8e-69	472174	TL	TRUE	reported	textfile	2	TRUE	0.000656939	310.392
rs12925933	C	A	C	A	-0.0146622	-0.415934	0.66221	0.411303	FALSE	FALSE	FALSE	0.135604	0.00216013	324735	MONOCYTIC	TRUE	reported	0.00213796	7e-12	472174	TL	TRUE	reported	textfile	2	TRUE	9.95987e-05	47.0324
rs12932179	G	A	G	A	-0.0136257	0.186921	0.561399	0.658893	FALSE	FALSE	FALSE	0.158189	0.237352	324735	MONOCYTIC	TRUE	reported	0.0020276	1.8e-11	472174	TL	TRUE	reported	textfile	2	TRUE	9.56334e-05	45.1597
rs13062095	C	T	C	T	0.0138552	0.117338	0.327843	0.400692	FALSE	FALSE	FALSE	0.158158	0.458146	324735	MONOCYTIC	TRUE	reported	0.00214113	9.7e-11	472174	TL	TRUE	reported	textfile	2	TRUE	8.86745e-05	41.8733
rs131797	T	TAAAAA	T	TAAAAA	0.0243752	0.0117201	0.235625	0.187243	FALSE	FALSE	FALSE	0.198248	0.952858	324735	MONOCYTIC	TRUE	reported	0.00236561	6.8e-25	472174	TL	TRUE	reported	textfile	2	TRUE	0.000224807	106.172
rs13230646	C	T	C	T	-0.0173277	-0.170921	0.248945	0.152941	FALSE	FALSE	FALSE	0.201712	0.396799	324735	MONOCYTIC	TRUE	reported	0.00232377	8.9e-14	472174	TL	TRUE	reported	textfile	2	TRUE	0.000117745	55.6024
rs1332941	G	A	G	A	0.0256552	-0.0615864	0.820466	0.782353	FALSE	FALSE	FALSE	0.190305	0.746227	324735	MONOCYTIC	TRUE	reported	0.00273159	5.9e-21	472174	TL	TRUE	reported	textfile	2	TRUE	0.000186783	88.21
rs137901416	A	G	A	G	0.04572	-0.278217	0.100311	0.0470588	FALSE	FALSE	FALSE	0.312112	0.372713	324735	MONOCYTIC	TRUE	reported	0.00332355	4.7e-43	472174	TL	TRUE	reported	textfile	2	TRUE	0.000400619	189.237
rs139669835	T	C	T	C	-0.0612563	-1.04539	0.009365		FALSE	FALSE	FALSE	2.09784	0.618261	324735	MONOCYTIC	TRUE	reported	0.0105346	6.1e-09	472174	TL	TRUE	reported	textfile	2	TRUE	7.16032e-05	33.8114
rs139795227	C	A	C	A	0.0599379	0.335487	0.014021	0.0352941	FALSE	FALSE	FALSE	0.479736	0.484354	324735	MONOCYTIC	TRUE	reported	0.00873247	6.7e-12	472174	TL	TRUE	reported	textfile	2	TRUE	9.97662e-05	47.1115
rs141214782	TTATC	T	TTATC	T	-0.0246687	0.0395533	0.101206	0.111765	FALSE	FALSE	FALSE	0.247387	0.872972	324735	MONOCYTIC	TRUE	reported	0.00335723	2e-13	472174	TL	TRUE	reported	textfile	2	TRUE	0.000114335	53.9919
rs142426306	T	C	T	C	-0.0504903	-0.241421	0.039544	0.0354325	FALSE	FALSE	FALSE	0.383189	0.528675	324735	MONOCYTIC	TRUE	reported	0.00539933	8.7e-21	472174	TL	TRUE	reported	textfile	2	TRUE	0.000185163	87.4449
rs143190905	T	G	T	G	-0.0723995	-0.233508	0.080404	0.0598847	FALSE	FALSE	FALSE	0.289621	0.420097	324735	MONOCYTIC	TRUE	reported	0.00369421	1.6e-85	472174	TL	TRUE	reported	textfile	2	TRUE	0.00081278	384.084
rs144204502	T	C	T	C	-0.100574	-0.322649	0.012562	0.0235294	FALSE	FALSE	FALSE	0.421652	0.444151	324735	MONOCYTIC	TRUE	reported	0.00913369	3.4e-28	472174	TL	TRUE	reported	textfile	2	TRUE	0.000256723	121.249
rs145114957	G	C	G	C	0.0272605	-0.0977962	0.042648	0.0352941	FALSE	TRUE	FALSE	0.396309	0.805088	324735	MONOCYTIC	TRUE	reported	0.00498872	4.6e-08	472174	TL	TRUE	reported	textfile	2	TRUE	6.32353e-05	29.8598
rs150150565	T	C	T	C	0.063762	0.309144	0.021455	0.0235294	FALSE	FALSE	FALSE	0.579813	0.59391	324735	MONOCYTIC	TRUE	reported	0.00739877	6.8e-18	472174	TL	TRUE	reported	textfile	2	TRUE	0.000157266	74.2682
rs16978028	T	A	T	A	-0.029945	0.144525	0.143727	0.0927105	FALSE	TRUE	FALSE	0.279703	0.605359	324735	MONOCYTIC	TRUE	reported	0.00285068	8.2e-26	472174	TL	TRUE	reported	textfile	2	TRUE	0.000233641	110.344
rs17445108	A	G	A	G	-0.0168922	-0.0278194	0.12695	0.12466	FALSE	FALSE	FALSE	0.231757	0.904454	324735	MONOCYTIC	TRUE	reported	0.00300983	2e-08	472174	TL	TRUE	reported	textfile	2	TRUE	6.67049e-05	31.4983
rs182059586	C	T	C	T	-0.0571159	-0.140754	0.02511	0.00588235	FALSE	FALSE	FALSE	0.937554	0.880663	324735	MONOCYTIC	TRUE	reported	0.00680853	4.9e-17	472174	TL	TRUE	reported	textfile	2	TRUE	0.000149019	70.3729
rs185174247	A	G	A	G	0.0372806	-1.02118	0.05609		FALSE	FALSE	FALSE	0.452164	0.0239194	324735	MONOCYTIC	TRUE	reported	0.00435145	1.1e-17	472174	TL	TRUE	reported	textfile	2	TRUE	0.000155428	73.4
rs188918174	T	C	T	C	0.0403062	-0.234091	0.036106	0.037301	FALSE	FALSE	FALSE	0.363053	0.519068	324735	MONOCYTIC	TRUE	reported	0.00543604	1.2e-13	472174	TL	TRUE	reported	textfile	2	TRUE	0.00011642	54.9764
rs1907702	A	G	A	G	0.0150247	0.20566	0.766771	0.835294	FALSE	FALSE	FALSE	0.193073	0.286789	324735	MONOCYTIC	TRUE	reported	0.00242651	5.9e-10	472174	TL	TRUE	reported	textfile	2	TRUE	8.11914e-05	38.3394
rs1957937	T	A	T	A	0.0209365	-0.131371	0.16018	0.164706	FALSE	TRUE	FALSE	0.197819	0.506629	324735	MONOCYTIC	TRUE	reported	0.00273361	1.9e-14	472174	TL	TRUE	reported	textfile	2	TRUE	0.000124216	58.6588
rs1985369	G	A	G	A	-0.0311893	0.220572	0.868178	0.912872	FALSE	FALSE	FALSE	0.250189	0.377983	324735	MONOCYTIC	TRUE	reported	0.00300952	3.6e-25	472174	TL	TRUE	reported	textfile	2	TRUE	0.000227413	107.403
rs201009932	T	TA	T	TA	0.0769296	-0.334296	0.991068	0.964521	FALSE	FALSE	FALSE	0.479234	0.485449	324735	MONOCYTIC	TRUE	reported	0.0116209	3.6e-11	472174	TL	TRUE	reported	textfile	2	TRUE	9.28036e-05	43.8234
rs2056726	A	G	A	G	-0.0228078	0.00434001	0.214376	0.232918	FALSE	FALSE	FALSE	0.181536	0.980927	324735	MONOCYTIC	TRUE	reported	0.00243638	7.9e-21	472174	TL	TRUE	reported	textfile	2	TRUE	0.000185564	87.6345
rs2230590	C	T	C	T	-0.0158022	0.230716	0.510897	0.452941	FALSE	FALSE	FALSE	0.157097	0.141936	324735	MONOCYTIC	TRUE	reported	0.00200806	3.6e-15	472174	TL	TRUE	reported	textfile	2	TRUE	0.000131136	61.927
rs2282764	G	A	G	A	-0.0224234	-0.191292	0.142384	0.117647	FALSE	FALSE	FALSE	0.222286	0.389476	324735	MONOCYTIC	TRUE	reported	0.00289392	9.3e-15	472174	TL	TRUE	reported	textfile	2	TRUE	0.000127137	60.0383
rs2293579	A	G	A	G	-0.012915	-0.0847759	0.386274	0.288235	FALSE	FALSE	FALSE	0.16624	0.610079	324735	MONOCYTIC	TRUE	reported	0.00205481	3.3e-10	472174	TL	TRUE	reported	textfile	2	TRUE	8.36579e-05	39.5042
rs2538745	C	T	C	T	-0.012942	-0.0563578	0.602841	0.511834	FALSE	FALSE	FALSE	0.153508	0.71352	324735	MONOCYTIC	TRUE	reported	0.002056	3.1e-10	472174	TL	TRUE	reported	textfile	2	TRUE	8.39108e-05	39.6237
rs2555104	C	A	C	A	-0.0139717	0.0141967	0.434255	0.488235	FALSE	FALSE	FALSE	0.153751	0.926431	324735	MONOCYTIC	TRUE	reported	0.00203498	6.6e-12	472174	TL	TRUE	reported	textfile	2	TRUE	9.98235e-05	47.1386
rs2763979	T	C	T	C	-0.0277713	-0.0784174	0.359721	0.411765	FALSE	FALSE	FALSE	0.155401	0.613831	324735	MONOCYTIC	TRUE	reported	0.00208092	1.3e-40	472174	TL	TRUE	reported	textfile	2	TRUE	0.000377065	178.107
rs28502153	A	C	A	C	-0.0215916	-0.0162578	0.377958	0.372111	FALSE	FALSE	FALSE	0.158483	0.918293	324735	MONOCYTIC	TRUE	reported	0.00206208	1.2e-25	472174	TL	TRUE	reported	textfile	2	TRUE	0.000232143	109.637
rs28577594	C	G	C	G	0.0187657	-0.0751487	0.709829	0.689735	FALSE	TRUE	FALSE	0.169494	0.657497	324735	MONOCYTIC	TRUE	reported	0.00224024	5.4e-17	472174	TL	TRUE	reported	textfile	2	TRUE	0.000148585	70.1679
rs2967355	C	A	C	A	-0.0461595	0.177266	0.774276	0.853126	FALSE	FALSE	FALSE	0.202944	0.382405	324735	MONOCYTIC	TRUE	reported	0.00238972	4e-83	472174	TL	TRUE	reported	textfile	2	TRUE	0.000789556	373.101
rs2977608	C	A	C	A	0.0129483	0.157934	0.743949	0.723899	FALSE	FALSE	FALSE	0.167405	0.345466	324735	MONOCYTIC	TRUE	reported	0.00233716	3e-08	472174	TL	TRUE	reported	textfile	2	TRUE	6.50007e-05	30.6935
rs3093888	A	G	A	G	-0.028973	0.445312	0.05131	0.123529	FALSE	FALSE	FALSE	0.270524	0.0997401	324735	MONOCYTIC	TRUE	reported	0.00452459	1.5e-10	472174	TL	TRUE	reported	textfile	2	TRUE	8.68338e-05	41.004
rs35640778	A	G	A	G	-0.209011	-0.00634663	0.020757	0.0117647	FALSE	FALSE	FALSE	0.715043	0.992918	324735	MONOCYTIC	TRUE	reported	0.00702087	9.59e-195	472174	TL	TRUE	reported	textfile	2	TRUE	0.00187344	886.247
rs3767952	A	G	A	G	0.0134472	0.131989	0.226709	0.247059	FALSE	FALSE	FALSE	0.183633	0.472287	324735	MONOCYTIC	TRUE	reported	0.00238826	1.8e-08	472174	TL	TRUE	reported	textfile	2	TRUE	6.71381e-05	31.7029
rs3785074	G	A	G	A	0.023863	0.0870977	0.289672	0.223529	FALSE	FALSE	FALSE	0.190284	0.64715	324735	MONOCYTIC	TRUE	reported	0.00220455	2.6e-27	472174	TL	TRUE	reported	textfile	2	TRUE	0.000248085	117.168
rs41269079	A	T	A	T	0.0153617	-0.00878895	0.188991	0.205882	FALSE	TRUE	FALSE	0.188962	0.962902	324735	MONOCYTIC	TRUE	reported	0.0025499	1.7e-09	472174	TL	TRUE	reported	textfile	2	TRUE	7.68594e-05	36.2936
rs41304832	A	G	A	G	0.0611702	-0.00688882	0.012378	0.0352941	FALSE	FALSE	FALSE	0.415267	0.986765	324735	MONOCYTIC	TRUE	reported	0.0093095	5e-11	472174	TL	TRUE	reported	textfile	2	TRUE	9.14293e-05	43.1743
rs429358	C	T	C	T	0.0173498	-0.00303892	0.153969	0.176655	FALSE	FALSE	FALSE	0.201629	0.987975	324735	MONOCYTIC	TRUE	reported	0.00277091	3.8e-10	472174	TL	TRUE	reported	textfile	2	TRUE	8.30244e-05	39.2051
rs4498805	T	G	T	G	0.0150601	0.0247786	0.546632	0.511995	FALSE	FALSE	FALSE	0.152707	0.871099	324735	MONOCYTIC	TRUE	reported	0.00200376	5.7e-14	472174	TL	TRUE	reported	textfile	2	TRUE	0.000119622	56.4888
rs4530278	T	G	T	G	0.0138793	0.00626998	0.59815	0.607705	FALSE	FALSE	FALSE	0.157325	0.96821	324735	MONOCYTIC	TRUE	reported	0.0020567	1.5e-11	472174	TL	TRUE	reported	textfile	2	TRUE	9.64382e-05	45.5398
rs45604339	T	C	T	C	-0.020433	-0.0496129	0.34242	0.376471	FALSE	FALSE	FALSE	0.157553	0.752841	324735	MONOCYTIC	TRUE	reported	0.00211433	4.3e-22	472174	TL	TRUE	reported	textfile	2	TRUE	0.000197756	93.3936
rs4695407	G	A	G	A	0.0141511	-0.0782904	0.507843	0.452941	FALSE	FALSE	FALSE	0.153369	0.609722	324735	MONOCYTIC	TRUE	reported	0.00199925	1.5e-12	472174	TL	TRUE	reported	textfile	2	TRUE	0.000106096	50.1008
rs4724	A	G	A	G	-0.0547446	-0.492343	0.116598	0.0587543	FALSE	FALSE	FALSE	0.250067	0.0489711	324735	MONOCYTIC	TRUE	reported	0.00312441	9.8e-69	472174	TL	TRUE	reported	textfile	2	TRUE	0.000649774	307.004
rs4731541	G	C	G	C	-0.0206119	0.0639611	0.624901	0.652941	FALSE	TRUE	FALSE	0.161143	0.691425	324735	MONOCYTIC	TRUE	reported	0.00205962	1.4e-23	472174	TL	TRUE	reported	textfile	2	TRUE	0.000212064	100.152
rs4743037	T	C	T	C	0.0147971	0.00651313	0.230874	0.220761	FALSE	FALSE	FALSE	0.186091	0.97208	324735	MONOCYTIC	TRUE	reported	0.00238094	5.1e-10	472174	TL	TRUE	reported	textfile	2	TRUE	8.17935e-05	38.6238
rs55747751	A	G	A	G	-0.0211612	-0.411674	0.077375	0.0352941	FALSE	FALSE	FALSE	0.333781	0.21744	324735	MONOCYTIC	TRUE	reported	0.00375164	1.7e-08	472174	TL	TRUE	reported	textfile	2	TRUE	6.73763e-05	31.8153
rs56799554	G	A	G	A	-0.0259793	-0.109207	0.170183	0.213126	FALSE	FALSE	FALSE	0.183786	0.552372	324735	MONOCYTIC	TRUE	reported	0.00267858	3e-22	472174	TL	TRUE	reported	textfile	2	TRUE	0.000199185	94.0684
rs5742915	C	T	C	T	0.0193377	0.0648163	0.445829	0.429412	FALSE	FALSE	FALSE	0.156595	0.678939	324735	MONOCYTIC	TRUE	reported	0.00202886	1.6e-21	472174	TL	TRUE	reported	textfile	2	TRUE	0.000192362	90.8455
rs59409453	G	A	G	A	0.0202133	-0.145272	0.730602	0.765213	FALSE	FALSE	FALSE	0.189998	0.444511	324735	MONOCYTIC	TRUE	reported	0.00230175	1.6e-18	472174	TL	TRUE	reported	textfile	2	TRUE	0.0001633	77.1181
rs6007020	C	T	C	T	0.0144904	-0.0233924	0.367823	0.342191	FALSE	FALSE	FALSE	0.160495	0.884118	324735	MONOCYTIC	TRUE	reported	0.00209637	4.8e-12	472174	TL	TRUE	reported	textfile	2	TRUE	0.000101176	47.7775
rs6054257	A	G	A	G	-0.0141684	-0.0548272	0.793522	0.794048	FALSE	FALSE	FALSE	0.194274	0.777779	324735	MONOCYTIC	TRUE	reported	0.00247729	1.1e-08	472174	TL	TRUE	reported	textfile	2	TRUE	6.92717e-05	32.7104
rs61748181	T	C	T	C	-0.059181	0.0691231	0.028928	0.0588235	FALSE	FALSE	FALSE	0.336439	0.837216	324735	MONOCYTIC	TRUE	reported	0.00595394	2.8e-23	472174	TL	TRUE	reported	textfile	2	TRUE	0.000209201	98.7993
rs6536702	A	G	A	G	0.0534148	0.149666	0.774647	0.835294	FALSE	FALSE	FALSE	0.196934	0.447266	324735	MONOCYTIC	TRUE	reported	0.00238875	9.4e-111	472174	TL	TRUE	reported	textfile	2	TRUE	0.00105784	500.011
rs6584579	G	A	G	A	0.0114923	-0.104292	0.398876	0.305952	FALSE	FALSE	FALSE	0.164197	0.525322	324735	MONOCYTIC	TRUE	reported	0.00204674	2e-08	472174	TL	TRUE	reported	textfile	2	TRUE	6.67663e-05	31.5273
rs6587577	G	A	G	A	-0.0182148	-0.270595	0.826346	0.804406	FALSE	FALSE	FALSE	0.209823	0.197177	324735	MONOCYTIC	TRUE	reported	0.0026359	4.8e-12	472174	TL	TRUE	reported	textfile	2	TRUE	0.000101122	47.7517
rs6659669	T	C	T	C	-0.0117091	0.255908	0.605095	0.647059	FALSE	FALSE	FALSE	0.155413	0.0996346	324735	MONOCYTIC	TRUE	reported	0.00205167	1.1e-08	472174	TL	TRUE	reported	textfile	2	TRUE	6.89763e-05	32.5709
rs6669563	A	G	A	G	0.0182358	-0.247159	0.437768	0.405882	FALSE	FALSE	FALSE	0.155071	0.110972	324735	MONOCYTIC	TRUE	reported	0.00202476	2.1e-19	472174	TL	TRUE	reported	textfile	2	TRUE	0.000171762	81.1149
rs66731853	A	G	A	G	-0.0177791	0.0736685	0.317304	0.205882	FALSE	FALSE	FALSE	0.194208	0.704445	324735	MONOCYTIC	TRUE	reported	0.00215421	1.5e-16	472174	TL	TRUE	reported	textfile	2	TRUE	0.000144238	68.1148
rs6751209	C	T	C	T	-0.0140465	-0.167583	0.204231	0.159123	FALSE	FALSE	FALSE	0.198035	0.397426	324735	MONOCYTIC	TRUE	reported	0.00248465	1.6e-08	472174	TL	TRUE	reported	textfile	2	TRUE	6.76822e-05	31.9598
rs6776756	A	G	A	G	-0.0174439	-0.0128649	0.597562	0.534579	FALSE	FALSE	FALSE	0.156146	0.934336	324735	MONOCYTIC	TRUE	reported	0.00203747	1.1e-17	472174	TL	TRUE	reported	textfile	2	TRUE	0.000155216	73.2998
rs6881568	A	C	A	C	0.0169256	-0.1317	0.36258	0.245813	FALSE	FALSE	FALSE	0.172339	0.444754	324735	MONOCYTIC	TRUE	reported	0.00207735	3.7e-16	472174	TL	TRUE	reported	textfile	2	TRUE	0.000140574	66.3845
rs7099229	A	G	A	G	-0.0153288	0.305991	0.273301	0.224683	FALSE	FALSE	FALSE	0.200969	0.127864	324735	MONOCYTIC	TRUE	reported	0.00224403	8.4e-12	472174	TL	TRUE	reported	textfile	2	TRUE	9.8813e-05	46.6613
rs7164950	G	A	G	A	0.0129362	-0.027678	0.405979	0.420415	FALSE	FALSE	FALSE	0.156167	0.859325	324735	MONOCYTIC	TRUE	reported	0.00204001	2.3e-10	472174	TL	TRUE	reported	textfile	2	TRUE	8.51549e-05	40.2112
rs7209057	A	G	A	G	0.011819	-0.0521943	0.561044	0.53887	FALSE	FALSE	FALSE	0.15473	0.735872	324735	MONOCYTIC	TRUE	reported	0.00202865	5.7e-09	472174	TL	TRUE	reported	textfile	2	TRUE	7.1881e-05	33.9426
rs7221585	T	C	T	C	0.0143271	0.137502	0.22401	0.305882	FALSE	FALSE	FALSE	0.171531	0.422776	324735	MONOCYTIC	TRUE	reported	0.00247042	6.7e-09	472174	TL	TRUE	reported	textfile	2	TRUE	7.12266e-05	33.6336
rs73581419	T	C	T	C	0.0229838	-0.0275035	0.106605	0.0823529	FALSE	FALSE	FALSE	0.276452	0.920751	324735	MONOCYTIC	TRUE	reported	0.00324156	1.3e-12	472174	TL	TRUE	reported	textfile	2	TRUE	0.00010646	50.2729
rs75664430	G	C	G	C	-0.0235179	0.0485185	0.248028	0.201407	FALSE	TRUE	FALSE	0.195272	0.803774	324735	MONOCYTIC	TRUE	reported	0.0023186	3.6e-24	472174	TL	TRUE	reported	textfile	2	TRUE	0.000217846	102.883
rs76065543	T	C	T	C	0.0342843	-0.0196299	0.137527	0.176286	FALSE	FALSE	FALSE	0.199366	0.921566	324735	MONOCYTIC	TRUE	reported	0.00290708	4.2e-32	472174	TL	TRUE	reported	textfile	2	TRUE	0.000294474	139.083
rs76094497	A	G	A	G	0.0278689	0.191628	0.051569	0.029481	FALSE	FALSE	FALSE	0.494224	0.698212	324735	MONOCYTIC	TRUE	reported	0.00461731	1.6e-09	472174	TL	TRUE	reported	textfile	2	TRUE	7.71482e-05	36.43
rs76219171	A	G	A	G	0.0359839	-0.519289	0.058433	0.0176471	FALSE	FALSE	FALSE	0.415557	0.211438	324735	MONOCYTIC	TRUE	reported	0.00431741	7.8e-17	472174	TL	TRUE	reported	textfile	2	TRUE	0.000147097	69.4653
rs762679	A	T	A	T	0.0310104	-0.178374	0.856501	0.80083	FALSE	TRUE	FALSE	0.204014	0.381943	324735	MONOCYTIC	TRUE	reported	0.00285024	1.4e-27	472174	TL	TRUE	reported	textfile	2	TRUE	0.000250635	118.372
rs76666449	C	T	C	T	0.0295125	-0.282131	0.100625	0.105882	FALSE	FALSE	FALSE	0.220946	0.201628	324735	MONOCYTIC	TRUE	reported	0.00333186	8.2e-19	472174	TL	TRUE	reported	textfile	2	TRUE	0.000166136	78.4579
rs77231040	C	G	C	G	0.0989303	-0.101295	0.005742	0.0235294	FALSE	TRUE	FALSE	0.484525	0.834401	324735	MONOCYTIC	TRUE	reported	0.0134649	2e-13	472174	TL	TRUE	reported	textfile	2	TRUE	0.000114314	53.9822
rs7726159	A	C	A	C	0.0707719	0.25726	0.327295	0.381476	FALSE	FALSE	FALSE	0.163627	0.115895	324735	MONOCYTIC	TRUE	reported	0.0021282	1e-200	472174	TL	TRUE	reported	textfile	2	TRUE	0.00233657	1105.85
rs7772289	T	G	T	G	0.017549	0.0530761	0.503081	0.629412	FALSE	FALSE	FALSE	0.15924	0.738902	324735	MONOCYTIC	TRUE	reported	0.00200003	1.7e-18	472174	TL	TRUE	reported	textfile	2	TRUE	0.000163027	76.9892
rs77732866	A	G	A	G	0.0177942	-0.00165337	0.137597	0.141176	FALSE	FALSE	FALSE	0.219227	0.993983	324735	MONOCYTIC	TRUE	reported	0.00290595	9.2e-10	472174	TL	TRUE	reported	textfile	2	TRUE	7.94043e-05	37.4955
rs7790856	T	C	T	C	-0.0437199	0.162533	0.289139	0.252941	FALSE	FALSE	FALSE	0.18331	0.375265	324735	MONOCYTIC	TRUE	reported	0.00220526	1.8e-87	472174	TL	TRUE	reported	textfile	2	TRUE	0.000831716	393.04
rs78491606	C	A	C	A	-0.0756311	0.147825	0.018433	0.0352941	FALSE	FALSE	FALSE	0.442055	0.738074	324735	MONOCYTIC	TRUE	reported	0.00741168	1.9e-24	472174	TL	TRUE	reported	textfile	2	TRUE	0.00022048	104.128
rs79977579	A	C	A	C	0.0281517	-0.43157	0.09555	0.058293	FALSE	FALSE	FALSE	0.262933	0.100721	324735	MONOCYTIC	TRUE	reported	0.00343182	2.3e-16	472174	TL	TRUE	reported	textfile	2	TRUE	0.000142494	67.2912
rs80116508	A	G	A	G	-0.0352672	-0.193937	0.062356	0.0647059	FALSE	FALSE	FALSE	0.285511	0.496971	324735	MONOCYTIC	TRUE	reported	0.00415151	2e-17	472174	TL	TRUE	reported	textfile	2	TRUE	0.000152813	72.1652
rs80324517	A	G	A	G	0.0396515	-0.100765	0.048259	0.0588235	FALSE	FALSE	FALSE	0.311635	0.746435	324735	MONOCYTIC	TRUE	reported	0.00466286	1.8e-17	472174	TL	TRUE	reported	textfile	2	TRUE	0.000153125	72.3124
rs8102497	A	G	A	G	-0.0149654	-0.0253507	0.431828	0.443991	FALSE	FALSE	FALSE	0.154601	0.869751	324735	MONOCYTIC	TRUE	reported	0.0020233	1.4e-13	472174	TL	TRUE	reported	textfile	2	TRUE	0.000115852	54.7084
rs8105767	G	A	G	A	0.0328384	0.26062	0.29467	0.376471	FALSE	FALSE	FALSE	0.164094	0.112232	324735	MONOCYTIC	TRUE	reported	0.00220117	2.5e-50	472174	TL	TRUE	reported	textfile	2	TRUE	0.00047114	222.564
rs869785	C	T	C	T	-0.0147303	0.112476	0.672471	0.684129	FALSE	FALSE	FALSE	0.162616	0.489145	324735	MONOCYTIC	TRUE	reported	0.00212801	4.4e-12	472174	TL	TRUE	reported	textfile	2	TRUE	0.000101468	47.9153
rs871134	T	C	T	C	-0.0182986	0.172279	0.569032	0.6	FALSE	FALSE	FALSE	0.15446	0.264696	324735	MONOCYTIC	TRUE	reported	0.0020263	1.7e-19	472174	TL	TRUE	reported	textfile	2	TRUE	0.000172684	81.5505
rs932002	T	C	T	C	-0.0402052	0.0508257	0.150843	0.241176	FALSE	FALSE	FALSE	0.182321	0.780421	324735	MONOCYTIC	TRUE	reported	0.00279667	7.3e-47	472174	TL	TRUE	reported	textfile	2	TRUE	0.000437512	206.671
rs9398196	G	A	G	A	-0.0143586	0.107111	0.52005	0.647059	FALSE	FALSE	FALSE	0.159554	0.502019	324735	MONOCYTIC	TRUE	reported	0.00201175	9.5e-13	472174	TL	TRUE	reported	textfile	2	TRUE	0.000107877	50.9418
rs939916	A	G	A	G	0.0241795	-0.0367729	0.669967	0.723714	FALSE	FALSE	FALSE	0.173224	0.831885	324735	MONOCYTIC	TRUE	reported	0.00216724	6.6e-29	472174	TL	TRUE	reported	textfile	2	TRUE	0.000263551	124.474
rs9419958	C	T	C	T	-0.0810098	0.139252	0.86139	0.894118	FALSE	FALSE	FALSE	0.237075	0.556951	324735	MONOCYTIC	TRUE	reported	0.00293847	2.6e-167	472174	TL	TRUE	reported	textfile	2	TRUE	0.00160706	760.03
rs9600019	T	C	T	C	0.0127134	-0.0310917	0.335579	0.370404	FALSE	FALSE	FALSE	0.158714	0.84469	324735	MONOCYTIC	TRUE	reported	0.00213096	2.4e-09	472174	TL	TRUE	reported	textfile	2	TRUE	7.53769e-05	35.5935
rs9878436	T	C	T	C	-0.0143407	0.089534	0.434393	0.371188	FALSE	FALSE	FALSE	0.160553	0.577077	324735	MONOCYTIC	TRUE	reported	0.00201819	1.2e-12	472174	TL	TRUE	reported	textfile	2	TRUE	0.000106922	50.4911
rs9955360	A	C	A	C	-0.0190311	-0.0454682	0.869288	0.849112	FALSE	FALSE	FALSE	0.21729	0.834252	324735	MONOCYTIC	TRUE	reported	0.00299791	2.2e-10	472174	TL	TRUE	reported	textfile	2	TRUE	8.53398e-05	40.2985

[truncated: 1 more sheets: mature T NK-cell lymphomas]
